# Supplementary material for: Evaluating the Alimentary and Respiratory Tracts in Health and disease (EARTH) research programme: a protocol for prospective, longitudinal, controlled, observational studies in children with chronic disease at an Australian tertiary paediatric hospital
Source: PubMed Central journal article supplement — BMJ Open. 2020 Apr 14;10(4):e033916. doi: 10.1136/bmjopen-2019-033916 (PMC7200033; doi:10.1136/bmjopen-2019-033916), 2020-04-14
Supplement: bmjopen-2019-033916.draft_revisions.pdf [file bmjopen-2019-033916.draft_revisions.pdf]

# BMJ Open

BMJ Open is committed to open peer review. As part of this commitment we make the peer review history of every article we publish publicly available.

When an article is published we post the peer reviewers' comments and the authors' responses online. We also post the versions of the paper that were used during peer review. These are the versions that the peer review comments apply to.

The versions of the paper that follow are the versions that were submitted during the peer review process. They are not the versions of record or the final published versions. They should not be cited or distributed as the published version of this manuscript.

BMJ Open is an open access journal and the full, final, typeset and author-corrected version of record of the manuscript is available on our site with no access controls, subscription charges or pay-per-view fees (<http://bmjopen.bmj.com>).

If you have any questions on BMJ Open's open peer review process please email [info.bmjopen@bmj.com](mailto:info.bmjopen@bmj.com)

# BMJ Open

## Evaluating the Alimentary and Respiratory Tracts in Health and disease (EARTH) research program: a protocol for prospective, longitudinal, controlled, observational studies in children with chronic disease.

|                               |                                                                                                                                                                                                                                                                                                                                                                                                                                                                                                                                                                                                                                                                                                                                                                                                                                                                                                                                                                                                                                                                                                                                                                                                                                                                                                                                                                                                                                                                                                                                                                                                                                                                                                                                                                                                                                                                                                                                                                                                                                                                                                                                                                                                                                                                      |
|-------------------------------|----------------------------------------------------------------------------------------------------------------------------------------------------------------------------------------------------------------------------------------------------------------------------------------------------------------------------------------------------------------------------------------------------------------------------------------------------------------------------------------------------------------------------------------------------------------------------------------------------------------------------------------------------------------------------------------------------------------------------------------------------------------------------------------------------------------------------------------------------------------------------------------------------------------------------------------------------------------------------------------------------------------------------------------------------------------------------------------------------------------------------------------------------------------------------------------------------------------------------------------------------------------------------------------------------------------------------------------------------------------------------------------------------------------------------------------------------------------------------------------------------------------------------------------------------------------------------------------------------------------------------------------------------------------------------------------------------------------------------------------------------------------------------------------------------------------------------------------------------------------------------------------------------------------------------------------------------------------------------------------------------------------------------------------------------------------------------------------------------------------------------------------------------------------------------------------------------------------------------------------------------------------------|
| Journal:                      | <i>BMJ Open</i>                                                                                                                                                                                                                                                                                                                                                                                                                                                                                                                                                                                                                                                                                                                                                                                                                                                                                                                                                                                                                                                                                                                                                                                                                                                                                                                                                                                                                                                                                                                                                                                                                                                                                                                                                                                                                                                                                                                                                                                                                                                                                                                                                                                                                                                      |
| Manuscript ID                 | bmjopen-2019-033916                                                                                                                                                                                                                                                                                                                                                                                                                                                                                                                                                                                                                                                                                                                                                                                                                                                                                                                                                                                                                                                                                                                                                                                                                                                                                                                                                                                                                                                                                                                                                                                                                                                                                                                                                                                                                                                                                                                                                                                                                                                                                                                                                                                                                                                  |
| Article Type:                 | Protocol                                                                                                                                                                                                                                                                                                                                                                                                                                                                                                                                                                                                                                                                                                                                                                                                                                                                                                                                                                                                                                                                                                                                                                                                                                                                                                                                                                                                                                                                                                                                                                                                                                                                                                                                                                                                                                                                                                                                                                                                                                                                                                                                                                                                                                                             |
| Date Submitted by the Author: | 28-Aug-2019                                                                                                                                                                                                                                                                                                                                                                                                                                                                                                                                                                                                                                                                                                                                                                                                                                                                                                                                                                                                                                                                                                                                                                                                                                                                                                                                                                                                                                                                                                                                                                                                                                                                                                                                                                                                                                                                                                                                                                                                                                                                                                                                                                                                                                                          |
| Complete List of Authors:     | <p>Coffey, Michael; University of New South Wales, Discipline of Paediatrics, School of Women's and Children's Health, Faculty of Medicine</p> <p>McKay, Isabelle; University of New South Wales, Discipline of Paediatrics, School of Women's and Children's Health, Faculty of Medicine</p> <p>Doumit, Michael; Sydney Children's Hospital Randwick, Department of Physiotherapy</p> <p>Chuang, Sandra; University of New South Wales, Discipline of Paediatrics, School of Women's and Children's Health, Faculty of Medicine; Sydney Children's Hospital Randwick, Department of Respiratory</p> <p>Adams, Susan; Sydney Children's Hospital Randwick &amp; Neuroscience Research Australia (NeuRA), Department of Surgery; University of New South Wales, Discipline of Paediatrics, School of Women's and Children's Health &amp; School of Medical Sciences, Faculty of Medicine</p> <p>Stelzer-Braid, Sacha; University of New South Wales, School of Medical Sciences; Prince of Wales Hospital, Virology Research Laboratory</p> <p>Waters, Shafagh A; University of New South Wales, Discipline of Paediatrics, School of Women's and Children's Health, Faculty of Medicine; Molecular and Integrative Cystic Fibrosis (miCF) Research Centre</p> <p>Kasparian, N; University of New South Wales, Discipline of Paediatrics, School of Women's and Children's Health, Faculty of Medicine; Harvard Medical School</p> <p>Thomas, Torsten; University of New South Wales, Centre for Marine Science and Innovation, School of Biological, Earth and Environmental Sciences</p> <p>Jaffe, Adam; University of New South Wales, Discipline of Paediatrics, School of Women's and Children's Health, Faculty of Medicine; Sydney Children's Hospital Randwick, Molecular and Integrative Cystic Fibrosis (miCF) Research Centre &amp; Department of Respiratory</p> <p>Katz, Tamarah; Sydney Children's Hospital Randwick, Department of Nutrition and Dietetics</p> <p>Ooi, Chee Y.; University of New South Wales, Discipline of Paediatrics, School of Women's and Children's Health, Faculty of Medicine; Sydney Children's Hospital Randwick, Molecular and Integrative Cystic Fibrosis (miCF) Research Centre &amp; Department of Gastroenterology</p> |

1  
2  
3  
4  
5  
6  
7  
8  
9  
10  
11  
12  
13  
14  
15  
16  
17  
18  
19  
20  
21  
22  
23  
24  
25  
26  
27  
28  
29  
30  
31  
32  
33  
34  
35  
36  
37  
38  
39  
40  
41  
42  
43  
44  
45  
46  
47  
48  
49  
50  
51  
52  
53  
54  
55  
56  
57  
58  
59  
60

|           |                                                                                                    |
|-----------|----------------------------------------------------------------------------------------------------|
| Keywords: | PAEDIATRICS, GASTROENTEROLOGY, RESPIRATORY MEDICINE (see Thoracic Medicine), NUTRITION & DIETETICS |
|           |                                                                                                    |

SCHOLARONE™  
Manuscripts

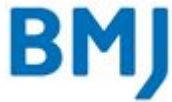

I, the Submitting Author has the right to grant and does grant on behalf of all authors of the Work (as defined in the below author licence), an exclusive licence and/or a non-exclusive licence for contributions from authors who are: i) UK Crown employees; ii) where BMJ has agreed a CC-BY licence shall apply, and/or iii) in accordance with the terms applicable for US Federal Government officers or employees acting as part of their official duties; on a worldwide, perpetual, irrevocable, royalty-free basis to BMJ Publishing Group Ltd ("BMJ") its licensees and where the relevant Journal is co-owned by BMJ to the co-owners of the Journal, to publish the Work in this journal and any other BMJ products and to exploit all rights, as set out in our [licence](#).

The Submitting Author accepts and understands that any supply made under these terms is made by BMJ to the Submitting Author unless you are acting as an employee on behalf of your employer or a postgraduate student of an affiliated institution which is paying any applicable article publishing charge ("APC") for Open Access articles. Where the Submitting Author wishes to make the Work available on an Open Access basis (and intends to pay the relevant APC), the terms of reuse of such Open Access shall be governed by a Creative Commons licence – details of these licences and which [Creative Commons](#) licence will apply to this Work are set out in our licence referred to above.

Other than as permitted in any relevant BMJ Author's Self Archiving Policies, I confirm this Work has not been accepted for publication elsewhere, is not being considered for publication elsewhere and does not duplicate material already published. I confirm all authors consent to publication of this Work and authorise the granting of this licence.

1  
2  
3 **Evaluating the Alimentary and Respiratory Tracts in Health and disease**  
4  
5  
6 **(EARTH) research program: a protocol for prospective, longitudinal, controlled,**  
7  
8 **observational studies in children with chronic disease.**  
9

10  
11  
12  
13 **Authors:**

14  
15 Michael J Coffey,<sup>1</sup> Isabelle R McKay,<sup>1</sup> Michael Doumit,<sup>2</sup> Sandra Chuang,<sup>1,3</sup> Susan  
16 Adams,<sup>1,4,5,6</sup> Sacha Stelzer-Braid,<sup>5,7</sup> Shafagh Waters,<sup>1,8</sup> Nadine A. Kasparian,<sup>1,9</sup> Torsten  
17 Thomas,<sup>10</sup> Adam Jaffe,<sup>1,3,8</sup> Tamarah Katz,<sup>11</sup> Chee Y Ooi.<sup>1,7,12,\*</sup>  
18  
19  
20  
21  
22

23  
24 <sup>1</sup>Discipline of Paediatrics, School of Women's and Children's Health, University of New South  
25 Wales, Sydney, NSW, Australia.  
26

27  
28 <sup>2</sup>Department of Physiotherapy, Sydney Children's Hospital Randwick, Sydney, Australia.  
29

30  
31 <sup>3</sup>Department of Respiratory, Sydney Children's Hospital, High Street, Randwick NSW,  
32 Australia.  
33

34  
35 <sup>4</sup>Department of Surgery, Sydney Children's Hospital Randwick, Sydney, Australia.  
36

37  
38 <sup>5</sup>School of Medical Sciences, University of New South Wales, Sydney, NSW, Australia.  
39

40  
41 <sup>6</sup>Neuroscience Research Australia (NeuRA), Sydney, NSW, Australia.  
42

43  
44 <sup>7</sup>Virology Research Laboratory, Prince of Wales Hospital, Sydney, NSW, Australia.  
45

46  
47 <sup>8</sup>Molecular and Integrative Cystic Fibrosis (miCF) Research Centre, High Street, Randwick  
48 NSW, Australia.  
49

50  
51 <sup>9</sup>Harvard Medical School, Boston, Massachusetts, United States.  
52

53  
54 <sup>10</sup>Centre for Marine Science and Innovation, School of Biological, Earth and Environmental  
55 Sciences, University of New South Wales, Sydney NSW, Australia.  
56

57  
58 <sup>11</sup>Department of Nutrition and Dietetics, Sydney Children's Hospital, Sydney, Australia.  
59  
60

1  
2  
3 <sup>12</sup>Department of Gastroenterology, Sydney Children's Hospital, High Street, Randwick NSW,  
4  
5 Australia.

6  
7  
8 \*Correspondence to Associate Professor Chee Y. (Keith) Ooi; [keith.ooi@unsw.edu.au](mailto:keith.ooi@unsw.edu.au)  
9

10  
11  
12 **Keywords**

13  
14 Child; Chronic Disease; Diet Surveys; Microbiome, Human; Quality of Life.  
15  
16

17  
18  
19 **Word Count**

20  
21 3,747  
22  
23  
24  
25  
26  
27  
28  
29  
30  
31  
32  
33  
34  
35  
36  
37  
38  
39  
40  
41  
42  
43  
44  
45  
46  
47  
48  
49  
50  
51  
52  
53  
54  
55  
56  
57  
58  
59  
60

For peer review only

## ABSTRACT

### Introduction

Chronic gastrointestinal and respiratory conditions of childhood can have long-lasting physical, psychosocial, and economic effects on children and their families. Alterations in diet and intestinal and respiratory microbiomes may have important implications for physical and psychosocial health. Diet influences the intestinal microbiome and should be considered when exploring disease-specific alterations. The concepts of gut-brain and gut-lung axes provide novel perspectives for examining chronic childhood disease(s). We established the “Evaluating the Alimentary and Respiratory Tracts in Health and disease” (EARTH) research program to provide a structured, holistic evaluation of children with chronic gastrointestinal and/or respiratory conditions.

### Methods and analysis

The EARTH program provides a framework for a series of prospective, longitudinal, controlled, observational studies (comprised of individual sub-studies), conducted at an Australian tertiary paediatric hospital (the methodology is applicable to other settings). Children with a chronic gastrointestinal and/or respiratory condition will be compared to age and gender matched healthy controls (HC) across a 12-month period. The following will be collected at baseline, 6 and 12 months: (i) stool, (ii) oropharyngeal swab or sputum, (iii) semi-quantitative food frequency questionnaire, (iv) details of disease symptomatology, (v) health-related quality of life, and (vi) psychosocial factors. Data on the intestinal and respiratory microbiomes and diet will be compared between children with a condition and HC. Correlations between dietary intake (energy, macro- and micro-nutrients), intestinal and respiratory microbiomes within each group will be explored. Data on disease symptomatology,

1  
2  
3 quality of life and psychosocial factors will also be compared between children with a condition  
4 and HC.  
5

6  
7 Results will be hypothesis-generating and used to direct future focused studies. There is future  
8 potential for direct translation into clinical care, as diet is a highly modifiable factor.  
9  
10  
11  
12  
13

### 14 **Ethics and dissemination**

15  
16  
17 Ethics approval: HREC/18/SCHN/26. Study results will be presented at international  
18 conferences and published in peer-reviewed journals.  
19  
20  
21  
22  
23

### 24 **Trial registration**

25  
26 NCT04071314  
27  
28  
29  
30  
31  
32

## 33 **ARTICLE SUMMARY**

### 34 **Strengths and limitations of this study**

- 35  
36  
37  
38  
39  
40  
41  
42  
43  
44  
45  
46  
47  
48  
49  
50  
51  
52  
53  
54  
55  
56  
57  
58  
59  
60
- The prospective, longitudinal, controlled, observational design of this research program provides a structured approach which can be simultaneously applied to multiple chronic gastrointestinal and/or respiratory conditions of childhood and utilises a universal control cohort (for age and gender matching).
  - This study will simultaneously evaluate dietary intake and the intestinal and respiratory microbiomes, which will tease out disease-causing alterations in the microbiomes, provide insights into the gut-lung axis and potentially identify modifiable dietary factors.
  - We will explore relationships between the primary outcomes (diet, intestinal and respiratory microbiomes) and health-related quality of life (including



1  
2  
3                   symptomatology), which may provide insights into the gut-brain axis and identify novel  
4  
5                   pathogenic mechanisms in these conditions.  
6  
7

- 8                   • A limitation of this research program is that it currently includes a single centre, Sydney  
9                   Children's Hospital Randwick, Australia, however it is a tertiary referral centre for a  
10                   diverse group of children across the state of New South Wales, Australia.  
11  
12                   • A further limitation is the arbitrary sample size targets given the exploratory nature of  
13                   these studies.  
14  
15  
16  
17  
18  
19  
20  
21  
22  
23  
24  
25  
26  
27  
28  
29  
30  
31  
32  
33  
34  
35  
36  
37  
38  
39  
40  
41  
42  
43  
44  
45  
46  
47  
48  
49  
50  
51  
52  
53  
54  
55  
56  
57  
58  
59  
60

For peer review only

## INTRODUCTION

The primary disease burden in childhood has shifted over the last century from infectious to chronic diseases.<sup>1</sup> Chronic childhood diseases, encompassing a wide spectrum of conditions with different pathogeneses, may have long-lasting physical, psychosocial, and economic effects on children and their families.<sup>2 3</sup> The human microbiome is a collection of all microorganisms (bacteria, viruses, archaea and eukaryotes) living in association with the human body.<sup>4</sup> Our understanding of the human microbiomes in health and disease has begun to develop due to the advent of high-throughput sequencing and mass-spectrometry technologies, with the gut emerging as an ecosystem of particular interest. While the effects of an altered gut microbiome (dysbiosis) may not apply to all chronic diseases, there are conditions, disease-related complications and co-morbidities linked to gut microbial dysbiosis. This is especially true in chronic gastrointestinal and respiratory conditions. Affected children are at risk of an imbalanced diet as well as mental health difficulties, which in turn can influence eating behaviours, attitudes and nutritional intake.<sup>5 6</sup> Some of these conditions also require lifelong dietary modifications; for example, cystic fibrosis (CF).<sup>7</sup> Additionally, the complex interaction between microbiota (i.e. bacteria), available nutrients and the immune system is essential in maintaining homeostasis and fighting against invading pathogens at mucosal sites.<sup>8</sup> An important limitation common to most current publications on the human intestinal microbiome in chronic childhood disease(s) is the lack of quantifiable dietary data, as the diet has a marked influence on gut microbiota in health.<sup>9</sup>

The principles and framework of this research program were developed to be applicable to many chronic gastrointestinal and/or respiratory conditions of childhood. Due to the clinical and/or research expertise of the authors and for the purposes of this manuscript, we will describe this program based on three relevant chronic diseases: (i) CF, (ii) obstructive sleep

1  
2  
3 apnoea (OSA), and Hirschsprung's disease (HSCR). These conditions all have reported or  
4 expected changes in their intestinal and/or respiratory microbiomes.  
5  
6  
7  
8  
9

10 CF is the most common life-shortening recessive disease in Caucasians.<sup>10</sup> It is characterised by  
11 intestinal malabsorption, impaired growth and nutrition, and lung disease.<sup>11</sup> In CF, a high  
12 calorie, high fat diet (110-200% of recommended daily energy intake) is advised to prevent  
13 malnutrition and optimise growth.<sup>7</sup> Recent reports suggest that children tend to achieve the  
14 recommended CF diet primarily by overconsumption of energy-dense, nutrient-poor foods  
15 rather than nutrient-dense foods.<sup>12</sup> We have previously reported that children with CF, from as  
16 early as infancy, have alterations in their gut microbiota, impaired innate immunity and  
17 intestinal inflammation.<sup>13-17</sup> We have also observed that poor growth in children with CF is  
18 significantly correlated with the degree of intestinal inflammation.<sup>14</sup> The aetiology of gut  
19 microbial dysbiosis and inflammation in CF remains unclear. It is plausible that dietary intake  
20 plays a role, as enteric fat abundance (from a high-fat diet) may select for a pro-inflammatory  
21 microbiota.<sup>18 19</sup> Alterations in intestinal metabolomic<sup>20</sup> and proteomic<sup>21</sup> profiles have also been  
22 reported. As the life expectancy of CF patients improves, age-related diseases such as  
23 gastrointestinal malignancies and cardiovascular disease (e.g. myocardial infarcts in adults  
24 with CF) are a growing concern.<sup>22</sup> Thus, optimal strategies to optimise health and reduce  
25 disease risk factors need to be determined.  
26  
27  
28  
29  
30  
31  
32  
33  
34  
35  
36  
37  
38  
39  
40  
41  
42  
43  
44  
45  
46  
47  
48

49 In children, OSA can have cardiovascular, neurocognitive and behavioural consequences.<sup>23</sup>  
50 Murine studies suggest intermittent hypoxia, hypercapnia and sleep fragmentation promote  
51 intestinal dysbiosis, increased visceral fat mass, systemic inflammation and atherosclerosis.<sup>24-</sup>  
52  
53  
54  
55  
56  
57  
58  
59  
60

1  
2  
3 rats<sup>28</sup> suggest the possibility of influencing clinical outcomes through affecting the gut  
4 microbiome. In adult studies, OSA is associated with gut epithelial damage,<sup>29</sup> and nasal  
5 dysbiosis and inflammation.<sup>30</sup>  
6  
7  
8  
9

10  
11  
12 HSCR is a congenital disorder where the distal intestine is aganglionic for a variable length.  
13  
14 This results in a functional bowel obstruction that usually presents in newborns. Following  
15 corrective surgery, children often have ongoing intestinal symptoms, and Hirschsprung-  
16 associated enterocolitis (HAEC) remains the most frequent complication. This may result in  
17 frequent hospitalisations and even mortality. Children with and without HAEC often have an  
18 altered intestinal microbiome<sup>31</sup> and altered composition of short chain fatty acids (SCFA).<sup>32</sup>  
19  
20  
21  
22  
23  
24  
25  
26  
27

28  
29 To the best of our knowledge, there are no publications on the intestinal virome (i.e. viruses)  
30 in children with CF, OSA or HSCR. Bacteriophages (viruses which infect bacteria) can  
31 influence bacterial populations via host lysis and horizontal gene transfer, as well as indirectly  
32 regulate immune function and inflammation.<sup>33-36</sup>  
33  
34  
35  
36  
37  
38  
39

40  
41 Despite accumulating evidence linking health, diet and the microbiomes, there is a paucity of  
42 research exploring this simultaneously in the context of chronic paediatric disease.<sup>37</sup>  
43  
44 Furthermore, potential gut-brain<sup>38</sup> and gut-lung<sup>39</sup> axes have yet to be well characterised in these  
45 conditions. Simultaneous, longitudinal studies using an integrated “omics” approach will help  
46 to identify the functional consequences and pathogenic mechanisms that occur within the  
47 altered intestinal and respiratory milieu in chronic conditions. By exploring disease  
48 mechanisms and environmental interactions (e.g. diet) we may in turn develop insights into  
49 potential therapeutic strategies. Additionally, we may be able to identify whether diet may be  
50 amenable to specific modifications which may in turn benefit the intestinal microbiome.  
51  
52  
53  
54  
55  
56  
57  
58  
59  
60

1  
2  
3  
4  
5 The EARTH Program has been established to provide a structured approach to analysing the  
6 gastrointestinal and respiratory microbiomes and diet in children with a chronic gastrointestinal  
7 and/or respiratory condition. The design improves efficiency by recruiting and assessing a  
8 healthy control (HC) group which can be used for comparison against each of the conditions  
9 (as opposed to recruiting a new HC group for each condition). Although our initial design is  
10 focused on CF, OSA and HSCR, the program framework is applicable to other chronic  
11 gastrointestinal and/or respiratory conditions of childhood.  
12  
13  
14  
15  
16  
17  
18  
19  
20  
21  
22

## 23 **OBJECTIVES**

24  
25 The objective of this research program is to evaluate and compare children with a chronic  
26 gastrointestinal and/or respiratory condition and age and gender matched HC. The primary  
27 objectives include analysing the intestinal and respiratory microbiomes (using an integrated  
28 “omics” approach) and dietary intake using validated, parent-report tools (Table 1). The  
29 secondary objectives are also presented in Table 1 and include evaluating:  
30  
31  
32  
33  
34  
35  
36  
37

- 38 1. Known inflammatory biomarkers.
  - 39 2. Symptomatology and health-related quality of life (HRQOL) using validated measures.
  - 40 3. Phenotypic and clinical information.
  - 41 4. Sociodemographic factors
- 42  
43  
44  
45  
46

47 Additional secondary objectives include correlating within children with the same condition:  
48 (i) dietary intake with the intestinal microbiome; (ii) dietary intake with the respiratory  
49 microbiome; and (iii) the intestinal and respiratory microbiomes.  
50  
51  
52  
53  
54  
55

56 We hypothesise that:  
57  
58  
59  
60

- 1  
2  
3 (i) Children with chronic gastrointestinal and/or respiratory conditions will have  
4 altered intestinal and respiratory microbiomes compared to healthy children, and  
5  
6  
7 (ii) Diet plays a key role in influencing the intestinal and respiratory microbiomes and  
8 this may impact on clinical outcomes, biomarkers of disease, and health-related  
9  
10  
11  
12  
13  
14  
15  
16  
17  
18  
19  
20  
21  
22  
23  
24  
25  
26  
27  
28  
29  
30  
31  
32  
33  
34  
35  
36  
37  
38  
39  
40  
41  
42  
43  
44  
45  
46  
47  
48  
49  
50  
51  
52  
53  
54  
55  
56  
57  
58  
59  
60
- (i) Children with chronic gastrointestinal and/or respiratory conditions will have altered intestinal and respiratory microbiomes compared to healthy children, and
  - (ii) Diet plays a key role in influencing the intestinal and respiratory microbiomes and this may impact on clinical outcomes, biomarkers of disease, and health-related quality of life.

To our knowledge, this program will enable the first series of studies comparing the intestinal and respiratory microbiomes and diet in children with chronic gastrointestinal and/or respiratory conditions. Initial results will be hypothesis-generating and used to direct future studies tailored to a specific focus or line of inquiry. Additionally, studies from this research program have potential for direct translation into clinical care as diet is a highly modifiable factor.

| Domain                                    | Data Source                                    | Technique                                             | Outcome Measures                                          | Between Group Analyses*                                                  | Within Group Analyses†                                                                                                                  |                                                     |
|-------------------------------------------|------------------------------------------------|-------------------------------------------------------|-----------------------------------------------------------|--------------------------------------------------------------------------|-----------------------------------------------------------------------------------------------------------------------------------------|-----------------------------------------------------|
| <b>Primary Objectives</b>                 |                                                |                                                       |                                                           |                                                                          |                                                                                                                                         |                                                     |
| 1. Intestinal Microbiome                  | 1. Stool sample                                | Bacterial communities (16S rRNA <sup>13</sup> or MSS) | Alpha diversity (richness and Shannon index)              | Student <i>t</i> -test or Wilcoxon signed-rank test                      | Pearson or Spearman correlations with:<br>• Gastrointestinal microbiome<br>• Respiratory microbiome<br>• Diet<br>• Secondary objectives |                                                     |
|                                           |                                                |                                                       | Beta diversity (UNIFRAC distances <sup>40</sup> )         | PERMANOVA <sup>41</sup>                                                  |                                                                                                                                         |                                                     |
|                                           |                                                |                                                       | Relative abundances of bacteria                           | ANCOM <sup>42</sup>                                                      |                                                                                                                                         |                                                     |
|                                           | 2. Respiratory Microbiome                      | 2. Oropharyngeal swab or sputum sample                | Viral communities (metagenomic sequencing <sup>43</sup> ) | Alpha diversity (richness and Shannon index)                             |                                                                                                                                         | Student <i>t</i> -test or Wilcoxon signed-rank test |
|                                           |                                                |                                                       |                                                           | Beta diversity (Bray-Curtis dissimilarities)                             |                                                                                                                                         | PERMANOVA <sup>41</sup>                             |
|                                           |                                                |                                                       |                                                           | Relative abundances of viruses                                           |                                                                                                                                         | ANCOM <sup>42</sup>                                 |
| Proteomics (LC-MS <sup>21</sup> )         | Protein z-score normalised LFQ intensities     | Student <i>t</i> -test                                |                                                           |                                                                          |                                                                                                                                         |                                                     |
|                                           | Pathway/network upregulation or downregulation | Condition/HC ratio                                    |                                                           |                                                                          |                                                                                                                                         |                                                     |
| Metabolomics (UHPLC-MS/MS <sup>20</sup> ) | Metabolite normalised abundance                | Student <i>t</i> -test                                |                                                           |                                                                          |                                                                                                                                         |                                                     |
|                                           | Pathway/network upregulation or downregulation | Condition/HC ratio                                    |                                                           |                                                                          |                                                                                                                                         |                                                     |
| 3. Diet                                   | i. ACAES (ages 2 to 18yr)                      |                                                       | Energy intake                                             | Student <i>t</i> -test, Wilcoxon signed-rank test or Fisher's Exact Test |                                                                                                                                         |                                                     |
|                                           |                                                |                                                       | Percent energy from core foods                            |                                                                          |                                                                                                                                         |                                                     |
|                                           | ii. 24-hour food recall (ages 0 up to 2yr)     |                                                       | Macronutrient intake                                      |                                                                          |                                                                                                                                         |                                                     |
|                                           | Micronutrient intake                           |                                                       |                                                           |                                                                          |                                                                                                                                         |                                                     |
|                                           | Diet quality score <sup>‡</sup>                |                                                       |                                                           |                                                                          |                                                                                                                                         |                                                     |
| <b>Secondary Objectives</b>               |                                                |                                                       |                                                           |                                                                          |                                                                                                                                         |                                                     |
| 1. Biomarkers                             | Stool, oropharyngeal                           | ELISA                                                 | Inflammation (calprotectin, M2-PK, CRP & interleukins)    | Student <i>t</i> -test, Wilcoxon signed-rank test or Fisher's Exact Test | Descriptive                                                                                                                             |                                                     |

|                                      |                                                                                           |                                                                                             |                                                                          |             |
|--------------------------------------|-------------------------------------------------------------------------------------------|---------------------------------------------------------------------------------------------|--------------------------------------------------------------------------|-------------|
|                                      | swab or sputum sample                                                                     |                                                                                             |                                                                          |             |
| 2. Symptomatology & HRQOL            | PedsQL Infant Scales (0-2yr) & Gastrointestinal Symptoms Module (2-18yr) <sup>44-46</sup> | HRQOL and gastrointestinal symptoms.                                                        | Student <i>t</i> -test, Wilcoxon signed-rank test or Fisher's Exact Test | Descriptive |
|                                      | Rome IV Questionnaire <sup>47 48</sup>                                                    | Gastrointestinal symptoms                                                                   |                                                                          |             |
|                                      | Spence Children's Anxiety Scale <sup>49 50</sup>                                          | Anxiety symptoms                                                                            |                                                                          |             |
|                                      | Short Mood and Feelings Questionnaires <sup>51 52</sup>                                   | Depressive symptoms                                                                         |                                                                          |             |
| 3. Phenotypic & Clinical Information | Anthropometrics                                                                           | Z-scores; weight, length/height, weight-for-length (ages 0 to 2yr) and BMI (ages 2 to 20yr) | Student <i>t</i> -test, Wilcoxon signed-rank test or Fisher's Exact Test | Descriptive |
|                                      | Clinical presentations                                                                    | Number and length of hospitalisations, emergency department presentations                   |                                                                          |             |
|                                      | Results                                                                                   | Biochemistry, microbiology and imaging results                                              | Descriptive                                                              |             |
|                                      | Perinatal factors                                                                         | Mode of delivery, feeding during infancy                                                    |                                                                          |             |
| 4. Socio-demographic factors         |                                                                                           | Ethnicity                                                                                   | Descriptive                                                              | Descriptive |

**Table 1.** Primary and secondary objectives with related outcome measures. \*Between group analyses describe comparisons between a condition and healthy control groups. †Within group analyses describe analyses of two outcome measures within subjects of the same condition group. ‡ACAES only. ACAES, Australian Child and Adolescent Eating Survey; CRP, C-reactive protein; ELISA, enzyme-linked immunosorbent assay; HC, healthy control; LC-MS, liquid chromatography-mass spectrometry; HRQOL, health-related quality of life; MSS, metagenomic shotgun sequencing; M2-PK, M2 pyruvate kinase; PERMANOVA, permutational multivariate analysis of variance.



## METHODS AND ANALYSES

### Study design

The EARTH program provides a framework for a series of prospective, longitudinal, controlled, observational studies, with each individual study comparing children with a chronic gastrointestinal and/or respiratory condition to HC. A single healthy control group will be used for comparison against all conditions. The standardised methodological approach will also allow for comparisons between different health conditions. The SPIRIT reporting guidelines were used for this protocol.<sup>53</sup>

### Setting

Studies will be carried out at a single centre; the Sydney Children's Hospital (SCH) in Randwick, Australia. SCH is a tertiary paediatric hospital.

### Participants

Children are eligible if they:

- Are aged between 0 and 18 years;
- Have been diagnosed with a chronic gastrointestinal and/or respiratory condition defined by consensus diagnostic criteria; or
- Are free of any chronic health condition (healthy control group); and
- Have a parent(s)/carer(s) who provides informed consent, or are at least 16 years old and provide informed consent.

Ineligibility criteria include:

- Children with more than one concurrent or unrelated chronic disease;
- Inability to comply with study requirements;

- Parent(s)/guardian(s) are unable to speak English or do not have a reading level age of at least 12 years.

Participants with a chronic gastrointestinal and/or respiratory condition will be matched to a HC for gender and age (as closely as possible).

### **Recruitment Strategy**

Participants with chronic gastrointestinal and/or respiratory conditions will be approached at their routine clinic appointments in the outpatient department. Flyers will be placed in the hospital for recruitment of HC. Prior to study participation, detailed written and verbal information will be provided about the content and extent of the study. Written informed consent from the parent/legal guardian of each participant will be required. If the child is deemed Gillick competent,<sup>54</sup> they will be encouraged to sign a specific child assent form. Parents/legal guardians and participants may withdraw consent at any time.

### **Outcome Measures**

The outcomes measures are presented in Table 1. Presented below is a simplified explanation of each outcome/variable included in the research program.

#### *Primary outcomes/variables*

1. Intestinal microbiome assessed from a stool sample using one or more of:
  - i. Bacterial community analysis (16S rRNA<sup>13</sup> or metagenomic shotgun sequencing):
    - a. Alpha diversity indices:
      - (i) Richness: the total number of unique species.<sup>55</sup>

- 1  
2  
3 (ii) Shannon index: a measure of both species abundance and  
4  
5 evenness.<sup>56</sup>  
6  
7  
8 b. Beta diversity indices:  
9  
10 (i) UniFrac: a distance metric used to compare biological  
11  
12 communities that incorporates phylogenetic distances between  
13  
14 observed organisms.<sup>40</sup>  
15  
16  
17 (ii) Bray-Curtis dissimilarity: a count metric used to quantify the  
18  
19 compositional dissimilarity between two different sites.<sup>57</sup>  
20  
21  
22 c. Relative abundance: the percent composition of an organism relative to  
23  
24 the total number of organisms in the area.<sup>58</sup>  
25  
26  
27 ii. Viral community analysis (metagenomic sequencing<sup>43</sup>), as above for bacterial  
28  
29 community analysis.  
30  
31 iii. Proteomics (liquid chromatography-mass spectrometry (LC-MS)<sup>21</sup>):  
32  
33 a. Protein z-score normalised label-free quantification (LFQ) intensities.  
34  
35 b. Pathway/network upregulation or downregulation based on the ratio of  
36  
37 condition/HC.  
38  
39  
40 iv. Metabolomics (ultra-high performance liquid chromatography-tandem mass  
41  
42 spectrometry (UHPLC-MS/MS)<sup>20</sup>):  
43  
44 a. Metabolite normalised abundance.  
45  
46 b. Pathway/network upregulation or downregulation based on the ratio of  
47  
48 condition/HC.  
49  
50  
51 2. Respiratory microbiome assessed from an oropharyngeal swab or sputum sample, using  
52  
53 one or more of the techniques listed above (1a–d).  
54  
55  
56 i. A sputum sample will be obtained in children able to expectorate and an  
57  
58 oropharyngeal swab will be collected in children unable to expectorate.  
59  
60

- 1  
2  
3  
4  
5  
6  
7  
8  
9  
10  
11  
12  
13  
14  
15  
16  
17  
18  
19  
20  
21  
22  
23  
24  
25  
26  
27  
28  
29  
30  
31  
32  
33  
34  
35  
36
3. Dietary intake assessed using a validated semi-quantitative food frequency questionnaire (FFQ):
    - i. For participants aged 0 up to 2 years, a 24-hour food recall:
      - a. Energy intake, percentage energy from core foods, macronutrient intake (total intake and proportion of energy intake) and micronutrient intake (total intake and proportion of energy intake).
    - ii. For participants aged 2 to 18 years, the Australian Child and Adolescent Eating Survey (ACAES).<sup>59-62</sup> The ACAES is a validated food frequency questionnaire (120 items, semi quantitative) used to quantify food and nutrient intake over the preceding six months, developed and validated for use in Australian children:
      - a. Energy intake, percentage energy from core foods, macronutrient intake (total intake and proportion of energy intake), micronutrient intake (total intake and proportion of energy intake) and overall diet quality score.

37  
38  
39  
40  
41  
42  
43  
44  
45  
46  
47  
48  
49  
50  
51  
52  
53  
54  
55  
56  
57  
58  
59  
60

*Secondary outcomes/variables*

1. Faecal and respiratory inflammatory biomarkers, such as calprotectin, M2 pyruvate kinase (M2-PK), C-reactive protein (CRP) and interleukins.
2. Symptomatology and health-related quality of life (HRQOL) will be collected directly from children where age-appropriate measures exist and/or parents using age-appropriate measures:
  - a. PedsQL Infant Scales (0-2yr) & Gastrointestinal Symptoms Module (2-18yr)<sup>44-46</sup> (HRQOL and gastrointestinal symptoms).
  - b. Rome IV Questionnaire<sup>47 48</sup> (gastrointestinal symptoms). Designed to diagnose functional gastrointestinal disorders, which are defined as disorders of the gut-brain interaction in children aged 0 to 18 years. These criteria capture

gastrointestinal symptoms which are relevant to motility disturbance, visceral hypersensitivity, altered mucosal and immune function, altered gut bacteria and altered central nervous system processing;

- c. Spence Children's Anxiety Scale<sup>49 50</sup> (anxiety symptoms);
  - d. Short Mood and Feelings Questionnaires<sup>51 52</sup> (depressive symptoms).
3. Anthropometrics, including z-scores for weight, length/height, weight-for-length (ages 0 to 2 years) and body mass index (BMI) (ages 2 to 20 years).
  4. Z-scores; weight, length/height, weight-for-length (ages 0 to 2yr) and BMI (ages 2 to 20yr)
  5. Clinical information and biochemical results obtained through routine care, such as number and length of hospitalisations, emergency department presentations, perinatal factors (mode of delivery, feeding type(s) in infancy), biochemistry, microbiology and imaging results;
  6. Sociodemographic factors such as ethnicity.

## Procedures

Each participant will be assessed on three occasions over a 12-month period; at study entry, 6- and 12-month follow-up. At each time-point, the following will be collected:

- A stool sample;
- An oropharyngeal swab or sputum sample (a sputum sample will be obtained in children able to expectorate and an oropharyngeal swab will be collected in children unable to expectorate);
- Dietary intake measured using the ACAES (2 to 18 years) or 24-hour food recall (0 up to 2 years);
- A secure, password-protected online survey comprising:

- i. PedsQL Infant Scales (0-2yr) & Gastrointestinal Symptoms Module (2-18yr),<sup>44-46</sup> tailored to age;
  - ii. Rome IV Questionnaire<sup>47 48</sup> (0 to 18 years);
  - iii. Spence Children's Anxiety Scale<sup>49 50</sup> (3 to 18 years);
  - iv. Short Mood and Feelings Questionnaires<sup>51 52</sup> (6 to 18 years);
  - v. Clinical and biochemical results obtained through routine care and hospitalisations (if available);
  - vi. Sociodemographic factors (baseline survey only);
- Anthropometrics: height, weight and BMI z-scores.

#### *Details regarding sample and data collection*

Stool samples will be collected in a sterile specimen jar using a Feces Catcher (Abbexa Ltd, Cambridge, UK). Sputum samples will be collected from children who are able to expectorate and oropharyngeal swabs will be collected in those children who cannot expectorate sputum. All samples will be transported in a cooler bag (with a -18°C ice pack) to the hospital laboratory within 24 hours of collection. Stool, oropharyngeal swab and sputum samples will be aliquoted and stored at -80 °C.

For children aged 0 up to 2 years, a 24-hour dietary recall will be conducted by a study dietician. For children aged 2 to 18 years, the ACAES will be completed online by parents/guardians or by the child themselves if aged over 14 years.

Participant clinical information and questionnaires will be collected using the Qualtrics Online Survey Software Tool ([www.qualtrics.com](http://www.qualtrics.com)), which is distributed via a secure email link. Qualtrics is a secure, password-protected platform, which allows for the distribution of

1  
2  
3 electronic surveys and collection of data. The surveys are programmed to be condition/control-  
4 specific and facilitate a personalised flow depending on the time-point of the study and the age  
5 of the participant (to facilitate administration of age-appropriate questionnaires). Further  
6 details on each of the measures used for evaluating symptomatology and HRQOL are presented  
7 in Table 2. Clinical and biochemical results will be obtained via the SCH electronic medical  
8 record system and recorded in a Qualtrics survey.  
9  
10  
11  
12  
13  
14  
15  
16  
17  
18

19 Participants will be measured for their height and weight using standardised methods.  
20  
21  
22  
23  
24  
25  
26  
27  
28  
29  
30  
31  
32  
33  
34  
35  
36  
37  
38  
39  
40  
41  
42  
43  
44  
45  
46  
47  
48  
49  
50  
51  
52  
53  
54  
55  
56  
57  
58  
59  
60

| Measure                                                                                                             | Domains (Items)                                                                                                                                                                                                                                                                                                                                                            | Scoring                                                                     | Interpretation                         |
|---------------------------------------------------------------------------------------------------------------------|----------------------------------------------------------------------------------------------------------------------------------------------------------------------------------------------------------------------------------------------------------------------------------------------------------------------------------------------------------------------------|-----------------------------------------------------------------------------|----------------------------------------|
| <b><i>i. PedsQL</i></b>                                                                                             |                                                                                                                                                                                                                                                                                                                                                                            |                                                                             |                                        |
| Infant Scales - Parent report for infants (ages 1-12 months) <sup>46</sup>                                          | Total (36): 5-point LS. Physical Functioning (6), Physical Symptoms (10), Emotional Functioning (12), Social Functioning (4), Cognitive Functioning (4).                                                                                                                                                                                                                   | Items are reverse scored and linearly transformed on a scale from 0 to 100. | Higher scores indicate better HRQOL    |
| Infant Scales - Parent report for infants (ages 13-24 months) <sup>46</sup>                                         | Total (45): 5-point LS. Physical Functioning (9), Physical Symptoms (10), Emotional Functioning (12), Social Functioning (5), Cognitive Functioning (9).                                                                                                                                                                                                                   | Items are reverse scored and linearly transformed on a scale from 0 to 100. | Higher scores indicate better HRQOL    |
| 3.0 Gastrointestinal Symptoms Module – Parent report for toddlers (ages 2-4) <sup>44 45</sup>                       | Total (74): 5-point LS. Stomach Pain and Hurt (6), Stomach Discomfort When Eating (5), Food and Drink Limits (6), Trouble Swallowing (3), Heart Burn and Reflux (4), Nausea and Vomiting (4), Gas and Bloating (7), Constipation (14), Blood in Poop (2), Diarrhoea (7), Worry About Going Poop (5), Worry About Stomach Aches (2), Medicines (4), Communication (5).      | Items are reverse scored and linearly transformed on a scale from 0 to 100. | Higher scores indicate lower problems. |
| Gastrointestinal symptoms module (Acute Version 3.0) – Parent report for young children (ages 5-7) <sup>44 45</sup> | Total (74): 3- & 5-point LS. Stomach Pain and Hurt (6), Stomach Discomfort When Eating (5), Food and Drink Limits (6), Trouble Swallowing (3), Heart Burn and Reflux (4), Nausea and Vomiting (4), Gas and Bloating (7), Constipation (14), Blood in Poop (2), Diarrhoea (7), Worry About Going Poop (5), Worry About Stomach Aches (2), Medicines (4), Communication (5). | Items are reverse scored and linearly transformed on a scale from 0 to 100. | Higher scores indicate lower problems. |
| Gastrointestinal symptoms module (Acute Version 3.0) – Young child report (ages 5-7) <sup>44 45</sup>               |                                                                                                                                                                                                                                                                                                                                                                            |                                                                             |                                        |
| Gastrointestinal symptoms module (Acute Version 3.0) – Parent                                                       | Total (74): 3- & 5-point LS. Stomach Pain and Hurt (6), Stomach Discomfort When Eating (5), Food and Drink Limits (6),                                                                                                                                                                                                                                                     | Items are reverse scored and linearly transformed on a scale                | Higher scores indicate lower problems. |



1  
2  
3  
4  
5  
6  
7  
8  
9  
10  
11  
12  
13  
14  
15  
16  
17  
18  
19  
20  
21  
22  
23  
24  
25  
26  
27  
28  
29  
30  
31  
32  
33  
34  
35  
36  
37  
38  
39  
40  
41  
42  
43  
44  
45  
46

|                                                                                                              |                                                                                                                                                                                                                                          |                                                                                                                                                                                                                                                                                                                                                                                                              |  |
|--------------------------------------------------------------------------------------------------------------|------------------------------------------------------------------------------------------------------------------------------------------------------------------------------------------------------------------------------------------|--------------------------------------------------------------------------------------------------------------------------------------------------------------------------------------------------------------------------------------------------------------------------------------------------------------------------------------------------------------------------------------------------------------|--|
| report for children (ages 8-12) <sup>44 45</sup>                                                             | (4), Nausea and Vomiting (4), Gas and Bloating (7), Constipation (14), Blood in Poop (Bowel Movement) (2), Diarrhoea (7), Worry About Going Poop (Bowel Movements) (5), Worry About Stomach Aches (2), Medicines (4), Communication (5). |                                                                                                                                                                                                                                                                                                                                                                                                              |  |
| Gastrointestinal symptoms module (Acute Version 3.0) – Child report (ages 8-12) <sup>44 45</sup>             |                                                                                                                                                                                                                                          |                                                                                                                                                                                                                                                                                                                                                                                                              |  |
| Gastrointestinal symptoms module (Acute Version 3.0) – Parent report for teens (ages 13-18) <sup>44 45</sup> |                                                                                                                                                                                                                                          |                                                                                                                                                                                                                                                                                                                                                                                                              |  |
| Gastrointestinal symptoms module (Acute Version 3.0) – Teens report (ages 13-18) <sup>44 45</sup>            |                                                                                                                                                                                                                                          |                                                                                                                                                                                                                                                                                                                                                                                                              |  |
| <b>ii. Rome IV</b>                                                                                           |                                                                                                                                                                                                                                          |                                                                                                                                                                                                                                                                                                                                                                                                              |  |
| Rome IV – Parent-Report Form for Infants and Toddlers (ages 0-3) (R49QG-toddler) <sup>47</sup>               | Total (29 for ages 0-12 months; 18 for ages 1-3 years):<br>Infant gastrointestinal problems (11), Vomiting (9), Bowel Movements (9)                                                                                                      | Defined diagnostic criteria for functional gastrointestinal disorders in neonates and toddlers: <sup>47</sup><br>Infant regurgitation, Infant rumination syndrome, Cyclic vomiting syndrome, Infant colic, Functional diarrhoea, Infant dyschezia, Functional constipation.                                                                                                                                  |  |
| Parent-Report Form for Children and Adolescents (4 years of age and older) (R4PDQ-child) <sup>48</sup>       | Total (42):<br>Belly ache and uncomfortable feelings above the belly button (12), Belly aches and abdominal pain around and below the belly button (10), Bowel movements (7), Nausea and vomiting (9), Other symptoms (4).               | Defined diagnostic criteria for functional gastrointestinal disorders in children and adolescents: <sup>48</sup><br>Cyclic vomiting syndrome, Functional nausea and functional vomiting, Rumination syndrome, Aerophagia, Functional dyspepsia, Irritable bowel syndrome, Abdominal migraine, Functional abdominal pain – not otherwise specified, Functional Constipation, Nonretentive fecal incontinence. |  |
| Self-Report Form for Children and Adolescents (10 years of age and older) (R4PDQ-child) <sup>48</sup>        |                                                                                                                                                                                                                                          |                                                                                                                                                                                                                                                                                                                                                                                                              |  |
| <b>iii. Spence Children’s Anxiety Scale</b>                                                                  |                                                                                                                                                                                                                                          |                                                                                                                                                                                                                                                                                                                                                                                                              |  |

|                                                                                                         |                                                                                                                                                                                                                                        |                                                                                                     |                                                                                                                                                                                                                 |
|---------------------------------------------------------------------------------------------------------|----------------------------------------------------------------------------------------------------------------------------------------------------------------------------------------------------------------------------------------|-----------------------------------------------------------------------------------------------------|-----------------------------------------------------------------------------------------------------------------------------------------------------------------------------------------------------------------|
| Spence – Preschool Anxiety Scale (Parent Report) (ages 0 to 4) <sup>49 50</sup>                         | Total (34): 5-point LS.<br>Generalized anxiety (5), Social anxiety (6), Obsessive compulsive disorder (5), Physical injury fears (7), Separation anxiety (5).                                                                          | Responses are scored 0 (Not true at all) to 4 (very often true). A maximum possible score of 112.   | A score 1 SD above mean for a subscale or total score warrants further clinical investigation. A score of 0.5 SD above the mean on total score is indicative of an elevated, but not clinical level of anxiety. |
| Spence Children’s Anxiety Scale (Parent Report) (5 years and older) <sup>49 50</sup>                    | Total (38 scored, 39 total): 4-point LS.<br>Panic attack and agoraphobia (9), Separation anxiety (6), Physical injury fears (5), Social phobia (6), Obsessive compulsive (6), Generalized anxiety disorder / overanxious disorder (6). | Responses are scored 0 (Never) to 3 (Always). A maximum possible score of 114. T-score calculation. | A score 1 SD above mean (T-score of $\geq 60$ ) for a subscale or total score is indicative of subclinical or elevated levels of anxiety warranting further clinical investigation.                             |
| Spence Children’s Anxiety Scale (8 years and older) <sup>49 50</sup>                                    | Total (38 scores, 45 total): 4-point LS.<br>Separation anxiety (6), Social phobia (6), Obsessive compulsive (6), Panic attack and agoraphobia (9), Physical injury fears (5), Generalized anxiety (6).                                 |                                                                                                     |                                                                                                                                                                                                                 |
| <b><i>iv. Short Mood and Feelings Questionnaire</i></b>                                                 |                                                                                                                                                                                                                                        |                                                                                                     |                                                                                                                                                                                                                 |
| Mood and Feelings Questionnaire: Short Version (Parent Report on Child) (ages 6-18) <sup>51 52 63</sup> | Total (13): 3-point LS.<br>Depressive symptoms (13).                                                                                                                                                                                   | Responses are scored 0 (Not true) to 2 (True). A maximum possible score of 26.                      | Higher scores suggest more severe depressive symptoms. A score of $\geq 12$ may indicate the presence of depression in the respondent.                                                                          |
| Mood and Feelings Questionnaire: Short Version (Child Self-Report) (ages 6-18) <sup>51 52 63</sup>      | Total (13): 3-point LS.<br>Depressive symptoms (13).                                                                                                                                                                                   |                                                                                                     |                                                                                                                                                                                                                 |

**Table 2.** Measures for symptomatology and health-related quality of life (HRQOL). LS, Likert scale; SD, standard deviation. N.B. Disease-specific questionnaires can be added into the Qualtrics data collection form i.e. the Paediatric Sleep Questionnaire: Sleep-Disordered Breathing Subscale,<sup>64</sup> for children with OSA.

### *Sample and data processing techniques*

Processing of stool, oropharyngeal swab and sputum samples is almost identical (sparing a few initial sample preparation steps). For bacterial community analysis, DNA will be extracted using QIAamp DNA kits (QIAGEN, Hildren, Germany) according to manufacturer's instructions. For 16S rRNA gene analysis specifically, amplification will be performed with primers 515F and 806R spanning the V4 region and sequencing data will be processed using USEARCH.<sup>65</sup>

For metagenomic shotgun sequencing (alternative to 16S rRNA gene sequencing), no amplification step will be performed prior to sequencing. Sequencing data will be processed using a custom in-house pipeline.

For viral community analysis specifically, sample preparation will follow an adjusted NetoVIR (Novel Enrichment Technique Of VIRomes) protocol.<sup>43</sup> All sequencing will be performed using the Illumina MiSeq platform at the Ramaciotti Centre for Genomics at the University of New South Wales (UNSW). Briefly, sequencing data will be processed using the Vipie platform<sup>66</sup> for taxonomic assignment and Virsorter pipeline<sup>67</sup> for functional annotation.

For untargeted proteomics, samples will undergo an adjusted Debyser et al. protocol for protein extraction, gel electrophoresis and analysed using LC-MS/MS at the Bioanalytical Mass Spectrometry Facility (BMSF), UNSW.<sup>21</sup> Briefly, proteomics data will be analysed using MaxQuant<sup>68</sup> and Ingenuity Pathway Analysis (Qiagen).

For untargeted metabolomics, metabolites will be extracted in 1:1 (v:v) acetonitrile:H<sub>2</sub>O and analysed using a U3000 UHPLC system coupled to a Q-Exactive mass spectrometer (MS;

1  
2  
3 ThermoFisher Scientific) at the BMSF, UNSW. Briefly, metabolomics data will be analysed  
4  
5 using Progenesis COMET (Waters/NonLinear Dynamics).  
6  
7  
8  
9

10 Faecal and respiratory biomarkers (listed above) will be measured using enzyme-linked  
11  
12 immunosorbent assays (ELISA).  
13  
14  
15  
16

17 Nutrient intake data from the ACAES and 24-hour recall is computed using FoodWorks  
18  
19 (Version 3.02.581) and the following databases: Australian AusNut 1999 database (All Foods)  
20  
21 Revision 14 and AusFoods (Brands) Revision 5 (Xyris Software (Australia) Pty Ltd,  
22  
23 FoodWorks Professional Version 3.02.581. 2004: Brisbane Australia). Outputs include a  
24  
25 quantified estimate a wide of range of macro- (protein, fat, carbohydrate) and micro-nutrients  
26  
27 (vitamins A, B, C and minerals such as iron, zinc and calcium). In addition, overall diet quality  
28  
29 score and the percentage of energy derived from nutrient rich core foods and energy-dense,  
30  
31 nutrient-poor discretionary foods is calculated.  
32  
33  
34  
35  
36  
37

#### 38 *Administration of patient records and data*

39  
40 At the time of consent and enrolment, participants will be assigned a unique study ID number  
41  
42 (9 alphanumeric characters). All patient records, samples and data are deidentified using the  
43  
44 unique study ID. Data will be stored securely as per ethics review board guidelines.  
45  
46  
47  
48

#### 49 *Handling of abnormal outcomes or distress*

50  
51 The well-being of participants is of utmost importance. Participants and their parents/guardians  
52  
53 will be advised to contact any of the study investigators if they have concerns regarding any  
54  
55 aspects of their participation. It is possible that thinking about one's health or the health of  
56  
57 one's child may elicit emotional distress in some participants. Depending on the nature of the  
58  
59  
60

1  
2  
3 concern or level of distress communicated, a relevant study investigator will contact the  
4 participant and/or his or her primary caregiver by telephone or in-person to assess any concerns  
5 and arrange appropriate follow-up or referral as soon as possible. Additionally, all Participant  
6 Information Sheets will provide the details for several, free, age-appropriate 24-hour  
7 telephone-based support services. All individuals will be clearly informed that choosing not to  
8 take part in the study, or withdrawing from the study at any stage, will not adversely affect  
9 their or their child's health care or relationship with hospital staff in any way.  
10  
11  
12  
13  
14  
15  
16  
17  
18  
19  
20

### 21 **Bias, confounding factors and handling of missing data**

22  
23 The single-centre nature of this study is a limitation due to the restricted recruitment pool  
24 available and potential for selection bias; however, SCH is a tertiary referral centre for a diverse  
25 group of children across the state of New South Wales, which is the most populous state in  
26 Australia. Age and gender are known confounding factors for microbiome analyses and are  
27 controlled for with matching. Additional confounding factors for microbiome analyses include  
28 perinatal factors and ethnicity, for which sensitivity analyses will be performed. Condition  
29 specific medications (e.g. pancreatic enzyme replacement therapy or antibiotic therapy in CF)  
30 are potential confounders and attempts to control for these factors will be made at the analysis  
31 stage. Missing data will be treated as missing and accounted for using linear mixed models (see  
32 statistical methods below).  
33  
34  
35  
36  
37  
38  
39  
40  
41  
42  
43  
44  
45  
46  
47  
48  
49

### 50 **Study size**

51 In an exploratory research program of this nature, with multiple conditions of interest, sample  
52 size calculations for the primary outcomes are difficult. As an initial, arbitrary target, three  
53 males and three females in each of the following age ranges (0 to 5, >5 to 10, >10 to 18 years)  
54 will be recruited to account for age- and gender-related changes in microbiomes and diet. This  
55  
56  
57  
58  
59  
60

1  
2  
3 calculation assumes that six participants will be required for most statistical tests of interest  
4 and an analysis can be performed on the smallest subgroup (e.g. six CF vs. six HC children  
5 aged 0 to 5 years). Therefore 18 participants for each condition and 18 HC (which can be used  
6 for comparison against multiple conditions) are an initial target sample size. Initial data from  
7 this sample size can then be utilised for subsequent power-focused study designs.  
8  
9  
10  
11  
12  
13  
14  
15  
16

### 17 **Statistical methods**

18  
19 Statistical analyses will be performed in R v3.4.4. All outcome measures will be analysed  
20 cross-sectionally and temporally. Descriptive statistics will be calculated for all outcome  
21 parameters for each cohort according to normality of distribution. Given the sample size,  
22 categorical variables will be compared using Fisher's Exact Test. Continuous variables will be  
23 analysed according to distribution with a student *t*-test or Wilcoxon signed-rank test for  
24 parametric and non-parametric data, respectively. A linear random-effects mixed model or  
25 variant of generalised linear-mixed model will be utilised to evaluate cross-sectional and  
26 temporal differences in outcome measures. This technique will allow for control of  
27 confounders and treatment of missing data as missing. Correlations between two continuous  
28 variables will be performed using Pearson or Spearman correlations according to distribution.  
29 Alpha diversity indices will be measured by richness (number of taxa) and Shannon index.  
30 Phylogeny- and taxonomy-based beta diversity will be calculated using UNIFRAC distances<sup>40</sup>  
31 and Bray-Curtis dissimilarities, respectively, and used to generate non-metric  
32 multidimensional scaling (NMDS) plots. Permutational multivariate analysis of variance  
33 (PERMANOVA) tests (permutations = 1000) will be utilised to test if beta diversity  
34 significantly differs between groups and age using the vegan function *adonis*.<sup>41</sup> A significant  
35 difference in abundance of taxa, proteins or metabolites between groups will be assessed using  
36 the ANCOM package v1.1-3.<sup>42</sup> For all analyses,  $p < 0.05$  (two-tailed) is considered significant  
37  
38  
39  
40  
41  
42  
43  
44  
45  
46  
47  
48  
49  
50  
51  
52  
53  
54  
55  
56  
57  
58  
59  
60

1  
2  
3 except in the instance of multiple comparisons, in which case a Benjamini & Hochberg  
4  
5 correction will be applied and  $q < 0.05$  will be considered significant.  
6  
7  
8  
9

## 10 11 **ETHICS AND DISSEMINATION**

12  
13 The EARTH Research Program received ethics approval from the Sydney Children's Hospitals  
14  
15 Network Human Research Ethics Committee (HREC/18/SCHN/26). Any amendment to the  
16  
17 protocol which may impact the conduct of the study will be approved by the ethics committee  
18  
19 before implementation.  
20  
21  
22  
23

24  
25 The results of studies from this research program will be presented in international conferences  
26  
27 and will be published in peer-reviewed journals. Findings may also be presented as: (i) easy-  
28  
29 to-read summaries for participants and the community; (ii) educational lectures and seminars  
30  
31 for patients, families and the community; (iii) website and social media postings; (iv)  
32  
33 newsletter updates for study participants; (v) reports for relevant advocacy groups and funding  
34  
35 partners.  
36  
37  
38  
39  
40  
41

## 42 **EXPECTED OUTCOMES AND SIGNIFICANCE OF THE RESEARCH** 43 44 45 **PROJECT**

46  
47 To our knowledge the EARTH Research Program will be the first in children with a chronic  
48  
49 gastrointestinal and/or respiratory condition to simultaneously evaluate dietary intake and the  
50  
51 intestinal and respiratory microbiomes. By exploring disease mechanisms and environmental  
52  
53 interactions (i.e. diet) we may in turn develop insights into potential therapeutic strategies.  
54  
55 Studies from this program have the potential for direct translation into clinical care as diet is a  
56  
57 highly modifiable factor. This program also provides a structured approach for performing  
58  
59  
60

1  
2  
3 prospective, longitudinal, controlled, observational studies which can be simultaneously  
4 applied to multiple health conditions, and utilised a universal control cohort.  
5  
6  
7  
8  
9

### 10 **Acknowledgements**

11  
12 The authors thank the future parents and families of our children at SCH and our healthy  
13 participants. We thank the Westfield Research Lab SCH (Dr Steven Leach), the Ramaciotti  
14 Centre for Genomics, UNSW Sydney, the Bioanalytical Mass Spectrometry Facility, UNSW  
15 Sydney (Dr Ling Zhong, Dr Nadeem Kaakoush and Dr Russell Pickford), the Virology  
16 Research Laboratory at Prince of Wales Hospital, the School of Biological, Earth and  
17 Environmental Sciences (Dr Bernd Wemheuer), and the School of Women's and Children's  
18 Health, Faculty of Medicine, UNSW Sydney (Equipment Grant 2018).  
19  
20  
21  
22  
23  
24  
25  
26  
27  
28  
29  
30  
31

### 32 **Author Contributions**

33  
34 MJC, TK and CYO jointly conceived and designed the research program. MJC wrote the study  
35 protocol. IRM, MD, SC, SA, SSB, SW, NK, TT and AJ refined the research program design.  
36  
37 All authors will take part in study conduct, recruitment, data management and/or analysis.  
38  
39 MJC, IRM and CYO prepared this manuscript and all authors read and approved the final  
40 version.  
41  
42  
43  
44  
45  
46  
47  
48

### 49 **Funding Statement**

50  
51 This is an investigator-initiated research program. Funding to support medical research  
52 students is available through the Independent Learning Project scheme (involves a research  
53 term for medical students) at the University of New South Wales Sydney. Additional funding  
54 will be sought through seed grants. Dr Coffey is the recipient of the Sydney Children's Hospital  
55  
56  
57  
58  
59  
60



1  
2  
3 Foundation PhD Scholarship and the Australian Government Department of Education and  
4 Training Australian Postgraduate Award. A/Prof Kasparian is the recipient of a National Heart  
5 Foundation of Australia Future Leader Fellowship (101229), and a 2018-2019 Harkness  
6 Fellowship in Health Care Policy and Practice from the Commonwealth Fund.  
7  
8  
9  
10  
11  
12  
13  
14  
15

### 16 **Competing interests**

17  
18 The authors declare no competing interests.  
19  
20  
21

### 22 **Data Sharing**

23  
24 De-identified participant data that underlies the results of publications from the EARTH  
25 program will be shared with investigators whose proposed use of the data has been approved  
26 by an independent review committee.  
27  
28  
29  
30  
31  
32  
33  
34  
35  
36  
37  
38  
39  
40  
41  
42  
43  
44  
45  
46  
47  
48  
49  
50  
51  
52  
53  
54  
55  
56  
57  
58  
59  
60

## REFERENCES

1. Burns KH, Casey PH, Lyle RE, et al. Increasing prevalence of medically complex children in US hospitals. *Pediatrics* 2010;126(4):638-46. doi: 10.1542/peds.2009-1658 [published Online First: 2010/09/22]
2. Satterwhite BB. Impact of chronic illness on child and family: an overview based on five surveys with implications for management. *International journal of rehabilitation research Internationale Zeitschrift für Rehabilitationsforschung Revue internationale de recherches de readaptation* 1978;1(1):7-17. [published Online First: 1978/01/01]
3. Wijlaars LP, Gilbert R, Hardelid P. Chronic conditions in children and young people: learning from administrative data. *Archives of disease in childhood* 2016;101(10):881-5. doi: 10.1136/archdischild-2016-310716 [published Online First: 2016/06/02]
4. Peterson J, Garges S, Giovanni M, et al. The NIH Human Microbiome Project. *Genome research* 2009;19(12):2317-23. doi: 10.1101/gr.096651.109 [published Online First: 2009/10/13]
5. Pinquart M, Shen Y. Depressive symptoms in children and adolescents with chronic physical illness: an updated meta-analysis. *Journal of pediatric psychology* 2011;36(4):375-84. doi: 10.1093/jpepsy/jsq104 [published Online First: 2010/11/23]
6. Conviser JH, Fisher SD, McColley SA. Are children with chronic illnesses requiring dietary therapy at risk for disordered eating or eating disorders? A systematic review. *The International journal of eating disorders* 2018;51(3):187-213. doi: 10.1002/eat.22831 [published Online First: 2018/02/23]
7. Saxby N, Painter C, Kench A, et al. Nutrition Guidelines for Cystic Fibrosis in Australia and New Zealand, ed. Scott C. Bell, Thoracic Society of Australia and New Zealand. Sydney2017.
8. Statovci D, Aguilera M, MacSharry J, et al. The Impact of Western Diet and Nutrients on the Microbiota and Immune Response at Mucosal Interfaces. *Frontiers in immunology* 2017;8:838. doi: 10.3389/fimmu.2017.00838 [published Online First: 2017/08/15]
9. Valdes AM, Walter J, Segal E, et al. Role of the gut microbiota in nutrition and health. *BMJ (Clinical research ed)* 2018;361:k2179. doi: 10.1136/bmj.k2179 [published Online First: 2018/06/15]
10. Farrell PM, Rosenstein BJ, White TB, et al. Guidelines for diagnosis of cystic fibrosis in newborns through older adults: Cystic Fibrosis Foundation consensus report. *The Journal of pediatrics* 2008;153(2):S4-S14. doi: 10.1016/j.jpeds.2008.05.005 [published Online First: 2008/07/22]
11. Massie RJ, Olsen M, Glazner J, et al. Newborn screening for cystic fibrosis in Victoria: 10 years' experience (1989-1998). *The Medical journal of Australia* 2000;172(12):584-7. [published Online First: 2000/07/29]
12. Sutherland R, Katz T, Liu V, et al. Dietary intake of energy-dense, nutrient-poor and nutrient-dense food sources in children with cystic fibrosis. *Journal of cystic fibrosis : official journal of the European Cystic Fibrosis Society* 2018;17(6):804-10. doi: 10.1016/j.jcf.2018.03.011 [published Online First: 2018/05/05]
13. Nielsen S, Needham B, Leach ST, et al. Disrupted progression of the intestinal microbiota with age in children with cystic fibrosis. *Scientific reports* 2016;6:24857. doi: 10.1038/srep24857 [published Online First: 2016/05/05]
14. Dhaliwal J, Leach S, Katz T, et al. Intestinal inflammation and impact on growth in children with cystic fibrosis. *Journal of pediatric gastroenterology and nutrition* 2015;60(4):521-6. doi: 10.1097/mpg.0000000000000683 [published Online First: 2014/12/30]

15. Pang T, Leach ST, Katz T, et al. Elevated fecal M2-pyruvate kinase in children with cystic fibrosis: a clue to the increased risk of intestinal malignancy in adulthood? *Journal of gastroenterology and hepatology* 2015;30(5):866-71. doi: 10.1111/jgh.12842 [published Online First: 2014/11/08]
16. Ooi CY, Pang T, Leach ST, et al. Fecal Human beta-Defensin 2 in Children with Cystic Fibrosis: Is There a Diminished Intestinal Innate Immune Response? *Digestive diseases and sciences* 2015;60(10):2946-52. doi: 10.1007/s10620-015-3842-2 [published Online First: 2015/08/15]
17. Lee JM, Leach ST, Katz T, et al. Update of faecal markers of inflammation in children with cystic fibrosis. *Mediators of inflammation* 2012;2012:948367. doi: 10.1155/2012/948367 [published Online First: 2012/09/19]
18. Coffey MJ, Nightingale S, Ooi CY. Predicting a biliary aetiology in paediatric acute pancreatitis. *Archives of disease in childhood* 2013;98(12):965-9. doi: 10.1136/archdischild-2013-304462 [published Online First: 2013/09/10]
19. Coffey MJ, Nightingale S, Ooi CY. Serum lipase as an early predictor of severity in pediatric acute pancreatitis. *Journal of pediatric gastroenterology and nutrition* 2013;56(6):602-8. doi: 10.1097/MPG.0b013e31828b36d8 [published Online First: 2013/02/14]
20. Kaakoush NO, Pickford R, Jaffe A, et al. Is there a role for stool metabolomics in cystic fibrosis? *Pediatrics international : official journal of the Japan Pediatric Society* 2016;58(8):808-11. doi: 10.1111/ped.13063 [published Online First: 2016/08/25]
21. Debyser G, Mesuere B, Clement L, et al. Faecal proteomics: A tool to investigate dysbiosis and inflammation in patients with cystic fibrosis. *Journal of cystic fibrosis : official journal of the European Cystic Fibrosis Society* 2016;15(2):242-50. doi: 10.1016/j.jcf.2015.08.003 [published Online First: 2015/09/04]
22. Kosorok MR, Zeng L, West SE, et al. Acceleration of lung disease in children with cystic fibrosis after *Pseudomonas aeruginosa* acquisition. *Pediatric pulmonology* 2001;32(4):277-87. [published Online First: 2001/09/25]
23. Nixon GM, Davey M. Sleep apnoea in the child. *Australian family physician* 2015;44(6):352-5. [published Online First: 2015/07/27]
24. Moreno-Indias I, Torres M, Montserrat JM, et al. Intermittent hypoxia alters gut microbiota diversity in a mouse model of sleep apnoea. *The European respiratory journal* 2015;45(4):1055-65. doi: 10.1183/09031936.00184314 [published Online First: 2014/12/30]
25. Poroyko VA, Carreras A, Khalyfa A, et al. Chronic Sleep Disruption Alters Gut Microbiota, Induces Systemic and Adipose Tissue Inflammation and Insulin Resistance in Mice. *Scientific reports* 2016;6:35405. doi: 10.1038/srep35405 [published Online First: 2016/10/16]
26. Xue J, Zhou D, Poulsen O, et al. Intermittent Hypoxia and Hypercapnia Accelerate Atherosclerosis, Partially via Trimethylamine-Oxide. *American journal of respiratory cell and molecular biology* 2017;57(5):581-88. doi: 10.1165/rcmb.2017-0086OC [published Online First: 2017/07/06]
27. Tripathi A, Melnik AV, Xue J, et al. Intermittent Hypoxia and Hypercapnia, a Hallmark of Obstructive Sleep Apnea, Alters the Gut Microbiome and Metabolome. *mSystems* 2018;3(3) doi: 10.1128/mSystems.00020-18 [published Online First: 2018/06/14]
28. Durgan DJ, Ganesh BP, Cope JL, et al. Role of the Gut Microbiome in Obstructive Sleep Apnea-Induced Hypertension. *Hypertension (Dallas, Tex : 1979)* 2016;67(2):469-74. doi: 10.1161/hypertensionaha.115.06672 [published Online First: 2015/12/30]

29. Barcelo A, Esquinas C, Robles J, et al. Gut epithelial barrier markers in patients with obstructive sleep apnea. *Sleep medicine* 2016;26:12-15. doi: 10.1016/j.sleep.2016.01.019 [published Online First: 2016/12/23]
30. Wu BG, Sulaiman I, Wang J, et al. Severe Obstructive Sleep Apnea Is Associated with Alterations in the Nasal Microbiome and an Increase in Inflammation. *American journal of respiratory and critical care medicine* 2019;199(1):99-109. doi: 10.1164/rccm.201801-0119OC [published Online First: 2018/07/04]
31. Frykman PK, Nordenskjold A, Kawaguchi A, et al. Characterization of Bacterial and Fungal Microbiome in Children with Hirschsprung Disease with and without a History of Enterocolitis: A Multicenter Study. *PloS one* 2015;10(4):e0124172. doi: 10.1371/journal.pone.0124172 [published Online First: 2015/04/25]
32. Demehri FR, Frykman PK, Cheng Z, et al. Altered fecal short chain fatty acid composition in children with a history of Hirschsprung-associated enterocolitis. *Journal of pediatric surgery* 2016;51(1):81-6. doi: 10.1016/j.jpedsurg.2015.10.012 [published Online First: 2015/11/13]
33. Barr JJ, Auro R, Furlan M, et al. Bacteriophage adhering to mucus provide a non-host-derived immunity. *Proc Natl Acad Sci U S A* 2013;110(26):10771-6. doi: 10.1073/pnas.1305923110 [published Online First: 2013/05/22]
34. Zuo T, Lu XJ, Zhang Y, et al. Gut mucosal virome alterations in ulcerative colitis. *Gut* 2019 doi: 10.1136/gutjnl-2018-318131 [published Online First: 2019/03/08]
35. Minot S, Sinha R, Chen J, et al. The human gut virome: inter-individual variation and dynamic response to diet. *Genome research* 2011;21(10):1616-25. doi: 10.1101/gr.122705.111 [published Online First: 2011/09/02]
36. Rodriguez-Brito B, Li L, Wegley L, et al. Viral and microbial community dynamics in four aquatic environments. *Isme j* 2010;4(6):739-51. doi: 10.1038/ismej.2010.1 [published Online First: 2010/02/12]
37. Kan JM, Cowan CSM, Ooi CY, et al. What can the gut microbiome teach us about the connections between child physical and mental health? A systematic review. *Developmental psychobiology* 2019;61(5):700-13. doi: 10.1002/dev.21819 [published Online First: 2019/01/09]
38. Dinan TG, Cryan JF. The Microbiome-Gut-Brain Axis in Health and Disease. *Gastroenterology clinics of North America* 2017;46(1):77-89. doi: 10.1016/j.gtc.2016.09.007 [published Online First: 2017/02/07]
39. He Y, Wen Q, Yao F, et al. Gut-lung axis: The microbial contributions and clinical implications. *Critical reviews in microbiology* 2017;43(1):81-95. doi: 10.1080/1040841x.2016.1176988 [published Online First: 2016/10/27]
40. Lozupone CA, Hamady M, Kelley ST, et al. Quantitative and qualitative beta diversity measures lead to different insights into factors that structure microbial communities. *Applied and environmental microbiology* 2007;73(5):1576-85. doi: 10.1128/aem.01996-06 [published Online First: 2007/01/16]
41. Anderson JL, Miles C, Tierney AC. Effect of probiotics on respiratory, gastrointestinal and nutritional outcomes in patients with cystic fibrosis: A systematic review. *Journal of cystic fibrosis : official journal of the European Cystic Fibrosis Society* 2017;16(2):186-97. doi: 10.1016/j.jcf.2016.09.004 [published Online First: 2016/10/04]
42. Mandal S, Van Treuren W, White RA, et al. Analysis of composition of microbiomes: a novel method for studying microbial composition. *Microbial ecology in health and disease* 2015;26:27663. doi: 10.3402/mehd.v26.27663 [published Online First: 2015/06/02]

- 1
- 2
- 3
- 4 43. Conceicao-Neto N, Zeller M, Lefrere H, et al. Modular approach to customise sample
- 5 preparation procedures for viral metagenomics: a reproducible protocol for virome
- 6 analysis. *Scientific reports* 2015;5:16532. doi: 10.1038/srep16532 [published Online
- 7 First: 2015/11/13]
- 8 44. Varni JW, Bendo CB, Denham J, et al. PedsQL gastrointestinal symptoms module:
- 9 feasibility, reliability, and validity. *Journal of pediatric gastroenterology and nutrition*
- 10 2014;59(3):347-55. doi: 10.1097/mpg.0000000000000414 [published Online First:
- 11 2014/05/09]
- 12 45. Varni JW, Kay MT, Limbers CA, et al. PedsQL gastrointestinal symptoms module item
- 13 development: qualitative methods. *Journal of pediatric gastroenterology and nutrition*
- 14 2012;54(5):664-71. doi: 10.1097/MPG.0b013e31823c9b88 [published Online First:
- 15 2011/10/20]
- 16 46. Varni JW, Limbers CA, Neighbors K, et al. The PedsQL Infant Scales: feasibility, internal
- 17 consistency reliability, and validity in healthy and ill infants. *Quality of life research :*
- 18 *an international journal of quality of life aspects of treatment, care and rehabilitation*
- 19 2011;20(1):45-55. doi: 10.1007/s11136-010-9730-5 [published Online First:
- 20 2010/08/24]
- 21 47. Benninga MA, Faure C, Hyman PE, et al. Childhood Functional Gastrointestinal Disorders:
- 22 Neonate/Toddler. *Gastroenterology* 2016 doi: 10.1053/j.gastro.2016.02.016 [published
- 23 Online First: 2016/05/05]
- 24 48. Hyams JS, Di Lorenzo C, Saps M, et al. Functional Disorders: Children and Adolescents.
- 25 *Gastroenterology* 2016 doi: 10.1053/j.gastro.2016.02.015 [published Online First:
- 26 2016/05/05]
- 27 49. Nauta MH, Scholing A, Rapee RM, et al. A parent-report measure of children's anxiety:
- 28 psychometric properties and comparison with child-report in a clinic and normal
- 29 sample. *Behaviour research and therapy* 2004;42(7):813-39. doi: 10.1016/s0005-
- 30 7967(03)00200-6 [published Online First: 2004/05/20]
- 31 50. Spence SH. Structure of anxiety symptoms among children: a confirmatory factor-analytic
- 32 study. *Journal of abnormal psychology* 1997;106(2):280-97. [published Online First:
- 33 1997/05/01]
- 34 51. Angold A, Costello, E. J., Messer, S. C., Pickles, A., Winder, F., & Silver, D. The
- 35 development of a short questionnaire for use in epidemiological studies of depression
- 36 in children and adolescents. *International Journal of Methods in Psychiatric Research*
- 37 1995;5:237 - 49.
- 38 52. Messer SC, Angold, A., Costello, E.J., Loeber, R., Van Kammen, W., & Stouthamer-
- 39 Loeber, M. Development of a short questionnaire for use in epidemiological studies of
- 40 depression in children and adolescents: Factor composition and structure across
- 41 development. *International Journal of Methods in Psychiatric Research* 1995;5:251-
- 42 62.
- 43 53. Chan AW, Tetzlaff JM, Altman DG, et al. SPIRIT 2013 statement: defining standard
- 44 protocol items for clinical trials. *Annals of internal medicine* 2013;158(3):200-7. doi:
- 45 10.7326/0003-4819-158-3-201302050-00583 [published Online First: 2013/01/09]
- 46 54. Wheeler R. Gillick or Fraser? A plea for consistency over competence in children. *BMJ*
- 47 *(Clinical research ed)* 2006;332(7545):807. doi: 10.1136/bmj.332.7545.807 [published
- 48 Online First: 2006/04/08]
- 49 55. Whittaker RH. EVOLUTION AND MEASUREMENT OF SPECIES DIVERSITY.
- 50 *TAXON* 1972;21(2-3):213-51. doi: 10.2307/1218190
- 51 56. Shannon CE. A Mathematical Theory of Communication. *Bell System Technical Journal*
- 52 1948;27(3):379-423. doi: 10.1002/j.1538-7305.1948.tb01338.x
- 53
- 54
- 55
- 56
- 57
- 58
- 59
- 60

- 1
- 2
- 3
- 4 57. Bray JR, Curtis JT. An Ordination of the Upland Forest Communities of Southern
- 5 Wisconsin. *Ecological Monographs* 1957;27(4):325-49. doi: 10.2307/1942268
- 6 58. Hubbell SP. The unified neutral theory of biodiversity and biogeography: Princeton
- 7 University Press, Princeton, N.J 2001.
- 8 59. Watson JF, Collins CE, Sibbritt DW, et al. Reproducibility and comparative validity of a
- 9 food frequency questionnaire for Australian children and adolescents. *The international*
- 10 *journal of behavioral nutrition and physical activity* 2009;6:62. doi: 10.1186/1479-
- 11 5868-6-62 [published Online First: 2009/09/12]
- 12 60. Burrows T, Berthon B, Garg ML, et al. A comparative validation of a child food frequency
- 13 questionnaire using red blood cell membrane fatty acids. *European journal of clinical*
- 14 *nutrition* 2012;66(7):825-9. doi: 10.1038/ejcn.2012.26 [published Online First:
- 15 2012/03/02]
- 16 61. Burrows TL, Warren JM, Colyvas K, et al. Validation of overweight children's fruit and
- 17 vegetable intake using plasma carotenoids. *Obesity (Silver Spring, Md)*
- 18 2009;17(1):162-8. doi: 10.1038/oby.2008.495 [published Online First: 2008/11/11]
- 19 62. Collins CE, Burrows TL, Truby H, et al. Comparison of energy intake in toddlers assessed
- 20 by food frequency questionnaire and total energy expenditure measured by the doubly
- 21 labeled water method. *Journal of the Academy of Nutrition and Dietetics*
- 22 2013;113(3):459-63. doi: 10.1016/j.jand.2012.09.021 [published Online First:
- 23 2013/01/16]
- 24 63. Daviss WB, Birmaher B, Melhem NA, et al. Criterion validity of the Mood and Feelings
- 25 Questionnaire for depressive episodes in clinic and non-clinic subjects. *Journal of child*
- 26 *psychology and psychiatry, and allied disciplines* 2006;47(9):927-34. doi:
- 27 10.1111/j.1469-7610.2006.01646.x [published Online First: 2006/08/26]
- 28 64. Chervin RD, Hedger K, Dillon JE, et al. Pediatric sleep questionnaire (PSQ): validity and
- 29 reliability of scales for sleep-disordered breathing, snoring, sleepiness, and behavioral
- 30 problems. *Sleep medicine* 2000;1(1):21-32. [published Online First: 2000/03/25]
- 31 65. Edgar RC. Search and clustering orders of magnitude faster than BLAST. *Bioinformatics*
- 32 *(Oxford, England)* 2010;26(19):2460-61. doi: 10.1093/bioinformatics/btq461
- 33 66. Lin J, Kramna L, Autio R, et al. Vipie: web pipeline for parallel characterization of viral
- 34 populations from multiple NGS samples. *BMC Genomics* 2017;18(1):378. doi:
- 35 10.1186/s12864-017-3721-7 [published Online First: 2017/05/17]
- 36 67. Roux S, Enault F, Hurwitz BL, et al. VirSorter: mining viral signal from microbial genomic
- 37 data. *PeerJ* 2015;3:e985. doi: 10.7717/peerj.985 [published Online First: 2015/06/04]
- 38 68. Cox J, Mann M. MaxQuant enables high peptide identification rates, individualized p.p.b.-
- 39 range mass accuracies and proteome-wide protein quantification. *Nature biotechnology*
- 40 2008;26(12):1367-72. doi: 10.1038/nbt.1511 [published Online First: 2008/11/26]
- 41
- 42
- 43
- 44
- 45
- 46
- 47
- 48
- 49
- 50
- 51
- 52
- 53
- 54
- 55
- 56
- 57
- 58
- 59
- 60

# Reporting checklist for protocol of a clinical trial.

Based on the SPIRIT guidelines.

## Instructions to authors

Complete this checklist by entering the page numbers from your manuscript where readers will find each of the items listed below.

Your article may not currently address all the items on the checklist. Please modify your text to include the missing information. If you are certain that an item does not apply, please write "n/a" and provide a short explanation.

Upload your completed checklist as an extra file when you submit to a journal.

In your methods section, say that you used the SPIRIT reporting guidelines, and cite them as:

Chan A-W, Tetzlaff JM, Altman DG, Laupacis A, Gøtzsche PC, Krleža-Jerić K, Hróbjartsson A, Mann H, Dickersin K, Berlin J, Doré C, Parulekar W, Summerskill W, Groves T, Schulz K, Sox H, Rockhold FW, Rennie D, Moher D. SPIRIT 2013 Statement: Defining standard protocol items for clinical trials. *Ann Intern Med.* 2013;158(3):200-207

|                                             |                     | Reporting Item                                                                                               | Page Number |
|---------------------------------------------|---------------------|--------------------------------------------------------------------------------------------------------------|-------------|
| <b>Administrative information</b>           |                     |                                                                                                              |             |
| Title                                       | <a href="#">#1</a>  | Descriptive title identifying the study design, population, interventions, and, if applicable, trial acronym | 1           |
| Trial registration                          | <a href="#">#2a</a> | Trial identifier and registry name. If not yet registered, name of intended registry                         | 2           |
| Trial registration: data set                | <a href="#">#2b</a> | All items from the World Health Organization Trial Registration Data Set                                     | n/a         |
| Protocol version                            | <a href="#">#3</a>  | Date and version identifier                                                                                  | n/a         |
| Funding                                     | <a href="#">#4</a>  | Sources and types of financial, material, and other support                                                  | 29          |
| Roles and responsibilities: contributorship | <a href="#">#5a</a> | Names, affiliations, and roles of protocol contributors                                                      | 1, 2, 29    |

|    |                           |                     |                                                              |      |
|----|---------------------------|---------------------|--------------------------------------------------------------|------|
| 1  | Roles and                 | <a href="#">#5b</a> | Name and contact information for the trial sponsor           | n/a  |
| 2  | responsibilities:         |                     |                                                              |      |
| 3  | sponsor contact           |                     |                                                              |      |
| 4  | information               |                     |                                                              |      |
| 5  |                           |                     |                                                              |      |
| 6  |                           |                     |                                                              |      |
| 7  | Roles and                 | <a href="#">#5c</a> | Role of study sponsor and funders, if any, in study design;  | n/a  |
| 8  | responsibilities:         |                     | collection, management, analysis, and interpretation of      |      |
| 9  | sponsor and funder        |                     | data; writing of the report; and the decision to submit the  |      |
| 10 |                           |                     | report for publication, including whether they will have     |      |
| 11 |                           |                     | ultimate authority over any of these activities              |      |
| 12 |                           |                     |                                                              |      |
| 13 |                           |                     |                                                              |      |
| 14 |                           |                     |                                                              |      |
| 15 |                           |                     |                                                              |      |
| 16 | Roles and                 | <a href="#">#5d</a> | Composition, roles, and responsibilities of the coordinating | 29   |
| 17 | responsibilities:         |                     | centre, steering committee, endpoint adjudication            |      |
| 18 | committees                |                     | committee, data management team, and other individuals       |      |
| 19 |                           |                     | or groups overseeing the trial, if applicable (see Item 21a  |      |
| 20 |                           |                     | for data monitoring committee)                               |      |
| 21 |                           |                     |                                                              |      |
| 22 |                           |                     |                                                              |      |
| 23 |                           |                     |                                                              |      |
| 24 | <b>Introduction</b>       |                     |                                                              |      |
| 25 |                           |                     |                                                              |      |
| 26 | Background and            | <a href="#">#6a</a> | Description of research question and justification for       | 6-9  |
| 27 | rationale                 |                     | undertaking the trial, including summary of relevant         |      |
| 28 |                           |                     | studies (published and unpublished) examining benefits       |      |
| 29 |                           |                     | and harms for each intervention                              |      |
| 30 |                           |                     |                                                              |      |
| 31 |                           |                     |                                                              |      |
| 32 |                           |                     |                                                              |      |
| 33 | Background and            | <a href="#">#6b</a> | Explanation for choice of comparators                        | 6-9  |
| 34 | rationale: choice of      |                     |                                                              |      |
| 35 | comparators               |                     |                                                              |      |
| 36 |                           |                     |                                                              |      |
| 37 |                           |                     |                                                              |      |
| 38 | Objectives                | <a href="#">#7</a>  | Specific objectives or hypotheses                            | 9-12 |
| 39 |                           |                     |                                                              |      |
| 40 |                           |                     |                                                              |      |
| 41 | Trial design              | <a href="#">#8</a>  | Description of trial design including type of trial (eg,     | 13   |
| 42 |                           |                     | parallel group, crossover, factorial, single group),         |      |
| 43 |                           |                     | allocation ratio, and framework (eg, superiority,            |      |
| 44 |                           |                     | equivalence, non-inferiority, exploratory)                   |      |
| 45 |                           |                     |                                                              |      |
| 46 |                           |                     |                                                              |      |
| 47 |                           |                     |                                                              |      |
| 48 | <b>Methods:</b>           |                     |                                                              |      |
| 49 | <b>Participants,</b>      |                     |                                                              |      |
| 50 | <b>interventions, and</b> |                     |                                                              |      |
| 51 | <b>outcomes</b>           |                     |                                                              |      |
| 52 |                           |                     |                                                              |      |
| 53 |                           |                     |                                                              |      |
| 54 | Study setting             | <a href="#">#9</a>  | Description of study settings (eg, community clinic,         | 13   |
| 55 |                           |                     | academic hospital) and list of countries where data will be  |      |
| 56 |                           |                     | collected. Reference to where list of study sites can be     |      |
| 57 |                           |                     |                                                              |      |
| 58 |                           |                     |                                                              |      |
| 59 |                           |                     |                                                              |      |
| 60 |                           |                     |                                                              |      |



obtained

|    |                                 |                      |                                                                                                                                                                                                                                                                                                                                                                                |
|----|---------------------------------|----------------------|--------------------------------------------------------------------------------------------------------------------------------------------------------------------------------------------------------------------------------------------------------------------------------------------------------------------------------------------------------------------------------|
| 1  |                                 |                      |                                                                                                                                                                                                                                                                                                                                                                                |
| 2  |                                 |                      |                                                                                                                                                                                                                                                                                                                                                                                |
| 3  | Eligibility criteria            | <a href="#">#10</a>  | Inclusion and exclusion criteria for participants. If applicable, eligibility criteria for study centres and individuals who will perform the interventions (eg, surgeons, psychotherapists)                                                                                                                                                                                   |
| 4  |                                 |                      |                                                                                                                                                                                                                                                                                                                                                                                |
| 5  |                                 |                      |                                                                                                                                                                                                                                                                                                                                                                                |
| 6  |                                 |                      |                                                                                                                                                                                                                                                                                                                                                                                |
| 7  |                                 |                      |                                                                                                                                                                                                                                                                                                                                                                                |
| 8  |                                 |                      |                                                                                                                                                                                                                                                                                                                                                                                |
| 9  | Interventions: description      | <a href="#">#11a</a> | Interventions for each group with sufficient detail to allow replication, including how and when they will be administered                                                                                                                                                                                                                                                     |
| 10 |                                 |                      |                                                                                                                                                                                                                                                                                                                                                                                |
| 11 |                                 |                      |                                                                                                                                                                                                                                                                                                                                                                                |
| 12 |                                 |                      |                                                                                                                                                                                                                                                                                                                                                                                |
| 13 |                                 |                      |                                                                                                                                                                                                                                                                                                                                                                                |
| 14 | Interventions: modifications    | <a href="#">#11b</a> | Criteria for discontinuing or modifying allocated interventions for a given trial participant (eg, drug dose change in response to harms, participant request, or improving / worsening disease)                                                                                                                                                                               |
| 15 |                                 |                      |                                                                                                                                                                                                                                                                                                                                                                                |
| 16 |                                 |                      |                                                                                                                                                                                                                                                                                                                                                                                |
| 17 |                                 |                      |                                                                                                                                                                                                                                                                                                                                                                                |
| 18 |                                 |                      |                                                                                                                                                                                                                                                                                                                                                                                |
| 19 |                                 |                      |                                                                                                                                                                                                                                                                                                                                                                                |
| 20 |                                 |                      |                                                                                                                                                                                                                                                                                                                                                                                |
| 21 | Interventions: adherence        | <a href="#">#11c</a> | Strategies to improve adherence to intervention protocols, and any procedures for monitoring adherence (eg, drug tablet return; laboratory tests)                                                                                                                                                                                                                              |
| 22 |                                 |                      |                                                                                                                                                                                                                                                                                                                                                                                |
| 23 |                                 |                      |                                                                                                                                                                                                                                                                                                                                                                                |
| 24 |                                 |                      |                                                                                                                                                                                                                                                                                                                                                                                |
| 25 |                                 |                      |                                                                                                                                                                                                                                                                                                                                                                                |
| 26 |                                 |                      |                                                                                                                                                                                                                                                                                                                                                                                |
| 27 | Interventions: concomitant care | <a href="#">#11d</a> | Relevant concomitant care and interventions that are permitted or prohibited during the trial                                                                                                                                                                                                                                                                                  |
| 28 |                                 |                      |                                                                                                                                                                                                                                                                                                                                                                                |
| 29 |                                 |                      |                                                                                                                                                                                                                                                                                                                                                                                |
| 30 |                                 |                      |                                                                                                                                                                                                                                                                                                                                                                                |
| 31 | Outcomes                        | <a href="#">#12</a>  | Primary, secondary, and other outcomes, including the specific measurement variable (eg, systolic blood pressure), analysis metric (eg, change from baseline, final value, time to event), method of aggregation (eg, median, proportion), and time point for each outcome. Explanation of the clinical relevance of chosen efficacy and harm outcomes is strongly recommended |
| 32 |                                 |                      |                                                                                                                                                                                                                                                                                                                                                                                |
| 33 |                                 |                      |                                                                                                                                                                                                                                                                                                                                                                                |
| 34 |                                 |                      |                                                                                                                                                                                                                                                                                                                                                                                |
| 35 |                                 |                      |                                                                                                                                                                                                                                                                                                                                                                                |
| 36 |                                 |                      |                                                                                                                                                                                                                                                                                                                                                                                |
| 37 |                                 |                      |                                                                                                                                                                                                                                                                                                                                                                                |
| 38 |                                 |                      |                                                                                                                                                                                                                                                                                                                                                                                |
| 39 |                                 |                      |                                                                                                                                                                                                                                                                                                                                                                                |
| 40 |                                 |                      |                                                                                                                                                                                                                                                                                                                                                                                |
| 41 |                                 |                      |                                                                                                                                                                                                                                                                                                                                                                                |
| 42 | Participant timeline            | <a href="#">#13</a>  | Time schedule of enrolment, interventions (including any run-ins and washouts), assessments, and visits for participants. A schematic diagram is highly recommended (see Figure)                                                                                                                                                                                               |
| 43 |                                 |                      |                                                                                                                                                                                                                                                                                                                                                                                |
| 44 |                                 |                      |                                                                                                                                                                                                                                                                                                                                                                                |
| 45 |                                 |                      |                                                                                                                                                                                                                                                                                                                                                                                |
| 46 |                                 |                      |                                                                                                                                                                                                                                                                                                                                                                                |
| 47 |                                 |                      |                                                                                                                                                                                                                                                                                                                                                                                |
| 48 |                                 |                      |                                                                                                                                                                                                                                                                                                                                                                                |
| 49 | Sample size                     | <a href="#">#14</a>  | Estimated number of participants needed to achieve study objectives and how it was determined, including clinical and statistical assumptions supporting any sample size calculations                                                                                                                                                                                          |
| 50 |                                 |                      |                                                                                                                                                                                                                                                                                                                                                                                |
| 51 |                                 |                      |                                                                                                                                                                                                                                                                                                                                                                                |
| 52 |                                 |                      |                                                                                                                                                                                                                                                                                                                                                                                |
| 53 |                                 |                      |                                                                                                                                                                                                                                                                                                                                                                                |
| 54 |                                 |                      |                                                                                                                                                                                                                                                                                                                                                                                |
| 55 | Recruitment                     | <a href="#">#15</a>  | Strategies for achieving adequate participant enrolment to reach target sample size                                                                                                                                                                                                                                                                                            |
| 56 |                                 |                      |                                                                                                                                                                                                                                                                                                                                                                                |
| 57 |                                 |                      |                                                                                                                                                                                                                                                                                                                                                                                |
| 58 |                                 |                      |                                                                                                                                                                                                                                                                                                                                                                                |
| 59 |                                 |                      |                                                                                                                                                                                                                                                                                                                                                                                |
| 60 |                                 |                      |                                                                                                                                                                                                                                                                                                                                                                                |

1 **Methods:**

2 **Assignment of**  
3 **interventions (for**  
4 **controlled trials)**  
5  
6

|    |                      |                      |                                                                |
|----|----------------------|----------------------|----------------------------------------------------------------|
| 7  |                      |                      |                                                                |
| 8  | Allocation: sequence | <a href="#">#16a</a> | Method of generating the allocation sequence (eg, n/a          |
| 9  | generation           |                      | computer-generated random numbers), and list of any            |
| 10 |                      |                      | factors for stratification. To reduce predictability of a      |
| 11 |                      |                      | random sequence, details of any planned restriction (eg,       |
| 12 |                      |                      | blocking) should be provided in a separate document that       |
| 13 |                      |                      | is unavailable to those who enrol participants or assign       |
| 14 |                      |                      | interventions                                                  |
| 15 |                      |                      |                                                                |
| 16 |                      |                      |                                                                |
| 17 |                      |                      |                                                                |
| 18 |                      |                      |                                                                |
| 19 | Allocation           | <a href="#">#16b</a> | Mechanism of implementing the allocation sequence (eg, n/a     |
| 20 | concealment          |                      | central telephone; sequentially numbered, opaque, sealed       |
| 21 | mechanism            |                      | envelopes), describing any steps to conceal the sequence       |
| 22 |                      |                      | until interventions are assigned                               |
| 23 |                      |                      |                                                                |
| 24 |                      |                      |                                                                |
| 25 |                      |                      |                                                                |
| 26 | Allocation:          | <a href="#">#16c</a> | Who will generate the allocation sequence, who will enrol n/a  |
| 27 | implementation       |                      | participants, and who will assign participants to              |
| 28 |                      |                      | interventions                                                  |
| 29 |                      |                      |                                                                |
| 30 |                      |                      |                                                                |
| 31 | Blinding (masking)   | <a href="#">#17a</a> | Who will be blinded after assignment to interventions (eg, n/a |
| 32 |                      |                      | trial participants, care providers, outcome assessors, data    |
| 33 |                      |                      | analysts), and how                                             |
| 34 |                      |                      |                                                                |
| 35 |                      |                      |                                                                |
| 36 | Blinding (masking):  | <a href="#">#17b</a> | If blinded, circumstances under which unblinding is n/a        |
| 37 | emergency unblinding |                      | permissible, and procedure for revealing a participant's       |
| 38 |                      |                      | allocated intervention during the trial                        |
| 39 |                      |                      |                                                                |
| 40 |                      |                      |                                                                |

41 **Methods: Data**  
42 **collection,**  
43 **management, and**  
44 **analysis**  
45  
46  
47

|    |                      |                      |                                                                 |
|----|----------------------|----------------------|-----------------------------------------------------------------|
| 48 |                      |                      |                                                                 |
| 49 | Data collection plan | <a href="#">#18a</a> | Plans for assessment and collection of outcome, baseline, 18-24 |
| 50 |                      |                      | and other trial data, including any related processes to        |
| 51 |                      |                      | promote data quality (eg, duplicate measurements,               |
| 52 |                      |                      | training of assessors) and a description of study               |
| 53 |                      |                      | instruments (eg, questionnaires, laboratory tests) along        |
| 54 |                      |                      | with their reliability and validity, if known. Reference to     |
| 55 |                      |                      | where data collection forms can be found, if not in the         |
| 56 |                      |                      |                                                                 |
| 57 |                      |                      |                                                                 |
| 58 |                      |                      |                                                                 |
| 59 |                      |                      |                                                                 |

protocol

|    |                            |                      |                                                                |
|----|----------------------------|----------------------|----------------------------------------------------------------|
| 1  |                            |                      |                                                                |
| 2  |                            |                      |                                                                |
| 3  | Data collection plan:      | <a href="#">#18b</a> | Plans to promote participant retention and complete            |
| 4  | retention                  |                      | follow-up, including list of any outcome data to be            |
| 5  |                            |                      | collected for participants who discontinue or deviate from     |
| 6  |                            |                      | intervention protocols                                         |
| 7  |                            |                      |                                                                |
| 8  |                            |                      |                                                                |
| 9  | Data management            | <a href="#">#19</a>  | Plans for data entry, coding, security, and storage,           |
| 10 |                            |                      | including any related processes to promote data quality        |
| 11 |                            |                      | (eg, double data entry; range checks for data values).         |
| 12 |                            |                      | Reference to where details of data management                  |
| 13 |                            |                      | procedures can be found, if not in the protocol                |
| 14 |                            |                      |                                                                |
| 15 |                            |                      |                                                                |
| 16 |                            |                      |                                                                |
| 17 |                            |                      |                                                                |
| 18 | Statistics: outcomes       | <a href="#">#20a</a> | Statistical methods for analysing primary and secondary        |
| 19 |                            |                      | outcomes. Reference to where other details of the              |
| 20 |                            |                      | statistical analysis plan can be found, if not in the protocol |
| 21 |                            |                      |                                                                |
| 22 |                            |                      |                                                                |
| 23 | Statistics: additional     | <a href="#">#20b</a> | Methods for any additional analyses (eg, subgroup and          |
| 24 | analyses                   |                      | adjusted analyses)                                             |
| 25 |                            |                      |                                                                |
| 26 |                            |                      |                                                                |
| 27 | Statistics: analysis       | <a href="#">#20c</a> | Definition of analysis population relating to protocol non-    |
| 28 | population and             |                      | adherence (eg, as randomised analysis), and any                |
| 29 | missing data               |                      | statistical methods to handle missing data (eg, multiple       |
| 30 |                            |                      | imputation)                                                    |
| 31 |                            |                      |                                                                |
| 32 |                            |                      |                                                                |
| 33 | <b>Methods: Monitoring</b> |                      |                                                                |
| 34 |                            |                      |                                                                |
| 35 |                            |                      |                                                                |
| 36 | Data monitoring:           | <a href="#">#21a</a> | Composition of data monitoring committee (DMC);                |
| 37 | formal committee           |                      | summary of its role and reporting structure; statement of      |
| 38 |                            |                      | whether it is independent from the sponsor and competing       |
| 39 |                            |                      | interests; and reference to where further details about its    |
| 40 |                            |                      | charter can be found, if not in the protocol. Alternatively,   |
| 41 |                            |                      | an explanation of why a DMC is not needed                      |
| 42 |                            |                      |                                                                |
| 43 |                            |                      |                                                                |
| 44 |                            |                      |                                                                |
| 45 |                            |                      |                                                                |
| 46 | Data monitoring:           | <a href="#">#21b</a> | Description of any interim analyses and stopping               |
| 47 | interim analysis           |                      | guidelines, including who will have access to these interim    |
| 48 |                            |                      | results and make the final decision to terminate the trial     |
| 49 |                            |                      |                                                                |
| 50 |                            |                      |                                                                |
| 51 | Harms                      | <a href="#">#22</a>  | Plans for collecting, assessing, reporting, and managing       |
| 52 |                            |                      | solicited and spontaneously reported adverse events and        |
| 53 |                            |                      | other unintended effects of trial interventions or trial       |
| 54 |                            |                      | conduct                                                        |
| 55 |                            |                      |                                                                |
| 56 |                            |                      |                                                                |
| 57 |                            |                      |                                                                |
| 58 | Auditing                   | <a href="#">#23</a>  | Frequency and procedures for auditing trial conduct, if        |
| 59 |                            |                      | n/a                                                            |
| 60 |                            |                      |                                                                |

any, and whether the process will be independent from investigators and the sponsor

## Ethics and dissemination

|                                      |                      |                                                                                                                                                                                                                                                                                     |       |
|--------------------------------------|----------------------|-------------------------------------------------------------------------------------------------------------------------------------------------------------------------------------------------------------------------------------------------------------------------------------|-------|
| Research ethics approval             | <a href="#">#24</a>  | Plans for seeking research ethics committee / institutional review board (REC / IRB) approval                                                                                                                                                                                       | 27    |
| Protocol amendments                  | <a href="#">#25</a>  | Plans for communicating important protocol modifications (eg, changes to eligibility criteria, outcomes, analyses) to relevant parties (eg, investigators, REC / IRBs, trial participants, trial registries, journals, regulators)                                                  | 27    |
| Consent or assent                    | <a href="#">#26a</a> | Who will obtain informed consent or assent from potential trial participants or authorised surrogates, and how (see Item 32)                                                                                                                                                        | 13-14 |
| Consent or assent: ancillary studies | <a href="#">#26b</a> | Additional consent provisions for collection and use of participant data and biological specimens in ancillary studies, if applicable                                                                                                                                               | 13-14 |
| Confidentiality                      | <a href="#">#27</a>  | How personal information about potential and enrolled participants will be collected, shared, and maintained in order to protect confidentiality before, during, and after the trial                                                                                                | 24    |
| Declaration of interests             | <a href="#">#28</a>  | Financial and other competing interests for principal investigators for the overall trial and each study site                                                                                                                                                                       | 29    |
| Data access                          | <a href="#">#29</a>  | Statement of who will have access to the final trial dataset, and disclosure of contractual agreements that limit such access for investigators                                                                                                                                     | 29    |
| Ancillary and post trial care        | <a href="#">#30</a>  | Provisions, if any, for ancillary and post-trial care, and for compensation to those who suffer harm from trial participation                                                                                                                                                       | 24-25 |
| Dissemination policy: trial results  | <a href="#">#31a</a> | Plans for investigators and sponsor to communicate trial results to participants, healthcare professionals, the public, and other relevant groups (eg, via publication, reporting in results databases, or other data sharing arrangements), including any publication restrictions | 27    |
| Dissemination policy:                | <a href="#">#31b</a> | Authorship eligibility guidelines and any intended use of                                                                                                                                                                                                                           | 28    |

|   |                       |                      |                                                                    |
|---|-----------------------|----------------------|--------------------------------------------------------------------|
| 1 | authorship            | professional writers |                                                                    |
| 2 | Dissemination policy: | <a href="#">#31c</a> | Plans, if any, for granting public access to the full protocol, 29 |
| 3 | reproducible research |                      | participant-level dataset, and statistical code                    |
| 4 |                       |                      |                                                                    |
| 5 |                       |                      |                                                                    |

## 6 Appendices

|    |                      |                     |                                                               |     |
|----|----------------------|---------------------|---------------------------------------------------------------|-----|
| 8  | Informed consent     | <a href="#">#32</a> | Model consent form and other related documentation            | n/a |
| 9  | materials            |                     | given to participants and authorised surrogates               |     |
| 10 |                      |                     |                                                               |     |
| 11 |                      |                     |                                                               |     |
| 12 | Biological specimens | <a href="#">#33</a> | Plans for collection, laboratory evaluation, and storage of   | 24  |
| 13 |                      |                     | biological specimens for genetic or molecular analysis in     |     |
| 14 |                      |                     | the current trial and for future use in ancillary studies, if |     |
| 15 |                      |                     | applicable                                                    |     |
| 16 |                      |                     |                                                               |     |
| 17 |                      |                     |                                                               |     |
| 18 |                      |                     |                                                               |     |

19 None The SPIRIT checklist is distributed under the terms of the Creative Commons Attribution  
 20 License CC-BY-ND 3.0. This checklist can be completed online using <https://www.goodreports.org/>, a  
 21 tool made by the [EQUATOR Network](#) in collaboration with [Penelope.ai](#)  
 22  
 23  
 24  
 25  
 26  
 27  
 28  
 29  
 30  
 31  
 32  
 33  
 34  
 35  
 36  
 37  
 38  
 39  
 40  
 41  
 42  
 43  
 44  
 45  
 46  
 47  
 48  
 49  
 50  
 51  
 52  
 53  
 54  
 55  
 56  
 57  
 58  
 59  
 60

# BMJ Open

## Evaluating the Alimentary and Respiratory Tracts in Health and disease (EARTH) research program: a protocol for prospective, longitudinal, controlled, observational studies in children with chronic disease at an Australian tertiary paediatric hospital.

|                               |                                                                                                                                                                                                                                                                                                                                                                                                                                                                                                                                                                                                                                                                                                                                                                                                                                                                                                                                                                                                                                                                                                                                                                                                                                                                                                                                                                                                                                                                                                                                                                                                                                                                                                                                                                                                                                                                                                                                                                                                                                                                                                                                                                                                                                                                      |
|-------------------------------|----------------------------------------------------------------------------------------------------------------------------------------------------------------------------------------------------------------------------------------------------------------------------------------------------------------------------------------------------------------------------------------------------------------------------------------------------------------------------------------------------------------------------------------------------------------------------------------------------------------------------------------------------------------------------------------------------------------------------------------------------------------------------------------------------------------------------------------------------------------------------------------------------------------------------------------------------------------------------------------------------------------------------------------------------------------------------------------------------------------------------------------------------------------------------------------------------------------------------------------------------------------------------------------------------------------------------------------------------------------------------------------------------------------------------------------------------------------------------------------------------------------------------------------------------------------------------------------------------------------------------------------------------------------------------------------------------------------------------------------------------------------------------------------------------------------------------------------------------------------------------------------------------------------------------------------------------------------------------------------------------------------------------------------------------------------------------------------------------------------------------------------------------------------------------------------------------------------------------------------------------------------------|
| Journal:                      | <i>BMJ Open</i>                                                                                                                                                                                                                                                                                                                                                                                                                                                                                                                                                                                                                                                                                                                                                                                                                                                                                                                                                                                                                                                                                                                                                                                                                                                                                                                                                                                                                                                                                                                                                                                                                                                                                                                                                                                                                                                                                                                                                                                                                                                                                                                                                                                                                                                      |
| Manuscript ID                 | bmjopen-2019-033916.R1                                                                                                                                                                                                                                                                                                                                                                                                                                                                                                                                                                                                                                                                                                                                                                                                                                                                                                                                                                                                                                                                                                                                                                                                                                                                                                                                                                                                                                                                                                                                                                                                                                                                                                                                                                                                                                                                                                                                                                                                                                                                                                                                                                                                                                               |
| Article Type:                 | Protocol                                                                                                                                                                                                                                                                                                                                                                                                                                                                                                                                                                                                                                                                                                                                                                                                                                                                                                                                                                                                                                                                                                                                                                                                                                                                                                                                                                                                                                                                                                                                                                                                                                                                                                                                                                                                                                                                                                                                                                                                                                                                                                                                                                                                                                                             |
| Date Submitted by the Author: | 08-Dec-2019                                                                                                                                                                                                                                                                                                                                                                                                                                                                                                                                                                                                                                                                                                                                                                                                                                                                                                                                                                                                                                                                                                                                                                                                                                                                                                                                                                                                                                                                                                                                                                                                                                                                                                                                                                                                                                                                                                                                                                                                                                                                                                                                                                                                                                                          |
| Complete List of Authors:     | <p>Coffey, Michael; University of New South Wales, Discipline of Paediatrics, School of Women's and Children's Health, Faculty of Medicine</p> <p>McKay, Isabelle; University of New South Wales, Discipline of Paediatrics, School of Women's and Children's Health, Faculty of Medicine</p> <p>Doumit, Michael; Sydney Children's Hospital Randwick, Department of Physiotherapy</p> <p>Chuang, Sandra; University of New South Wales, Discipline of Paediatrics, School of Women's and Children's Health, Faculty of Medicine; Sydney Children's Hospital Randwick, Department of Respiratory</p> <p>Adams, Susan; Sydney Children's Hospital Randwick &amp; Neuroscience Research Australia (NeuRA), Department of Surgery; University of New South Wales, Discipline of Paediatrics, School of Women's and Children's Health &amp; School of Medical Sciences, Faculty of Medicine</p> <p>Stelzer-Braid, Sacha; University of New South Wales, School of Medical Sciences; Prince of Wales Hospital, Virology Research Laboratory</p> <p>Waters, Shafagh A; University of New South Wales, Discipline of Paediatrics, School of Women's and Children's Health, Faculty of Medicine; Molecular and Integrative Cystic Fibrosis (miCF) Research Centre</p> <p>Kasparian, N; University of New South Wales, Discipline of Paediatrics, School of Women's and Children's Health, Faculty of Medicine; Harvard Medical School</p> <p>Thomas, Torsten; University of New South Wales, Centre for Marine Science and Innovation, School of Biological, Earth and Environmental Sciences</p> <p>Jaffe, Adam; University of New South Wales, Discipline of Paediatrics, School of Women's and Children's Health, Faculty of Medicine; Sydney Children's Hospital Randwick, Molecular and Integrative Cystic Fibrosis (miCF) Research Centre &amp; Department of Respiratory</p> <p>Katz, Tamarah; Sydney Children's Hospital Randwick, Department of Nutrition and Dietetics</p> <p>Ooi, Chee Y.; University of New South Wales, Discipline of Paediatrics, School of Women's and Children's Health, Faculty of Medicine; Sydney Children's Hospital Randwick, Molecular and Integrative Cystic Fibrosis (miCF) Research Centre &amp; Department of Gastroenterology</p> |

1  
2  
3  
4  
5  
6  
7  
8  
9  
10  
11  
12  
13  
14  
15  
16  
17  
18  
19  
20  
21  
22  
23  
24  
25  
26  
27  
28  
29  
30  
31  
32  
33  
34  
35  
36  
37  
38  
39  
40  
41  
42  
43  
44  
45  
46  
47  
48  
49  
50  
51  
52  
53  
54  
55  
56  
57  
58  
59  
60

|                                   |                                                                                                    |
|-----------------------------------|----------------------------------------------------------------------------------------------------|
| <b>Primary Subject Heading:</b>   | Paediatrics                                                                                        |
| <b>Secondary Subject Heading:</b> | Gastroenterology and hepatology, Respiratory medicine, Research methods                            |
| <b>Keywords:</b>                  | PAEDIATRICS, GASTROENTEROLOGY, RESPIRATORY MEDICINE (see Thoracic Medicine), NUTRITION & DIETETICS |
|                                   |                                                                                                    |

SCHOLARONE™  
Manuscripts



I, the Submitting Author has the right to grant and does grant on behalf of all authors of the Work (as defined in the below author licence), an exclusive licence and/or a non-exclusive licence for contributions from authors who are: i) UK Crown employees; ii) where BMJ has agreed a CC-BY licence shall apply, and/or iii) in accordance with the terms applicable for US Federal Government officers or employees acting as part of their official duties; on a worldwide, perpetual, irrevocable, royalty-free basis to BMJ Publishing Group Ltd ("BMJ") its licensees and where the relevant Journal is co-owned by BMJ to the co-owners of the Journal, to publish the Work in this journal and any other BMJ products and to exploit all rights, as set out in our [licence](#).

The Submitting Author accepts and understands that any supply made under these terms is made by BMJ to the Submitting Author unless you are acting as an employee on behalf of your employer or a postgraduate student of an affiliated institution which is paying any applicable article publishing charge ("APC") for Open Access articles. Where the Submitting Author wishes to make the Work available on an Open Access basis (and intends to pay the relevant APC), the terms of reuse of such Open Access shall be governed by a Creative Commons licence – details of these licences and which [Creative Commons](#) licence will apply to this Work are set out in our licence referred to above.

Other than as permitted in any relevant BMJ Author's Self Archiving Policies, I confirm this Work has not been accepted for publication elsewhere, is not being considered for publication elsewhere and does not duplicate material already published. I confirm all authors consent to publication of this Work and authorise the granting of this licence.



1  
2  
3 **Evaluating the Alimentary and Respiratory Tracts in Health and disease**  
4  
5  
6 **(EARTH) research program: a protocol for prospective, longitudinal, controlled,**  
7  
8  
9 **observational studies in children with chronic disease at an Australian tertiary**  
10  
11 **paediatric hospital.**  
12  
13  
14  
15

16 **Authors:**

17  
18 Michael J Coffey,<sup>1</sup> Isabelle R McKay,<sup>1</sup> Michael Doumit,<sup>2</sup> Sandra Chuang,<sup>1,3</sup> Susan  
19 Adams,<sup>1,4,5,6</sup> Sacha Stelzer-Braid,<sup>5,7</sup> Shafagh Waters,<sup>1,8</sup> Nadine A. Kasparian,<sup>1,9</sup> Torsten  
20 Thomas,<sup>10</sup> Adam Jaffe,<sup>1,3,8</sup> Tamarah Katz,<sup>11</sup> Chee Y Ooi.<sup>1,7,12,\*</sup>  
21  
22  
23  
24  
25  
26

27 <sup>1</sup>Discipline of Paediatrics, School of Women's and Children's Health, University of New South  
28 Wales, Sydney, NSW, Australia.  
29

30 <sup>2</sup>Department of Physiotherapy, Sydney Children's Hospital Randwick, Sydney, Australia.  
31

32 <sup>3</sup>Department of Respiratory, Sydney Children's Hospital, High Street, Randwick NSW,  
33 Australia.  
34  
35  
36

37 <sup>4</sup>Department of Surgery, Sydney Children's Hospital Randwick, Sydney, Australia.  
38

39 <sup>5</sup>School of Medical Sciences, University of New South Wales, Sydney, NSW, Australia.  
40

41 <sup>6</sup>Neuroscience Research Australia (NeuRA), Sydney, NSW, Australia.  
42

43 <sup>7</sup>Virology Research Laboratory, Prince of Wales Hospital, Sydney, NSW, Australia.  
44

45 <sup>8</sup>Molecular and Integrative Cystic Fibrosis (miCF) Research Centre, High Street, Randwick  
46 NSW, Australia.  
47

48 <sup>9</sup>Harvard Medical School, Boston, Massachusetts, United States.  
49

50 <sup>10</sup>Centre for Marine Science and Innovation, School of Biological, Earth and Environmental  
51 Sciences, University of New South Wales, Sydney NSW, Australia.  
52  
53

54 <sup>11</sup>Department of Nutrition and Dietetics, Sydney Children's Hospital, Sydney, Australia.  
55  
56  
57  
58  
59  
60

1  
2  
3 <sup>12</sup>Department of Gastroenterology, Sydney Children's Hospital, High Street, Randwick NSW,  
4  
5 Australia.

6  
7  
8 \*Correspondence to Associate Professor Chee Y. (Keith) Ooi; [keith.ooi@unsw.edu.au](mailto:keith.ooi@unsw.edu.au)  
9

10  
11  
12 **Keywords**

13  
14 Child; Chronic Disease; Diet Surveys; Microbiome, Human; Quality of Life.  
15  
16

17  
18  
19 **Word Count**

20  
21 3,747  
22  
23

24  
25  
26 **Study Start Date:** April 18, 2018  
27

28 **Estimated Study End Date:** March 23, 2023  
29  
30  
31  
32  
33  
34  
35  
36  
37  
38  
39  
40  
41  
42  
43  
44  
45  
46  
47  
48  
49  
50  
51  
52  
53  
54  
55  
56  
57  
58  
59  
60

## ABSTRACT

### Introduction

Chronic gastrointestinal and respiratory conditions of childhood can have long-lasting physical, psychosocial, and economic effects on children and their families. Alterations in diet and intestinal and respiratory microbiomes may have important implications for physical and psychosocial health. Diet influences the intestinal microbiome and should be considered when exploring disease-specific alterations. The concepts of gut-brain and gut-lung axes provide novel perspectives for examining chronic childhood disease(s). We established the “Evaluating the Alimentary and Respiratory Tracts in Health and disease” (EARTH) research program to provide a structured, holistic evaluation of children with chronic gastrointestinal and/or respiratory conditions.

### Methods and analysis

The EARTH program provides a framework for a series of prospective, longitudinal, controlled, observational studies (comprised of individual sub-studies), conducted at an Australian tertiary paediatric hospital (the methodology is applicable to other settings). Children with a chronic gastrointestinal and/or respiratory condition will be compared to age and gender matched healthy controls (HC) across a 12-month period. The following will be collected at baseline, 6 and 12 months: (i) stool, (ii) oropharyngeal swab or sputum, (iii) semi-quantitative food frequency questionnaire, (iv) details of disease symptomatology, (v) health-related quality of life, and (vi) psychosocial factors. Data on the intestinal and respiratory microbiomes and diet will be compared between children with a condition and HC. Correlations between dietary intake (energy, macro- and micro-nutrients), intestinal and respiratory microbiomes within each group will be explored. Data on disease symptomatology,

1  
2  
3 quality of life and psychosocial factors will also be compared between children with a condition  
4  
5 and HC.  
6

7  
8 Results will be hypothesis-generating and used to direct future focused studies. There is future  
9  
10 potential for direct translation into clinical care, as diet is a highly modifiable factor.  
11  
12  
13

### 14 15 **Ethics and dissemination**

16  
17 Ethics approval: HREC/18/SCHN/26. Study results will be presented at international  
18  
19 conferences and published in peer-reviewed journals.  
20  
21  
22

### 23 24 **Trial registration**

25  
26 NCT04071314  
27  
28  
29  
30  
31  
32

## 33 34 **ARTICLE SUMMARY**

### 35 36 **Strengths and limitations of this study**

- 37  
38
- 39 • The prospective, longitudinal, controlled, observational design of this research program  
40 provides a structured approach which can be simultaneously applied to multiple chronic  
41 gastrointestinal and/or respiratory conditions of childhood and utilises a universal  
42 control cohort (for age and gender matching).  
43  
44
  - 45 • This study will simultaneously evaluate dietary intake and the intestinal and respiratory  
46 microbiomes, which will tease out disease-causing alterations in the microbiomes,  
47 provide insights into the gut-lung axis and potentially identify modifiable dietary  
48 factors.  
49  
50
  - 51 • We will explore relationships between the primary outcomes (diet, intestinal and  
52 respiratory microbiomes) and health-related quality of life (including  
53  
54  
55  
56  
57  
58  
59  
60

1  
2  
3                   symptomatology), which may provide insights into the gut-brain axis and identify novel  
4  
5                   pathogenic mechanisms in these conditions.  
6  
7

- 8                   • A limitation of this research program is that it currently includes a single centre, Sydney  
9                   Children's Hospital Randwick, Australia, however it is a tertiary referral centre for a  
10                  diverse group of children across the state of New South Wales, Australia.  
11  
12                  • A further limitation is the arbitrary sample size targets given the exploratory nature of  
13                  these studies.  
14  
15  
16  
17  
18  
19  
20  
21  
22  
23  
24  
25  
26  
27  
28  
29  
30  
31  
32  
33  
34  
35  
36  
37  
38  
39  
40  
41  
42  
43  
44  
45  
46  
47  
48  
49  
50  
51  
52  
53  
54  
55  
56  
57  
58  
59  
60

For peer review only

## INTRODUCTION

The primary disease burden in childhood has shifted over the last century from infectious to chronic diseases.<sup>1</sup> Chronic childhood diseases, encompassing a wide spectrum of conditions with different pathogeneses, may have long-lasting physical, psychosocial, and economic effects on children and their families.<sup>2 3</sup> The human microbiome is a collection of all microorganisms (bacteria, viruses, archaea and eukaryotes) living in association with the human body.<sup>4</sup> Our understanding of the human microbiomes in health and disease has begun to develop due to the advent of high-throughput sequencing and mass-spectrometry technologies, with the gut emerging as an ecosystem of particular interest. While the effects of an altered gut microbiome (dysbiosis) may not apply to all chronic diseases, there are conditions, disease-related complications and co-morbidities linked to gut microbial dysbiosis. This is especially true in chronic gastrointestinal and respiratory conditions. Affected children are at risk of an imbalanced diet as well as mental health difficulties, which in turn can influence eating behaviours, attitudes and nutritional intake.<sup>5 6</sup> Some of these conditions also require lifelong dietary modifications; for example, cystic fibrosis (CF).<sup>7</sup> Additionally, the complex interaction between microbiota (i.e. bacteria), available nutrients and the immune system is essential in maintaining homeostasis and fighting against invading pathogens at mucosal sites.<sup>8</sup> An important limitation common to most current publications on the human intestinal microbiome in chronic childhood disease(s) is the lack of quantifiable dietary data, as the diet has a marked influence on gut microbiota in health.<sup>9</sup>

The principles and framework of this research program were developed to be applicable to many chronic gastrointestinal and/or respiratory conditions of childhood. Due to the clinical and/or research expertise of the authors and for the purposes of this manuscript, we will describe this program based on three relevant chronic diseases: (i) CF, (ii) obstructive sleep

1  
2  
3 apnoea (OSA), and Hirschsprung's disease (HSCR). These conditions all have reported or  
4 expected changes in their intestinal and/or respiratory microbiomes.  
5  
6  
7  
8  
9

10 CF is the most common life-shortening recessive disease in Caucasians.<sup>10</sup> It is characterised by  
11 intestinal malabsorption, impaired growth and nutrition, and lung disease.<sup>11</sup> In CF, a high  
12 calorie, high fat diet (110-200% of recommended daily energy intake) is advised to prevent  
13 malnutrition and optimise growth.<sup>7</sup> Recent reports suggest that children tend to achieve the  
14 recommended CF diet primarily by overconsumption of energy-dense, nutrient-poor foods  
15 rather than nutrient-dense foods.<sup>12</sup> We have previously reported that children with CF, from as  
16 early as infancy, have alterations in their gut microbiota, impaired innate immunity and  
17 intestinal inflammation.<sup>13-17</sup> We have also observed that poor growth in children with CF is  
18 significantly correlated with the degree of intestinal inflammation.<sup>14</sup> The aetiology of gut  
19 microbial dysbiosis and inflammation in CF remains unclear. It is plausible that dietary intake  
20 plays a role, as enteric fat abundance (from a high-fat diet) may select for a pro-inflammatory  
21 microbiota.<sup>18 19</sup> Alterations in intestinal metabolomic<sup>20</sup> and proteomic<sup>21</sup> profiles have also been  
22 reported. As the life expectancy of CF patients improves, age-related diseases such as  
23 gastrointestinal malignancies and cardiovascular disease (e.g. myocardial infarcts in adults  
24 with CF) are a growing concern.<sup>22</sup> Thus, optimal strategies to optimise health and reduce  
25 disease risk factors need to be determined.  
26  
27  
28  
29  
30  
31  
32  
33  
34  
35  
36  
37  
38  
39  
40  
41  
42  
43  
44  
45  
46  
47  
48

49 In children, OSA can have cardiovascular, neurocognitive and behavioural consequences.<sup>23</sup>  
50 Murine studies suggest intermittent hypoxia, hypercapnia and sleep fragmentation promote  
51 intestinal dysbiosis, increased visceral fat mass, systemic inflammation and atherosclerosis.<sup>24-</sup>  
52  
53  
54  
55  
56  
57  
58  
59  
60

1  
2  
3 rats<sup>28</sup> suggest the possibility of influencing clinical outcomes through affecting the gut  
4 microbiome. In adult studies, OSA is associated with gut epithelial damage,<sup>29</sup> and nasal  
5 dysbiosis and inflammation.<sup>30</sup>  
6  
7  
8  
9

10  
11  
12 HSCR is a congenital disorder where the distal intestine is aganglionic for a variable length.  
13  
14 This results in a functional bowel obstruction that usually presents in newborns. Following  
15 corrective surgery, children often have ongoing intestinal symptoms, and Hirschsprung-  
16 associated enterocolitis (HAEC) remains the most frequent complication. This may result in  
17 frequent hospitalisations and even mortality. Children with and without HAEC often have an  
18 altered intestinal microbiome<sup>31</sup> and altered composition of short chain fatty acids (SCFA).<sup>32</sup>  
19  
20  
21  
22  
23  
24  
25  
26  
27

28  
29 To the best of our knowledge, there are no publications on the intestinal virome (i.e. viruses)  
30 in children with CF, OSA or HSCR. Bacteriophages (viruses which infect bacteria) can  
31 influence bacterial populations via host lysis and horizontal gene transfer, as well as indirectly  
32 regulate immune function and inflammation.<sup>33-36</sup>  
33  
34  
35  
36  
37  
38  
39

40  
41 Despite accumulating evidence linking health, diet and the microbiomes, there is a paucity of  
42 research exploring this simultaneously in the context of chronic paediatric disease.<sup>37</sup>  
43  
44 Furthermore, potential gut-brain<sup>38</sup> and gut-lung<sup>39</sup> axes have yet to be well characterised in these  
45 conditions. The gut-brain-axis refers to the bi-directional communication between the central  
46 nervous systems and gut microbiome, and is mediated by neural, endocrine and immune  
47 pathways.<sup>40</sup> The gut-lung axis refers to the bi-directional relationship between the gut and  
48 lungs, as there appears to be an immunological relationship between them.<sup>39 41</sup> Simultaneous,  
49  
50  
51  
52  
53  
54  
55  
56  
57  
58  
59  
60 longitudinal studies using an integrated “omics” approach will help to identify the functional  
consequences and pathogenic mechanisms that occur within the altered intestinal and



1  
2  
3 respiratory milieu in chronic conditions. By exploring disease mechanisms and environmental  
4 interactions (e.g. diet) we may in turn develop insights into potential therapeutic strategies.  
5  
6 Additionally, we may be able to identify whether diet may be amenable to specific  
7  
8 modifications which may in turn benefit the intestinal microbiome.  
9  
10  
11  
12  
13

14 The EARTH Program has been established to provide a structured approach to analysing the  
15 gastrointestinal and respiratory microbiomes and diet in children with a chronic gastrointestinal  
16 and/or respiratory condition. The design improves efficiency by recruiting and assessing a  
17 healthy control (HC) group which can be used for comparison against each of the conditions  
18 (as opposed to recruiting a new HC group for each condition). Although our initial design is  
19 focused on CF, OSA and HSCR, the program framework is applicable to other chronic  
20 gastrointestinal and/or respiratory conditions of childhood.  
21  
22  
23  
24  
25  
26  
27  
28  
29  
30  
31  
32

## 33 **OBJECTIVES**

34  
35 The objective of this research program is to evaluate and compare children with a chronic  
36 gastrointestinal and/or respiratory condition and age and gender matched HC. The primary  
37 objectives include analysing the intestinal and respiratory microbiomes (using an integrated  
38 “omics” approach) and dietary intake using validated, parent-report tools (Table 1). The  
39 secondary objectives are also presented in Table 1 and include evaluating:  
40  
41  
42  
43  
44  
45  
46

- 47 1. Known inflammatory biomarkers.
- 48 2. Symptomatology and health-related quality of life (HRQOL) using validated measures.
- 49 3. Phenotypic and clinical information.
- 50 4. Sociodemographic factors
- 51
- 52
- 53
- 54
- 55
- 56
- 57
- 58
- 59
- 60

1  
2  
3 Additional secondary objectives include correlating within children with the same condition:  
4

5 (i) dietary intake with the intestinal microbiome; (ii) dietary intake with the respiratory  
6 microbiome; and (iii) the intestinal and respiratory microbiomes.  
7  
8  
9

10  
11  
12 We hypothesise that:  
13

- 14 (i) Children with chronic gastrointestinal and/or respiratory conditions will have  
15 altered intestinal and respiratory microbiomes compared to healthy children, and  
16  
17 (ii) Diet plays a key role in influencing the intestinal and respiratory microbiomes and  
18 this may impact on clinical outcomes, biomarkers of disease, and health-related  
19 quality of life.  
20  
21  
22  
23  
24  
25  
26  
27  
28

29 To our knowledge, this program will enable the first series of studies comparing the intestinal  
30 and respiratory microbiomes and diet in children with chronic gastrointestinal and/or  
31 respiratory conditions. Initial results will be hypothesis-generating and used to direct future  
32 studies tailored to a specific focus or line of inquiry. Additionally, studies from this research  
33 program have potential for direct translation into clinical care as diet is a highly modifiable  
34 factor.  
35  
36  
37  
38  
39  
40  
41  
42  
43  
44  
45  
46  
47  
48  
49  
50  
51  
52  
53  
54  
55  
56  
57  
58  
59  
60

| Domain                      | Data Source                                                             | Technique                                                  | Outcome Measures                                          | Between Group Analyses*                                                  | Within Group Analyses†                                                                                                                  |                                                     |
|-----------------------------|-------------------------------------------------------------------------|------------------------------------------------------------|-----------------------------------------------------------|--------------------------------------------------------------------------|-----------------------------------------------------------------------------------------------------------------------------------------|-----------------------------------------------------|
| <b>Primary Objectives</b>   |                                                                         |                                                            |                                                           |                                                                          |                                                                                                                                         |                                                     |
| 1. Intestinal Microbiome    | 1. Stool sample                                                         | Bacterial communities (16S rRNA (V4) <sup>13</sup> or MSS) | Alpha diversity (richness and Shannon index)              | Student <i>t</i> -test or Wilcoxon signed-rank test                      | Pearson or Spearman correlations with:<br>• Gastrointestinal microbiome<br>• Respiratory microbiome<br>• Diet<br>• Secondary objectives |                                                     |
|                             |                                                                         |                                                            | Beta diversity (UNIFRAC distances <sup>42</sup> )         | PERMANOVA <sup>43</sup>                                                  |                                                                                                                                         |                                                     |
|                             |                                                                         |                                                            | Relative abundances of bacteria                           | ANCOM <sup>44</sup>                                                      |                                                                                                                                         |                                                     |
|                             | 2. Respiratory Microbiome                                               | 2. Oropharyngeal swab or sputum sample                     | Viral communities (metagenomic sequencing <sup>45</sup> ) | Alpha diversity (richness and Shannon index)                             |                                                                                                                                         | Student <i>t</i> -test or Wilcoxon signed-rank test |
|                             |                                                                         |                                                            |                                                           | Beta diversity (Bray-Curtis dissimilarities)                             |                                                                                                                                         | PERMANOVA <sup>43</sup>                             |
|                             |                                                                         |                                                            |                                                           | Relative abundances of viruses                                           |                                                                                                                                         | ANCOM <sup>44</sup>                                 |
| 2. Respiratory Microbiome   | 2. Oropharyngeal swab or sputum sample                                  | Proteomics (LC-MS <sup>21</sup> )                          | Protein z-score normalised LFQ intensities                | Student <i>t</i> -test                                                   |                                                                                                                                         |                                                     |
|                             |                                                                         |                                                            | Pathway/network upregulation or downregulation            | Condition/HC ratio                                                       |                                                                                                                                         |                                                     |
|                             |                                                                         | Metabolomics (UHPLC-MS/MS <sup>20</sup> )                  | Metabolite normalised abundance                           | Student <i>t</i> -test                                                   |                                                                                                                                         |                                                     |
| 3. Diet                     | i. ACAES (ages 2 to 18yr)<br>ii. 24-hour food recall (ages 0 up to 2yr) |                                                            | Energy intake                                             | Student <i>t</i> -test, Wilcoxon signed-rank test or Fisher's Exact Test |                                                                                                                                         |                                                     |
|                             |                                                                         |                                                            | Percent energy from core foods                            |                                                                          |                                                                                                                                         |                                                     |
|                             |                                                                         |                                                            | Macronutrient intake                                      |                                                                          |                                                                                                                                         |                                                     |
|                             |                                                                         |                                                            | Micronutrient intake                                      |                                                                          |                                                                                                                                         |                                                     |
| 3. Diet                     | i. ACAES (ages 2 to 18yr)<br>ii. 24-hour food recall (ages 0 up to 2yr) |                                                            | Diet quality score <sup>‡</sup>                           | Student <i>t</i> -test, Wilcoxon signed-rank test or Fisher's Exact Test |                                                                                                                                         |                                                     |
|                             |                                                                         |                                                            |                                                           |                                                                          |                                                                                                                                         |                                                     |
|                             |                                                                         |                                                            |                                                           |                                                                          |                                                                                                                                         |                                                     |
|                             |                                                                         |                                                            |                                                           |                                                                          |                                                                                                                                         |                                                     |
| <b>Secondary Objectives</b> |                                                                         |                                                            |                                                           |                                                                          |                                                                                                                                         |                                                     |
| 1. Biomarkers               | Stool, oropharyngeal                                                    | ELISA                                                      | Inflammation (calprotectin, M2-PK, CRP & interleukins)    | Student <i>t</i> -test, Wilcoxon signed-rank test or Fisher's Exact Test | Descriptive                                                                                                                             |                                                     |

|                                      |                                                                                           |                                                                                             |                                                                          |             |
|--------------------------------------|-------------------------------------------------------------------------------------------|---------------------------------------------------------------------------------------------|--------------------------------------------------------------------------|-------------|
|                                      | swab or sputum sample                                                                     |                                                                                             |                                                                          |             |
| 2. Symptomatology & HRQOL            | PedsQL Infant Scales (0-2yr) & Gastrointestinal Symptoms Module (2-18yr) <sup>46-48</sup> | HRQOL and gastrointestinal symptoms.                                                        | Student <i>t</i> -test, Wilcoxon signed-rank test or Fisher's Exact Test | Descriptive |
|                                      | Rome IV Questionnaire <sup>49 50</sup>                                                    | Gastrointestinal symptoms                                                                   |                                                                          |             |
|                                      | Spence Children's Anxiety Scale <sup>51 52</sup>                                          | Anxiety symptoms                                                                            |                                                                          |             |
|                                      | Short Mood and Feelings Questionnaires <sup>53 54</sup>                                   | Depressive symptoms                                                                         |                                                                          |             |
| 3. Phenotypic & Clinical Information | Anthropometrics                                                                           | Z-scores; weight, length/height, weight-for-length (ages 0 to 2yr) and BMI (ages 2 to 20yr) | Student <i>t</i> -test, Wilcoxon signed-rank test or Fisher's Exact Test | Descriptive |
|                                      | Clinical presentations                                                                    | Number and length of hospitalisations, emergency department presentations, medications      |                                                                          |             |
|                                      | Results                                                                                   | Biochemistry, microbiology and imaging results                                              |                                                                          |             |
|                                      | Perinatal factors                                                                         | Mode of delivery, feeding during infancy                                                    |                                                                          |             |
| 4. Socio-demographic factors         |                                                                                           | Ethnicity                                                                                   | Descriptive                                                              | Descriptive |
|                                      |                                                                                           | SEIFA Code <sup>55</sup>                                                                    | Descriptive                                                              | Descriptive |

**Table 1.** Primary and secondary objectives with related outcome measures. All samples, questionnaires and data will be collected from all participants at each time-point. \*Between group analyses describe comparisons between a condition and healthy control groups. †Within group analyses describe analyses of two outcome measures within subjects of the same condition group. ‡ACAES only. ACAES, Australian Child and Adolescent Eating Survey; CRP, C-reactive protein; ELISA, enzyme-linked immunosorbent assay; HC, healthy control; LC-MS, liquid chromatography-mass spectrometry; HRQOL, health-related quality of life; MSS, metagenomic shotgun sequencing; M2-PK, M2 pyruvate kinase;

1  
2  
3  
4  
5  
6  
7  
8  
9  
10  
11  
12  
13  
14  
15  
16  
17  
18  
19  
20  
21  
22  
23  
24  
25  
26  
27  
28  
29  
30  
31  
32  
33  
34  
35  
36  
37  
38  
39  
40  
41  
42  
43  
44  
45  
46

PERMANOVA, permutational multivariate analysis of variance; SEIFA, Socio-Economic Indexes for Areas (a measure of relative socio-economic advantage and disadvantage in Australia).

For peer review only

## METHODS AND ANALYSES

### Study design

The EARTH program provides a framework for a series of prospective, longitudinal, controlled, observational studies, with each individual study comparing children with a chronic gastrointestinal and/or respiratory condition to HC. A single healthy control group will be used for comparison against all conditions and healthy controls are defined as children who are free of any chronic disease. The standardised methodological approach will also allow for comparisons between different health conditions. The SPIRIT reporting guidelines were used for this protocol.<sup>56</sup>

### Setting

Studies will be carried out at a single centre; the Sydney Children's Hospital (SCH) in Randwick, Australia. SCH is a tertiary paediatric hospital.

### Participants

Children are eligible if they:

- Are aged between 0 and 18 years;
- Have been diagnosed with a chronic gastrointestinal and/or respiratory condition defined by consensus diagnostic criteria; or
- Are free of any chronic health condition (healthy control group); and
- Have a parent(s)/carer(s) who provides informed consent, or are at least 16 years old and provide informed consent.

Ineligibility criteria include:

- Children with more than one concurrent or unrelated chronic disease;
- Inability to comply with study requirements;

- Parent(s)/guardian(s) are unable to speak English or do not have a reading level age of at least 12 years.

Participants with a chronic gastrointestinal and/or respiratory condition will be matched to a HC for gender and age (as closely as possible).

### **Recruitment Strategy**

Participants with chronic gastrointestinal and/or respiratory conditions will be approached at their routine clinic appointments in the outpatient department. Flyers will be placed in the hospital for recruitment of HC. Prior to study participation, detailed written and verbal information will be provided about the content and extent of the study. Written informed consent from the parent/legal guardian of each participant will be required. If the child is deemed Gillick competent,<sup>57</sup> they will be encouraged to sign a specific child assent form. Parents/legal guardians and participants may withdraw consent at any time.

### **Outcome Measures**

The outcomes measures are presented in Table 1. All samples, questionnaires and data will be collected from all participants at each time-point. Presented below is a simplified explanation of each outcome/variable included in the research program.

#### *Primary outcomes/variables*

1. Intestinal microbiome assessed from a stool sample using one or more of:
  - i. Bacterial community analysis (16S rRNA (V4)<sup>13</sup> or metagenomic shotgun sequencing):
    - a. Alpha diversity indices:
      - (i) Richness: the total number of unique species.<sup>58</sup>

- 1  
2  
3 (ii) Shannon index: a measure of both species abundance and  
4 evenness.<sup>59</sup>  
5  
6  
7  
8 b. Beta diversity indices:  
9  
10 (i) UniFrac: a distance metric used to compare biological  
11 communities that incorporates phylogenetic distances between  
12 observed organisms.<sup>42</sup>  
13  
14 (ii) Bray-Curtis dissimilarity: a count metric used to quantify the  
15 compositional dissimilarity between two different sites.<sup>60</sup>  
16  
17  
18 c. Relative abundance: the percent composition of an organism relative to  
19 the total number of organisms in the area.<sup>61</sup>  
20  
21  
22  
23  
24  
25  
26 ii. Viral community analysis (metagenomic sequencing<sup>45</sup>), as above for bacterial  
27 community analysis.  
28  
29  
30  
31 iii. Proteomics (liquid chromatography-mass spectrometry (LC-MS)<sup>21</sup>):  
32  
33 a. Protein z-score normalised label-free quantification (LFQ) intensities.  
34  
35 b. Pathway/network upregulation or downregulation based on the ratio of  
36 condition/HC.  
37  
38  
39  
40 iv. Metabolomics (ultra-high performance liquid chromatography-tandem mass  
41 spectrometry (UHPLC-MS/MS)<sup>20</sup>):  
42  
43 a. Metabolite normalised abundance.  
44  
45 b. Pathway/network upregulation or downregulation based on the ratio of  
46 condition/HC.  
47  
48  
49  
50  
51 2. Respiratory microbiome assessed from an oropharyngeal swab or sputum sample, using  
52 one or more of the techniques listed above (1a–d).  
53  
54  
55 i. A sputum sample will be obtained in children able to expectorate and an  
56 oropharyngeal swab will be collected in children unable to expectorate.  
57  
58  
59  
60



- 1  
2  
3 a. Associations with the intestinal microbiome (1) will be used to explore  
4  
5 the gut-lung axis.  
6  
7
- 8 3. Dietary intake assessed using a validated semi-quantitative food frequency  
9  
10 questionnaire (FFQ):  
11  
12 i. For participants aged 0 up to 2 years, a 24-hour food recall:  
13  
14 a. Energy intake, percentage energy from core foods, macronutrient intake  
15  
16 (total intake and proportion of energy intake) and micronutrient intake  
17  
18 (total intake and proportion of energy intake).  
19  
20  
21 ii. For participants aged 2 to 18 years, the Australian Child and Adolescent Eating  
22  
23 Survey (ACAES).<sup>62-65</sup> The ACAES is a validated food frequency questionnaire  
24  
25 (120 items, semi quantitative) used to quantify food and nutrient intake over the  
26  
27 preceding six months, developed and validated for use in Australian children:  
28  
29  
30 a. Energy intake, percentage energy from core foods, macronutrient intake  
31  
32 (total intake and proportion of energy intake), micronutrient intake (total  
33  
34 intake and proportion of energy intake) and overall diet quality score.  
35  
36  
37  
38  
39

#### 40 *Secondary outcomes/variables*

- 41  
42 1. Faecal and respiratory inflammatory biomarkers, such as calprotectin, M2 pyruvate  
43  
44 kinase (M2-PK), C-reactive protein (CRP) and interleukins.  
45  
46  
47 2. Symptomatology and health-related quality of life (HRQOL) will be collected directly  
48  
49 from children where age-appropriate measures exist and/or parents using age-  
50  
51 appropriate measures:  
52  
53 a. PedsQL Infant Scales (0-2yr) & Gastrointestinal Symptoms Module (2-  
54  
55 18yr)<sup>46-48</sup> (HRQOL and gastrointestinal symptoms).  
56  
57  
58  
59  
60



## Procedures

Each participant will be assessed on three occasions over a 12-month period; at study entry, 6- and 12-month follow-up. At each time-point, the following will be collected:

- A stool sample;
- An oropharyngeal swab or sputum sample (a sputum sample will be obtained in children able to expectorate and an oropharyngeal swab will be collected in children unable to expectorate);
- Dietary intake measured using the ACAES (2 to 18 years) or 24-hour food recall (0 up to 2 years);
- A secure, password-protected online survey comprising:
  - i. PedsQL Infant Scales (0-2yr) & Gastrointestinal Symptoms Module (2-18yr),<sup>46-48</sup> tailored to age;
  - ii. Rome IV Questionnaire<sup>49 50</sup> (0 to 18 years);
  - iii. Spence Children's Anxiety Scale<sup>51 52</sup> (3 to 18 years);
  - iv. Short Mood and Feelings Questionnaires<sup>53 54</sup> (6 to 18 years);
  - v. Clinical and biochemical results obtained through routine care and hospitalisations (if available);
  - vi. Sociodemographic factors (baseline survey only);
- Anthropometrics: height, weight and BMI z-scores.

### *Details regarding sample and data collection*

Stool samples will be collected in a sterile specimen jar using a Feces Catcher (Abbexa Ltd, Cambridge, UK). Sputum samples will be collected from children who are able to expectorate and oropharyngeal swabs will be collected in those children who cannot expectorate sputum. All samples will be transported in a cooler bag (with a -18°C ice pack) to the hospital laboratory

1  
2  
3 within 24 hours of collection. Stool, oropharyngeal swab and sputum samples will be aliquoted  
4 and stored at -80 °C. Where practical, samples will be collected at least four weeks after  
5 completion of oral/intravenous antibiotic therapy (excluding prophylactic antibiotics) or an  
6 acute infectious illness.  
7  
8  
9  
10  
11  
12  
13

14 For children aged 0 up to 2 years, a 24-hour dietary recall will be conducted by a study  
15 dietician. For children aged 2 to 18 years, the ACAES will be completed online by  
16 parents/guardians or by the child themselves if aged over 14 years.  
17  
18  
19  
20  
21  
22  
23

24 Participant clinical information and questionnaires will be collected using the Qualtrics Online  
25 Survey Software Tool ([www.qualtrics.com](http://www.qualtrics.com)), which is distributed via a secure email link.  
26 Qualtrics is a secure, password-protected platform, which allows for the distribution of  
27 electronic surveys and collection of data. The surveys are programmed to be condition/control-  
28 specific and facilitate a personalised flow depending on the time-point of the study and the age  
29 of the participant (to facilitate administration of age-appropriate questionnaires). Further  
30 details on each of the measures used for evaluating symptomatology and HRQOL are presented  
31 in Table 2. Clinical and biochemical results will be obtained via the SCH electronic medical  
32 record system and recorded in a Qualtrics survey.  
33  
34  
35  
36  
37  
38  
39  
40  
41  
42  
43  
44  
45  
46

47 Participants will be measured for their height and weight using standardised methods.  
48  
49  
50  
51  
52  
53  
54  
55  
56  
57  
58  
59  
60

| Measure                                                                                                             | Domains (Items)                                                                                                                                                                                                                                                                                                                                                            | Scoring                                                                     | Interpretation                         |
|---------------------------------------------------------------------------------------------------------------------|----------------------------------------------------------------------------------------------------------------------------------------------------------------------------------------------------------------------------------------------------------------------------------------------------------------------------------------------------------------------------|-----------------------------------------------------------------------------|----------------------------------------|
| <i>i. PedsQL</i>                                                                                                    |                                                                                                                                                                                                                                                                                                                                                                            |                                                                             |                                        |
| Infant Scales - Parent report for infants (ages 1-12 months) <sup>48</sup>                                          | Total (36): 5-point LS. Physical Functioning (6), Physical Symptoms (10), Emotional Functioning (12), Social Functioning (4), Cognitive Functioning (4).                                                                                                                                                                                                                   | Items are reverse scored and linearly transformed on a scale from 0 to 100. | Higher scores indicate better HRQOL    |
| Infant Scales - Parent report for infants (ages 13-24 months) <sup>48</sup>                                         | Total (45): 5-point LS. Physical Functioning (9), Physical Symptoms (10), Emotional Functioning (12), Social Functioning (5), Cognitive Functioning (9).                                                                                                                                                                                                                   | Items are reverse scored and linearly transformed on a scale from 0 to 100. | Higher scores indicate better HRQOL    |
| 3.0 Gastrointestinal Symptoms Module – Parent report for toddlers (ages 2-4) <sup>46 47</sup>                       | Total (74): 5-point LS. Stomach Pain and Hurt (6), Stomach Discomfort When Eating (5), Food and Drink Limits (6), Trouble Swallowing (3), Heart Burn and Reflux (4), Nausea and Vomiting (4), Gas and Bloating (7), Constipation (14), Blood in Poop (2), Diarrhoea (7), Worry About Going Poop (5), Worry About Stomach Aches (2), Medicines (4), Communication (5).      | Items are reverse scored and linearly transformed on a scale from 0 to 100. | Higher scores indicate lower problems. |
| Gastrointestinal symptoms module (Acute Version 3.0) – Parent report for young children (ages 5-7) <sup>46 47</sup> | Total (74): 3- & 5-point LS. Stomach Pain and Hurt (6), Stomach Discomfort When Eating (5), Food and Drink Limits (6), Trouble Swallowing (3), Heart Burn and Reflux (4), Nausea and Vomiting (4), Gas and Bloating (7), Constipation (14), Blood in Poop (2), Diarrhoea (7), Worry About Going Poop (5), Worry About Stomach Aches (2), Medicines (4), Communication (5). | Items are reverse scored and linearly transformed on a scale from 0 to 100. | Higher scores indicate lower problems. |
| Gastrointestinal symptoms module (Acute Version 3.0) – Young child report (ages 5-7) <sup>46 47</sup>               |                                                                                                                                                                                                                                                                                                                                                                            |                                                                             |                                        |
| Gastrointestinal symptoms module (Acute Version 3.0) – Parent                                                       | Total (74): 3- & 5-point LS. Stomach Pain and Hurt (6), Stomach Discomfort When Eating (5), Food and Drink Limits (6),                                                                                                                                                                                                                                                     | Items are reverse scored and linearly transformed on a scale                | Higher scores indicate lower problems. |

|                                                                                                              |                                                                                                                                                                                                                                          |                                                                                                                                                                                                                                                                                                                                                                                                              |  |
|--------------------------------------------------------------------------------------------------------------|------------------------------------------------------------------------------------------------------------------------------------------------------------------------------------------------------------------------------------------|--------------------------------------------------------------------------------------------------------------------------------------------------------------------------------------------------------------------------------------------------------------------------------------------------------------------------------------------------------------------------------------------------------------|--|
| report for children (ages 8-12) <sup>46 47</sup>                                                             | (4), Nausea and Vomiting (4), Gas and Bloating (7), Constipation (14), Blood in Poop (Bowel Movement) (2), Diarrhoea (7), Worry About Going Poop (Bowel Movements) (5), Worry About Stomach Aches (2), Medicines (4), Communication (5). |                                                                                                                                                                                                                                                                                                                                                                                                              |  |
| Gastrointestinal symptoms module (Acute Version 3.0) – Child report (ages 8-12) <sup>46 47</sup>             |                                                                                                                                                                                                                                          |                                                                                                                                                                                                                                                                                                                                                                                                              |  |
| Gastrointestinal symptoms module (Acute Version 3.0) – Parent report for teens (ages 13-18) <sup>46 47</sup> |                                                                                                                                                                                                                                          |                                                                                                                                                                                                                                                                                                                                                                                                              |  |
| Gastrointestinal symptoms module (Acute Version 3.0) – Teens report (ages 13-18) <sup>46 47</sup>            |                                                                                                                                                                                                                                          |                                                                                                                                                                                                                                                                                                                                                                                                              |  |
| <b>ii. Rome IV</b>                                                                                           |                                                                                                                                                                                                                                          |                                                                                                                                                                                                                                                                                                                                                                                                              |  |
| Rome IV – Parent-Report Form for Infants and Toddlers (ages 0-3) (R49QG-toddler) <sup>49</sup>               | Total (29 for ages 0-12 months; 18 for ages 1-3 years):<br>Infant gastrointestinal problems (11), Vomiting (9), Bowel Movements (9)                                                                                                      | Defined diagnostic criteria for functional gastrointestinal disorders in neonates and toddlers: <sup>49</sup><br>Infant regurgitation, Infant rumination syndrome, Cyclic vomiting syndrome, Infant colic, Functional diarrhoea, Infant dyschezia, Functional constipation.                                                                                                                                  |  |
| Parent-Report Form for Children and Adolescents (4 years of age and older) (R4PDQ-child) <sup>50</sup>       | Total (42):<br>Belly ache and uncomfortable feelings above the belly button (12), Belly aches and abdominal pain around and below the belly button (10), Bowel movements (7), Nausea and vomiting (9), Other symptoms (4).               | Defined diagnostic criteria for functional gastrointestinal disorders in children and adolescents: <sup>50</sup><br>Cyclic vomiting syndrome, Functional nausea and functional vomiting, Rumination syndrome, Aerophagia, Functional dyspepsia, Irritable bowel syndrome, Abdominal migraine, Functional abdominal pain – not otherwise specified, Functional Constipation, Nonretentive fecal incontinence. |  |
| Self-Report Form for Children and Adolescents (10 years of age and older) (R4PDQ-child) <sup>50</sup>        |                                                                                                                                                                                                                                          |                                                                                                                                                                                                                                                                                                                                                                                                              |  |
| <b>iii. Spence Children's Anxiety Scale</b>                                                                  |                                                                                                                                                                                                                                          |                                                                                                                                                                                                                                                                                                                                                                                                              |  |

|                                                                                                         |                                                                                                                                                                                                                                     |                                                                                                     |                                                                                                                                                                                                                 |
|---------------------------------------------------------------------------------------------------------|-------------------------------------------------------------------------------------------------------------------------------------------------------------------------------------------------------------------------------------|-----------------------------------------------------------------------------------------------------|-----------------------------------------------------------------------------------------------------------------------------------------------------------------------------------------------------------------|
| Spence – Preschool Anxiety Scale (Parent Report) (ages 0 to 4) <sup>51 52</sup>                         | Total (34): 5-point LS. Generalized anxiety (5), Social anxiety (6), Obsessive compulsive disorder (5), Physical injury fears (7), Separation anxiety (5).                                                                          | Responses are scored 0 (Not true at all) to 4 (very often true). A maximum possible score of 112.   | A score 1 SD above mean for a subscale or total score warrants further clinical investigation. A score of 0.5 SD above the mean on total score is indicative of an elevated, but not clinical level of anxiety. |
| Spence Children’s Anxiety Scale (Parent Report) (5 years and older) <sup>51 52</sup>                    | Total (38 scored, 39 total): 4-point LS. Panic attack and agoraphobia (9), Separation anxiety (6), Physical injury fears (5), Social phobia (6), Obsessive compulsive (6), Generalized anxiety disorder / overanxious disorder (6). | Responses are scored 0 (Never) to 3 (Always). A maximum possible score of 114. T-score calculation. | A score 1 SD above mean (T-score of $\geq 60$ ) for a subscale or total score is indicative of subclinical or elevated levels of anxiety warranting further clinical investigation.                             |
| Spence Children’s Anxiety Scale (8 years and older) <sup>51 52</sup>                                    | Total (38 scores, 45 total): 4-point LS. Separation anxiety (6), Social phobia (6), Obsessive compulsive (6), Panic attack and agoraphobia (9), Physical injury fears (5), Generalized anxiety (6).                                 |                                                                                                     |                                                                                                                                                                                                                 |
| <b><i>iv. Short Mood and Feelings Questionnaire</i></b>                                                 |                                                                                                                                                                                                                                     |                                                                                                     |                                                                                                                                                                                                                 |
| Mood and Feelings Questionnaire: Short Version (Parent Report on Child) (ages 6-18) <sup>53 54 66</sup> | Total (13): 3-point LS. Depressive symptoms (13).                                                                                                                                                                                   | Responses are scored 0 (Not true) to 2 (True). A maximum possible score of 26.                      | Higher scores suggest more severe depressive symptoms. A score of $\geq 12$ may indicate the presence of depression in the respondent.                                                                          |
| Mood and Feelings Questionnaire: Short Version (Child Self-Report) (ages 6-18) <sup>53 54 66</sup>      | Total (13): 3-point LS. Depressive symptoms (13).                                                                                                                                                                                   |                                                                                                     |                                                                                                                                                                                                                 |

**Table 2.** Measures for symptomatology and health-related quality of life (HRQOL). All questionnaires will be collected from all participants at each time-point. LS, Likert scale; SD, standard deviation. N.B. Disease-specific questionnaires can be added into the Qualtrics data collection form i.e. the Paediatric Sleep Questionnaire: Sleep-Disordered Breathing Subscale,<sup>67</sup> for children with OSA.

### *Sample and data processing techniques*

Processing of stool, oropharyngeal swab and sputum samples is almost identical (sparing a few initial sample preparation steps). For bacterial community analysis, DNA will be extracted using QIAamp DNA kits (QIAGEN, Hildren, Germany) according to manufacturer's instructions. For 16S rRNA gene analysis specifically, amplification will be performed with primers 515F and 806R spanning the V4 region and sequencing data will be processed using USEARCH.<sup>68</sup>

In the instance where species resolution of bacterial communities is thought to be beneficial, metagenomic shotgun sequencing (MSS) will be performed as an alternative to 16S rRNA gene sequencing. For MSS, no amplification step will be performed prior to sequencing. Sequencing data will be processed using a custom in-house pipeline.

For viral community analysis specifically, sample preparation will follow an adjusted NetoVIR (Novel Enrichment Technique Of VIRomes) protocol.<sup>45</sup> All sequencing will be performed using the Illumina MiSeq platform at the Ramaciotti Centre for Genomics at the University of New South Wales (UNSW). Briefly, sequencing data will be processed using the Vipie platform<sup>69</sup> for taxonomic assignment and Virsorter pipeline<sup>70</sup> for functional annotation.

For untargeted proteomics, samples will undergo an adjusted Debyser et al. protocol for protein extraction, gel electrophoresis and analysed using LC-MS/MS at the Bioanalytical Mass Spectrometry Facility (BMSF), UNSW.<sup>21</sup> Briefly, proteomics data will be analysed using MaxQuant<sup>71</sup> and Ingenuity Pathway Analysis (Qiagen).

For untargeted metabolomics, metabolites will be extracted in 1:1 (v:v) acetonitrile:H<sub>2</sub>O and analysed using a U3000 UHPLC system coupled to a Q-Exactive mass spectrometer (MS;



1  
2  
3 ThermoFisher Scientific) at the BMSF, UNSW. Briefly, metabolomics data will be analysed  
4  
5 using Progenesis COMET (Waters/NonLinear Dynamics).  
6  
7  
8  
9

10 Faecal and respiratory biomarkers (listed above) will be measured using enzyme-linked  
11  
12 immunosorbent assays (ELISA).  
13  
14  
15  
16

17 Nutrient intake data from the ACAES and 24-hour recall is computed using FoodWorks  
18  
19 (Version 3.02.581) and the following databases: Australian AusNut 1999 database (All Foods)  
20  
21 Revision 14 and AusFoods (Brands) Revision 5 (Xyris Software (Australia) Pty Ltd,  
22  
23 FoodWorks Professional Version 3.02.581. 2004: Brisbane Australia). Outputs include a  
24  
25 quantified estimate and the percentage of energy from a wide of range of macro- (protein, fat,  
26  
27 carbohydrate) and micro-nutrients (vitamins A, B, C and minerals such as iron, zinc and  
28  
29 calcium). In addition, overall diet quality score and the percentage of energy derived from  
30  
31 nutrient rich core foods and energy-dense, nutrient-poor discretionary foods is calculated.  
32  
33  
34  
35  
36  
37

#### 38 *Administration of patient records and data*

39  
40 At the time of consent and enrolment, participants will be assigned a unique study ID number  
41  
42 (9 alphanumeric characters). All patient records, samples and data are deidentified using the  
43  
44 unique study ID. Data will be stored securely as per ethics review board guidelines.  
45  
46  
47  
48

#### 49 *Handling of abnormal outcomes or distress*

50  
51 The well-being of participants is of utmost importance. Participants and their parents/guardians  
52  
53 will be advised to contact any of the study investigators if they have concerns regarding any  
54  
55 aspects of their participation. It is possible that thinking about one's health or the health of  
56  
57 one's child may elicit emotional distress in some participants. Depending on the nature of the  
58  
59  
60

1  
2  
3 concern or level of distress communicated, a relevant study investigator will contact the  
4 participant and/or his or her primary caregiver by telephone or in-person to assess any concerns  
5 and arrange appropriate follow-up or referral as soon as possible. Additionally, all Participant  
6 Information Sheets will provide the details for several, free, age-appropriate 24-hour  
7 telephone-based support services. All individuals will be clearly informed that choosing not to  
8 take part in the study, or withdrawing from the study at any stage, will not adversely affect  
9 their or their child's health care or relationship with hospital staff in any way.  
10  
11  
12  
13  
14  
15  
16  
17  
18  
19  
20  
21

### 22 **Bias, confounding factors and handling of missing data**

23  
24 The single-centre nature of this study is a limitation due to the restricted recruitment pool  
25 available and potential for selection bias; however, SCH is a tertiary referral centre for a diverse  
26 group of children across the state of New South Wales, which is the most populous state in  
27 Australia. Age and gender are known confounding factors for microbiome analyses and are  
28 controlled for with matching. There are rapid changes in the intestinal microbiota during the  
29 first 3 years of life, after which it becomes relatively stable.<sup>72-74</sup> Although we aim to match  
30 participants as closely as possible, our criteria for acceptable matching is as follows:  
31  
32  
33  
34  
35  
36  
37  
38  
39

- 40 • For children less than one year, age to be matched within 3 months,
- 41
- 42 • For children aged one to three years, age to be matched within 6 months,
- 43
- 44 • For children aged four years and older, age to be matched within 2 years.
- 45
- 46
- 47
- 48

49 Additional confounding factors for microbiome analyses include perinatal factors and  
50 ethnicity, for which sensitivity analyses will be performed. Condition specific medications (e.g.  
51 pancreatic enzyme replacement therapy or antibiotic therapy in CF) are potential confounders  
52 and attempts to control for these factors will be made at the analysis stage. Missing data will  
53  
54  
55  
56  
57  
58  
59  
60

1  
2  
3 be treated as missing and accounted for using linear mixed models (see statistical methods  
4  
5 below).  
6  
7  
8  
9

### 10 **Study size**

11  
12 In an exploratory research program of this nature, with multiple conditions of interest, sample  
13 size calculations for the primary outcomes are difficult. As an initial, arbitrary target, three  
14 males and three females in each of the following age ranges (0 to 5, >5 to 10, >10 to 18 years)  
15 will be recruited to account for age- and gender-related changes in microbiomes and diet. This  
16 calculation assumes that six participants will be required for most statistical tests of interest  
17 and an analysis can be performed on the smallest subgroup (e.g. six CF vs. six HC children  
18 aged 0 to 5 years). Therefore 18 participants for each condition and 18 HC (which can be used  
19 for comparison against multiple conditions) are an initial target sample size. Initial data from  
20 this sample size can then be utilised for subsequent power-focused study designs.  
21  
22  
23  
24  
25  
26  
27  
28  
29  
30  
31  
32  
33  
34  
35

### 36 **Statistical methods**

37  
38 Statistical analyses will be performed in R v3.4.4. All outcome measures will be analysed  
39 cross-sectionally and temporally. Descriptive statistics will be calculated for all outcome  
40 parameters for each cohort according to normality of distribution. Given the sample size,  
41 categorical variables will be compared using Fisher's Exact Test. Continuous variables will be  
42 analysed according to distribution with a student *t*-test or Wilcoxon signed-rank test for  
43 parametric and non-parametric data, respectively. A linear random-effects mixed model or  
44 variant of generalised linear-mixed model will be utilised to evaluate cross-sectional and  
45 temporal differences in outcome measures. This technique will allow for control of  
46 confounders and treatment of missing data as missing. Correlations between two continuous  
47 variables will be performed using Pearson or Spearman correlations according to distribution.  
48  
49  
50  
51  
52  
53  
54  
55  
56  
57  
58  
59  
60

1  
2  
3 Alpha diversity indices will be measured by richness (number of taxa) and Shannon index.  
4  
5  
6 Phylogeny- and taxonomy-based beta diversity will be calculated using UNIFRAC distances<sup>42</sup>  
7  
8 and Bray-Curtis dissimilarities, respectively, and used to generate non-metric  
9  
10 multidimensional scaling (NMDS) plots. Permutational multivariate analysis of variance  
11  
12 (PERMANOVA) tests (permutations = 1000) will be utilised to test if beta diversity  
13  
14 significantly differs between groups and age using the vegan function `adonis`.<sup>43</sup> A significant  
15  
16 difference in abundance of taxa, proteins or metabolites between groups will be assessed using  
17  
18 the ANCOM package v1.1-3.<sup>44</sup> For all analyses,  $p < 0.05$  (two-tailed) is considered significant  
19  
20 except in the instance of multiple comparisons, in which case a Benjamini & Hochberg  
21  
22 correction will be applied and  $q < 0.05$  will be considered significant.  
23  
24  
25  
26  
27  
28

## 29 **ETHICS AND DISSEMINATION**

30  
31  
32 The EARTH Research Program received ethics approval from the Sydney Children's Hospitals  
33  
34 Network Human Research Ethics Committee (HREC/18/SCHN/26). Any amendment to the  
35  
36 protocol which may impact the conduct of the study will be approved by the ethics committee  
37  
38 before implementation.  
39  
40  
41  
42

43  
44 The results of studies from this research program will be presented in international conferences  
45  
46 and will be published in peer-reviewed journals. Findings may also be presented as: (i) easy-  
47  
48 to-read summaries for participants and the community; (ii) educational lectures and seminars  
49  
50 for patients, families and the community; (iii) website and social media postings; (iv)  
51  
52 newsletter updates for study participants; (v) reports for relevant advocacy groups and funding  
53  
54 partners.  
55  
56  
57  
58  
59  
60

## **EXPECTED OUTCOMES AND SIGNIFICANCE OF THE RESEARCH PROJECT**

To our knowledge the EARTH Research Program will be the first in children with a chronic gastrointestinal and/or respiratory condition to simultaneously evaluate dietary intake and the intestinal and respiratory microbiomes. By exploring disease mechanisms and environmental interactions (i.e. diet) we may in turn develop insights into potential therapeutic strategies. Studies from this program have the potential for direct translation into clinical care as diet is a highly modifiable factor. This program also provides a structured approach for performing prospective, longitudinal, controlled, observational studies which can be simultaneously applied to multiple health conditions, and utilised a universal control cohort.

### **Acknowledgements**

The authors thank the future parents and families of our children at SCH and our healthy participants. We thank the Westfield Research Lab SCH (Dr Steven Leach), the Ramaciotti Centre for Genomics, UNSW Sydney, the Bioanalytical Mass Spectrometry Facility, UNSW Sydney (Dr Ling Zhong, Dr Nadeem Kaakoush and Dr Russell Pickford), the Virology Research Laboratory at Prince of Wales Hospital, the School of Biological, Earth and Environmental Sciences (Dr Bernd Wemheuer), and the School of Women's and Children's Health, Faculty of Medicine, UNSW Sydney (Equipment Grant 2018).

### **Author Contributions**

MJC, TK and CYO jointly conceived and designed the research program. MJC wrote the study protocol. IRM, MD, SC, SA, SSB, SW, NK, TT and AJ refined the research program design. All authors will take part in study conduct, recruitment, data management and/or analysis.

1  
2  
3 MJC, IRM and CYO prepared this manuscript and all authors read and approved the final  
4  
5 version.  
6  
7  
8  
9

### 10 **Funding Statement**

11  
12 This is an investigator-initiated research program. Funding to support medical research  
13 students is available through the Independent Learning Project scheme (involves a research  
14 term for medical students) at the University of New South Wales Sydney. Additional funding  
15 will be sought through seed grants. Dr Coffey is the recipient of the Sydney Children's Hospital  
16 Foundation PhD Scholarship and the Australian Government Department of Education and  
17 Training Australian Postgraduate Award. A/Prof Kasparian is the recipient of a National Heart  
18 Foundation of Australia Future Leader Fellowship (101229), and a 2018-2019 Harkness  
19 Fellowship in Health Care Policy and Practice from the Commonwealth Fund.  
20  
21  
22  
23  
24  
25  
26  
27  
28  
29  
30  
31  
32  
33  
34

### 35 **Competing interests**

36 The authors declare no competing interests.  
37  
38  
39  
40  
41

### 42 **Data Sharing**

43 De-identified participant data that underlies the results of publications from the EARTH  
44 program will be shared with investigators whose proposed use of the data has been approved  
45 by an independent review committee.  
46  
47  
48  
49  
50  
51

### 52 **Patient and Public Involvement**

53 No patient involved.  
54  
55  
56  
57  
58  
59  
60

## REFERENCES

1. Burns KH, Casey PH, Lyle RE, et al. Increasing prevalence of medically complex children in US hospitals. *Pediatrics* 2010;126(4):638-46. doi: 10.1542/peds.2009-1658 [published Online First: 2010/09/22]
2. Satterwhite BB. Impact of chronic illness on child and family: an overview based on five surveys with implications for management. *International journal of rehabilitation research Internationale Zeitschrift für Rehabilitationsforschung Revue internationale de recherches de readaptation* 1978;1(1):7-17. [published Online First: 1978/01/01]
3. Wijlaars LP, Gilbert R, Harelid P. Chronic conditions in children and young people: learning from administrative data. *Archives of disease in childhood* 2016;101(10):881-5. doi: 10.1136/archdischild-2016-310716 [published Online First: 2016/06/02]
4. Peterson J, Garges S, Giovanni M, et al. The NIH Human Microbiome Project. *Genome research* 2009;19(12):2317-23. doi: 10.1101/gr.096651.109 [published Online First: 2009/10/13]
5. Pinquart M, Shen Y. Depressive symptoms in children and adolescents with chronic physical illness: an updated meta-analysis. *Journal of pediatric psychology* 2011;36(4):375-84. doi: 10.1093/jpepsy/jsq104 [published Online First: 2010/11/23]
6. Conviser JH, Fisher SD, McColley SA. Are children with chronic illnesses requiring dietary therapy at risk for disordered eating or eating disorders? A systematic review. *The International journal of eating disorders* 2018;51(3):187-213. doi: 10.1002/eat.22831 [published Online First: 2018/02/23]
7. Saxby N, Painter C, Kench A, et al. Nutrition Guidelines for Cystic Fibrosis in Australia and New Zealand, ed. Scott C. Bell, Thoracic Society of Australia and New Zealand. Sydney 2017.
8. Statovci D, Aguilera M, MacSharry J, et al. The Impact of Western Diet and Nutrients on the Microbiota and Immune Response at Mucosal Interfaces. *Frontiers in immunology* 2017;8:838. doi: 10.3389/fimmu.2017.00838 [published Online First: 2017/08/15]
9. Valdes AM, Walter J, Segal E, et al. Role of the gut microbiota in nutrition and health. *BMJ (Clinical research ed)* 2018;361:k2179. doi: 10.1136/bmj.k2179 [published Online First: 2018/06/15]
10. Farrell PM, Rosenstein BJ, White TB, et al. Guidelines for diagnosis of cystic fibrosis in newborns through older adults: Cystic Fibrosis Foundation consensus report. *The Journal of pediatrics* 2008;153(2):S4-S14. doi: 10.1016/j.jpeds.2008.05.005 [published Online First: 2008/07/22]
11. Massie RJ, Olsen M, Glazner J, et al. Newborn screening for cystic fibrosis in Victoria: 10 years' experience (1989-1998). *The Medical journal of Australia* 2000;172(12):584-7. [published Online First: 2000/07/29]
12. Sutherland R, Katz T, Liu V, et al. Dietary intake of energy-dense, nutrient-poor and nutrient-dense food sources in children with cystic fibrosis. *Journal of cystic fibrosis : official journal of the European Cystic Fibrosis Society* 2018;17(6):804-10. doi: 10.1016/j.jcf.2018.03.011 [published Online First: 2018/05/05]
13. Nielsen S, Needham B, Leach ST, et al. Disrupted progression of the intestinal microbiota with age in children with cystic fibrosis. *Scientific reports* 2016;6:24857. doi: 10.1038/srep24857 [published Online First: 2016/05/05]
14. Dhaliwal J, Leach S, Katz T, et al. Intestinal inflammation and impact on growth in children with cystic fibrosis. *Journal of pediatric gastroenterology and nutrition* 2015;60(4):521-6. doi: 10.1097/mpg.0000000000000683 [published Online First: 2014/12/30]

15. Pang T, Leach ST, Katz T, et al. Elevated fecal M2-pyruvate kinase in children with cystic fibrosis: a clue to the increased risk of intestinal malignancy in adulthood? *Journal of gastroenterology and hepatology* 2015;30(5):866-71. doi: 10.1111/jgh.12842 [published Online First: 2014/11/08]
16. Ooi CY, Pang T, Leach ST, et al. Fecal Human beta-Defensin 2 in Children with Cystic Fibrosis: Is There a Diminished Intestinal Innate Immune Response? *Digestive diseases and sciences* 2015;60(10):2946-52. doi: 10.1007/s10620-015-3842-2 [published Online First: 2015/08/15]
17. Lee JM, Leach ST, Katz T, et al. Update of faecal markers of inflammation in children with cystic fibrosis. *Mediators of inflammation* 2012;2012:948367. doi: 10.1155/2012/948367 [published Online First: 2012/09/19]
18. Coffey MJ, Nightingale S, Ooi CY. Predicting a biliary aetiology in paediatric acute pancreatitis. *Archives of disease in childhood* 2013;98(12):965-9. doi: 10.1136/archdischild-2013-304462 [published Online First: 2013/09/10]
19. Coffey MJ, Nightingale S, Ooi CY. Serum lipase as an early predictor of severity in pediatric acute pancreatitis. *Journal of pediatric gastroenterology and nutrition* 2013;56(6):602-8. doi: 10.1097/MPG.0b013e31828b36d8 [published Online First: 2013/02/14]
20. Kaakoush NO, Pickford R, Jaffe A, et al. Is there a role for stool metabolomics in cystic fibrosis? *Pediatrics international : official journal of the Japan Pediatric Society* 2016;58(8):808-11. doi: 10.1111/ped.13063 [published Online First: 2016/08/25]
21. Debyser G, Mesuere B, Clement L, et al. Faecal proteomics: A tool to investigate dysbiosis and inflammation in patients with cystic fibrosis. *Journal of cystic fibrosis : official journal of the European Cystic Fibrosis Society* 2016;15(2):242-50. doi: 10.1016/j.jcf.2015.08.003 [published Online First: 2015/09/04]
22. Kosorok MR, Zeng L, West SE, et al. Acceleration of lung disease in children with cystic fibrosis after *Pseudomonas aeruginosa* acquisition. *Pediatric pulmonology* 2001;32(4):277-87. [published Online First: 2001/09/25]
23. Nixon GM, Davey M. Sleep apnoea in the child. *Australian family physician* 2015;44(6):352-5. [published Online First: 2015/07/27]
24. Moreno-Indias I, Torres M, Montserrat JM, et al. Intermittent hypoxia alters gut microbiota diversity in a mouse model of sleep apnoea. *The European respiratory journal* 2015;45(4):1055-65. doi: 10.1183/09031936.00184314 [published Online First: 2014/12/30]
25. Poroyko VA, Carreras A, Khalyfa A, et al. Chronic Sleep Disruption Alters Gut Microbiota, Induces Systemic and Adipose Tissue Inflammation and Insulin Resistance in Mice. *Scientific reports* 2016;6:35405. doi: 10.1038/srep35405 [published Online First: 2016/10/16]
26. Xue J, Zhou D, Poulsen O, et al. Intermittent Hypoxia and Hypercapnia Accelerate Atherosclerosis, Partially via Trimethylamine-Oxide. *American journal of respiratory cell and molecular biology* 2017;57(5):581-88. doi: 10.1165/rcmb.2017-0086OC [published Online First: 2017/07/06]
27. Tripathi A, Melnik AV, Xue J, et al. Intermittent Hypoxia and Hypercapnia, a Hallmark of Obstructive Sleep Apnea, Alters the Gut Microbiome and Metabolome. *mSystems* 2018;3(3) doi: 10.1128/mSystems.00020-18 [published Online First: 2018/06/14]
28. Durgan DJ, Ganesh BP, Cope JL, et al. Role of the Gut Microbiome in Obstructive Sleep Apnea-Induced Hypertension. *Hypertension (Dallas, Tex : 1979)* 2016;67(2):469-74. doi: 10.1161/hypertensionaha.115.06672 [published Online First: 2015/12/30]



29. Barcelo A, Esquinas C, Robles J, et al. Gut epithelial barrier markers in patients with obstructive sleep apnea. *Sleep medicine* 2016;26:12-15. doi: 10.1016/j.sleep.2016.01.019 [published Online First: 2016/12/23]
30. Wu BG, Sulaiman I, Wang J, et al. Severe Obstructive Sleep Apnea Is Associated with Alterations in the Nasal Microbiome and an Increase in Inflammation. *American journal of respiratory and critical care medicine* 2019;199(1):99-109. doi: 10.1164/rccm.201801-0119OC [published Online First: 2018/07/04]
31. Frykman PK, Nordenskjold A, Kawaguchi A, et al. Characterization of Bacterial and Fungal Microbiome in Children with Hirschsprung Disease with and without a History of Enterocolitis: A Multicenter Study. *PloS one* 2015;10(4):e0124172. doi: 10.1371/journal.pone.0124172 [published Online First: 2015/04/25]
32. Demehri FR, Frykman PK, Cheng Z, et al. Altered fecal short chain fatty acid composition in children with a history of Hirschsprung-associated enterocolitis. *Journal of pediatric surgery* 2016;51(1):81-6. doi: 10.1016/j.jpedsurg.2015.10.012 [published Online First: 2015/11/13]
33. Barr JJ, Auro R, Furlan M, et al. Bacteriophage adhering to mucus provide a non-host-derived immunity. *Proceedings of the National Academy of Sciences of the United States of America* 2013;110(26):10771-6. doi: 10.1073/pnas.1305923110 [published Online First: 2013/05/22]
34. Zuo T, Lu XJ, Zhang Y, et al. Gut mucosal virome alterations in ulcerative colitis. *Gut* 2019 doi: 10.1136/gutjnl-2018-318131 [published Online First: 2019/03/08]
35. Minot S, Sinha R, Chen J, et al. The human gut virome: inter-individual variation and dynamic response to diet. *Genome research* 2011;21(10):1616-25. doi: 10.1101/gr.122705.111 [published Online First: 2011/09/02]
36. Rodriguez-Brito B, Li L, Wegley L, et al. Viral and microbial community dynamics in four aquatic environments. *The ISME journal* 2010;4(6):739-51. doi: 10.1038/ismej.2010.1 [published Online First: 2010/02/12]
37. Kan JM, Cowan CSM, Ooi CY, et al. What can the gut microbiome teach us about the connections between child physical and mental health? A systematic review. *Developmental psychobiology* 2019;61(5):700-13. doi: 10.1002/dev.21819 [published Online First: 2019/01/09]
38. Dinan TG, Cryan JF. The Microbiome-Gut-Brain Axis in Health and Disease. *Gastroenterology clinics of North America* 2017;46(1):77-89. doi: 10.1016/j.gtc.2016.09.007 [published Online First: 2017/02/07]
39. He Y, Wen Q, Yao F, et al. Gut-lung axis: The microbial contributions and clinical implications. *Critical reviews in microbiology* 2017;43(1):81-95. doi: 10.1080/1040841x.2016.1176988 [published Online First: 2016/10/27]
40. Callaghan BL, Fields A, Gee DG, et al. Mind and gut: Associations between mood and gastrointestinal distress in children exposed to adversity. *Development and psychopathology* 2019:1-20. doi: 10.1017/s0954579419000087 [published Online First: 2019/03/29]
41. Barfod KK, Roggenbuck M, Hansen LH, et al. The murine lung microbiome in relation to the intestinal and vaginal bacterial communities. *BMC microbiology* 2013;13:303. doi: 10.1186/1471-2180-13-303 [published Online First: 2014/01/01]
42. Lozupone CA, Hamady M, Kelley ST, et al. Quantitative and qualitative beta diversity measures lead to different insights into factors that structure microbial communities. *Applied and environmental microbiology* 2007;73(5):1576-85. doi: 10.1128/aem.01996-06 [published Online First: 2007/01/16]
43. Anderson JL, Miles C, Tierney AC. Effect of probiotics on respiratory, gastrointestinal and nutritional outcomes in patients with cystic fibrosis: A systematic review. *Journal of*

- 1  
2  
3 *cystic fibrosis : official journal of the European Cystic Fibrosis Society*  
4 2017;16(2):186-97. doi: 10.1016/j.jcf.2016.09.004 [published Online First:  
5 2016/10/04]  
6  
7 44. Mandal S, Van Treuren W, White RA, et al. Analysis of composition of microbiomes: a  
8 novel method for studying microbial composition. *Microbial ecology in health and*  
9 *disease* 2015;26:27663. doi: 10.3402/mehd.v26.27663 [published Online First:  
10 2015/06/02]  
11 45. Conceicao-Neto N, Zeller M, Lefrere H, et al. Modular approach to customise sample  
12 preparation procedures for viral metagenomics: a reproducible protocol for virome  
13 analysis. *Scientific reports* 2015;5:16532. doi: 10.1038/srep16532 [published Online  
14 First: 2015/11/13]  
15 46. Varni JW, Bendo CB, Denham J, et al. PedsQL gastrointestinal symptoms module:  
16 feasibility, reliability, and validity. *Journal of pediatric gastroenterology and nutrition*  
17 2014;59(3):347-55. doi: 10.1097/mpg.0000000000000414 [published Online First:  
18 2014/05/09]  
19 47. Varni JW, Kay MT, Limbers CA, et al. PedsQL gastrointestinal symptoms module item  
20 development: qualitative methods. *Journal of pediatric gastroenterology and nutrition*  
21 2012;54(5):664-71. doi: 10.1097/MPG.0b013e31823c9b88 [published Online First:  
22 2011/10/20]  
23 48. Varni JW, Limbers CA, Neighbors K, et al. The PedsQL Infant Scales: feasibility, internal  
24 consistency reliability, and validity in healthy and ill infants. *Quality of life research :*  
25 *an international journal of quality of life aspects of treatment, care and rehabilitation*  
26 2011;20(1):45-55. doi: 10.1007/s11136-010-9730-5 [published Online First:  
27 2010/08/24]  
28 49. Benninga MA, Faure C, Hyman PE, et al. Childhood Functional Gastrointestinal Disorders:  
29 Neonate/Toddler. *Gastroenterology* 2016 doi: 10.1053/j.gastro.2016.02.016 [published  
30 Online First: 2016/05/05]  
31 50. Hyams JS, Di Lorenzo C, Saps M, et al. Functional Disorders: Children and Adolescents.  
32 *Gastroenterology* 2016 doi: 10.1053/j.gastro.2016.02.015 [published Online First:  
33 2016/05/05]  
34 51. Nauta MH, Scholing A, Rapee RM, et al. A parent-report measure of children's anxiety:  
35 psychometric properties and comparison with child-report in a clinic and normal  
36 sample. *Behaviour research and therapy* 2004;42(7):813-39. doi: 10.1016/s0005-  
37 7967(03)00200-6 [published Online First: 2004/05/20]  
38 52. Spence SH. Structure of anxiety symptoms among children: a confirmatory factor-analytic  
39 study. *Journal of abnormal psychology* 1997;106(2):280-97. [published Online First:  
40 1997/05/01]  
41 53. Angold A, Costello, E. J., Messer, S. C., Pickles, A., Winder, F., & Silver, D. The  
42 development of a short questionnaire for use in epidemiological studies of depression  
43 in children and adolescents. *International Journal of Methods in Psychiatric Research*  
44 1995;5:237 - 49.  
45 54. Messer SC, Angold, A., Costello, E.J., Loeber, R., Van Kammen, W., & Stouthamer-  
46 Loeber, M. Development of a short questionnaire for use in epidemiological studies of  
47 depression in children and adolescents: Factor composition and structure across  
48 development. *International Journal of Methods in Psychiatric Research* 1995;5:251-  
49 62.  
50 55. Australian Bureau of Statistics. Socio-Economic Indexes for Areas (SEIFA) Technical  
51 Paper 2016. ABS, Canberra, 2016.  
52  
53  
54  
55  
56  
57  
58  
59  
60

- 1
  - 2
  - 3
  - 4
  - 5
  - 6
  - 7
  - 8
  - 9
  - 10
  - 11
  - 12
  - 13
  - 14
  - 15
  - 16
  - 17
  - 18
  - 19
  - 20
  - 21
  - 22
  - 23
  - 24
  - 25
  - 26
  - 27
  - 28
  - 29
  - 30
  - 31
  - 32
  - 33
  - 34
  - 35
  - 36
  - 37
  - 38
  - 39
  - 40
  - 41
  - 42
  - 43
  - 44
  - 45
  - 46
  - 47
  - 48
  - 49
  - 50
  - 51
  - 52
  - 53
  - 54
  - 55
  - 56
  - 57
  - 58
  - 59
  - 60
56. Chan AW, Tetzlaff JM, Altman DG, et al. SPIRIT 2013 statement: defining standard protocol items for clinical trials. *Annals of internal medicine* 2013;158(3):200-7. doi: 10.7326/0003-4819-158-3-201302050-00583 [published Online First: 2013/01/09]
57. Wheeler R. Gillick or Fraser? A plea for consistency over competence in children. *BMJ (Clinical research ed)* 2006;332(7545):807. doi: 10.1136/bmj.332.7545.807 [published Online First: 2006/04/08]
58. Whittaker RH. EVOLUTION AND MEASUREMENT OF SPECIES DIVERSITY. *TAXON* 1972;21(2-3):213-51. doi: 10.2307/1218190
59. Shannon CE. A Mathematical Theory of Communication. *Bell System Technical Journal* 1948;27(3):379-423. doi: 10.1002/j.1538-7305.1948.tb01338.x
60. Bray JR, Curtis JT. An Ordination of the Upland Forest Communities of Southern Wisconsin. *Ecological Monographs* 1957;27(4):325-49. doi: 10.2307/1942268
61. Hubbell SP. The unified neutral theory of biodiversity and biogeography: Princeton University Press, Princeton, N.J 2001.
62. Watson JF, Collins CE, Sibbritt DW, et al. Reproducibility and comparative validity of a food frequency questionnaire for Australian children and adolescents. *The international journal of behavioral nutrition and physical activity* 2009;6:62. doi: 10.1186/1479-5868-6-62 [published Online First: 2009/09/12]
63. Burrows T, Berthon B, Garg ML, et al. A comparative validation of a child food frequency questionnaire using red blood cell membrane fatty acids. *European journal of clinical nutrition* 2012;66(7):825-9. doi: 10.1038/ejcn.2012.26 [published Online First: 2012/03/02]
64. Burrows TL, Warren JM, Colyvas K, et al. Validation of overweight children's fruit and vegetable intake using plasma carotenoids. *Obesity (Silver Spring, Md)* 2009;17(1):162-8. doi: 10.1038/oby.2008.495 [published Online First: 2008/11/11]
65. Collins CE, Burrows TL, Truby H, et al. Comparison of energy intake in toddlers assessed by food frequency questionnaire and total energy expenditure measured by the doubly labeled water method. *Journal of the Academy of Nutrition and Dietetics* 2013;113(3):459-63. doi: 10.1016/j.jand.2012.09.021 [published Online First: 2013/01/16]
66. Daviss WB, Birmaher B, Melhem NA, et al. Criterion validity of the Mood and Feelings Questionnaire for depressive episodes in clinic and non-clinic subjects. *Journal of child psychology and psychiatry, and allied disciplines* 2006;47(9):927-34. doi: 10.1111/j.1469-7610.2006.01646.x [published Online First: 2006/08/26]
67. Chervin RD, Hedger K, Dillon JE, et al. Pediatric sleep questionnaire (PSQ): validity and reliability of scales for sleep-disordered breathing, snoring, sleepiness, and behavioral problems. *Sleep medicine* 2000;1(1):21-32. [published Online First: 2000/03/25]
68. Edgar RC. Search and clustering orders of magnitude faster than BLAST. *Bioinformatics (Oxford, England)* 2010;26(19):2460-61. doi: 10.1093/bioinformatics/btq461
69. Lin J, Kramna L, Autio R, et al. Vipie: web pipeline for parallel characterization of viral populations from multiple NGS samples. *BMC genomics* 2017;18(1):378. doi: 10.1186/s12864-017-3721-7 [published Online First: 2017/05/17]
70. Roux S, Enault F, Hurwitz BL, et al. VirSorter: mining viral signal from microbial genomic data. *PeerJ* 2015;3:e985. doi: 10.7717/peerj.985 [published Online First: 2015/06/04]
71. Cox J, Mann M. MaxQuant enables high peptide identification rates, individualized p.p.b.-range mass accuracies and proteome-wide protein quantification. *Nature biotechnology* 2008;26(12):1367-72. doi: 10.1038/nbt.1511 [published Online First: 2008/11/26]
72. Yatsunencko T, Rey FE, Manary MJ, et al. Human gut microbiome viewed across age and geography. *Nature* 2012;486(7402):222-7. doi: 10.1038/nature11053 [published Online First: 2012/06/16]

- 1  
2  
3 73. Derrien M, Alvarez AS, de Vos WM. The Gut Microbiota in the First Decade of Life.  
4 *Trends Microbiol* 2019;27(12):997-1010. doi: 10.1016/j.tim.2019.08.001 [published  
5 Online First: 2019/09/03]  
6  
7 74. Milani C, Duranti S, Bottacini F, et al. The First Microbial Colonizers of the Human Gut:  
8 Composition, Activities, and Health Implications of the Infant Gut Microbiota.  
9 *Microbiol Mol Biol Rev* 2017;81(4) doi: 10.1128/mnbr.00036-17 [published Online  
10 First: 2017/11/10]  
11  
12  
13  
14  
15  
16  
17  
18  
19  
20  
21  
22  
23  
24  
25  
26  
27  
28  
29  
30  
31  
32  
33  
34  
35  
36  
37  
38  
39  
40  
41  
42  
43  
44  
45  
46  
47  
48  
49  
50  
51  
52  
53  
54  
55  
56  
57  
58  
59  
60

For peer review only

# Reporting checklist for protocol of a clinical trial.

Based on the SPIRIT guidelines.

## Instructions to authors

Complete this checklist by entering the page numbers from your manuscript where readers will find each of the items listed below.

Your article may not currently address all the items on the checklist. Please modify your text to include the missing information. If you are certain that an item does not apply, please write "n/a" and provide a short explanation.

Upload your completed checklist as an extra file when you submit to a journal.

In your methods section, say that you used the SPIRIT reporting guidelines, and cite them as:

Chan A-W, Tetzlaff JM, Altman DG, Laupacis A, Gøtzsche PC, Krleža-Jerić K, Hróbjartsson A, Mann H, Dickersin K, Berlin J, Doré C, Parulekar W, Summerskill W, Groves T, Schulz K, Sox H, Rockhold FW, Rennie D, Moher D. SPIRIT 2013 Statement: Defining standard protocol items for clinical trials. *Ann Intern Med.* 2013;158(3):200-207

|                                             |                     | Reporting Item                                                                                               | Page Number |
|---------------------------------------------|---------------------|--------------------------------------------------------------------------------------------------------------|-------------|
| <b>Administrative information</b>           |                     |                                                                                                              |             |
| Title                                       | <a href="#">#1</a>  | Descriptive title identifying the study design, population, interventions, and, if applicable, trial acronym | 1           |
| Trial registration                          | <a href="#">#2a</a> | Trial identifier and registry name. If not yet registered, name of intended registry                         | 2           |
| Trial registration: data set                | <a href="#">#2b</a> | All items from the World Health Organization Trial Registration Data Set                                     | n/a         |
| Protocol version                            | <a href="#">#3</a>  | Date and version identifier                                                                                  | n/a         |
| Funding                                     | <a href="#">#4</a>  | Sources and types of financial, material, and other support                                                  | 29          |
| Roles and responsibilities: contributorship | <a href="#">#5a</a> | Names, affiliations, and roles of protocol contributors                                                      | 1, 2, 29    |

|    |                           |                     |                                                              |      |
|----|---------------------------|---------------------|--------------------------------------------------------------|------|
| 1  | Roles and                 | <a href="#">#5b</a> | Name and contact information for the trial sponsor           | n/a  |
| 2  | responsibilities:         |                     |                                                              |      |
| 3  | sponsor contact           |                     |                                                              |      |
| 4  | information               |                     |                                                              |      |
| 5  |                           |                     |                                                              |      |
| 6  |                           |                     |                                                              |      |
| 7  | Roles and                 | <a href="#">#5c</a> | Role of study sponsor and funders, if any, in study design;  | n/a  |
| 8  | responsibilities:         |                     | collection, management, analysis, and interpretation of      |      |
| 9  | sponsor and funder        |                     | data; writing of the report; and the decision to submit the  |      |
| 10 |                           |                     | report for publication, including whether they will have     |      |
| 11 |                           |                     | ultimate authority over any of these activities              |      |
| 12 |                           |                     |                                                              |      |
| 13 |                           |                     |                                                              |      |
| 14 |                           |                     |                                                              |      |
| 15 |                           |                     |                                                              |      |
| 16 | Roles and                 | <a href="#">#5d</a> | Composition, roles, and responsibilities of the coordinating | 29   |
| 17 | responsibilities:         |                     | centre, steering committee, endpoint adjudication            |      |
| 18 | committees                |                     | committee, data management team, and other individuals       |      |
| 19 |                           |                     | or groups overseeing the trial, if applicable (see Item 21a  |      |
| 20 |                           |                     | for data monitoring committee)                               |      |
| 21 |                           |                     |                                                              |      |
| 22 |                           |                     |                                                              |      |
| 23 |                           |                     |                                                              |      |
| 24 | <b>Introduction</b>       |                     |                                                              |      |
| 25 |                           |                     |                                                              |      |
| 26 | Background and            | <a href="#">#6a</a> | Description of research question and justification for       | 6-9  |
| 27 | rationale                 |                     | undertaking the trial, including summary of relevant         |      |
| 28 |                           |                     | studies (published and unpublished) examining benefits       |      |
| 29 |                           |                     | and harms for each intervention                              |      |
| 30 |                           |                     |                                                              |      |
| 31 |                           |                     |                                                              |      |
| 32 |                           |                     |                                                              |      |
| 33 | Background and            | <a href="#">#6b</a> | Explanation for choice of comparators                        | 6-9  |
| 34 | rationale: choice of      |                     |                                                              |      |
| 35 | comparators               |                     |                                                              |      |
| 36 |                           |                     |                                                              |      |
| 37 |                           |                     |                                                              |      |
| 38 | Objectives                | <a href="#">#7</a>  | Specific objectives or hypotheses                            | 9-12 |
| 39 |                           |                     |                                                              |      |
| 40 |                           |                     |                                                              |      |
| 41 | Trial design              | <a href="#">#8</a>  | Description of trial design including type of trial (eg,     | 13   |
| 42 |                           |                     | parallel group, crossover, factorial, single group),         |      |
| 43 |                           |                     | allocation ratio, and framework (eg, superiority,            |      |
| 44 |                           |                     | equivalence, non-inferiority, exploratory)                   |      |
| 45 |                           |                     |                                                              |      |
| 46 |                           |                     |                                                              |      |
| 47 |                           |                     |                                                              |      |
| 48 | <b>Methods:</b>           |                     |                                                              |      |
| 49 | <b>Participants,</b>      |                     |                                                              |      |
| 50 | <b>interventions, and</b> |                     |                                                              |      |
| 51 | <b>outcomes</b>           |                     |                                                              |      |
| 52 |                           |                     |                                                              |      |
| 53 |                           |                     |                                                              |      |
| 54 | Study setting             | <a href="#">#9</a>  | Description of study settings (eg, community clinic,         | 13   |
| 55 |                           |                     | academic hospital) and list of countries where data will be  |      |
| 56 |                           |                     | collected. Reference to where list of study sites can be     |      |
| 57 |                           |                     |                                                              |      |
| 58 |                           |                     |                                                              |      |
| 59 |                           |                     |                                                              |      |
| 60 |                           |                     |                                                              |      |

obtained

|    |                                 |                      |                                                                                                                                                                                                                                                                                                                                                                                |
|----|---------------------------------|----------------------|--------------------------------------------------------------------------------------------------------------------------------------------------------------------------------------------------------------------------------------------------------------------------------------------------------------------------------------------------------------------------------|
| 1  |                                 |                      |                                                                                                                                                                                                                                                                                                                                                                                |
| 2  |                                 |                      |                                                                                                                                                                                                                                                                                                                                                                                |
| 3  | Eligibility criteria            | <a href="#">#10</a>  | Inclusion and exclusion criteria for participants. If applicable, eligibility criteria for study centres and individuals who will perform the interventions (eg, surgeons, psychotherapists)                                                                                                                                                                                   |
| 4  |                                 |                      |                                                                                                                                                                                                                                                                                                                                                                                |
| 5  |                                 |                      |                                                                                                                                                                                                                                                                                                                                                                                |
| 6  |                                 |                      |                                                                                                                                                                                                                                                                                                                                                                                |
| 7  |                                 |                      |                                                                                                                                                                                                                                                                                                                                                                                |
| 8  |                                 |                      |                                                                                                                                                                                                                                                                                                                                                                                |
| 9  | Interventions: description      | <a href="#">#11a</a> | Interventions for each group with sufficient detail to allow replication, including how and when they will be administered                                                                                                                                                                                                                                                     |
| 10 |                                 |                      |                                                                                                                                                                                                                                                                                                                                                                                |
| 11 |                                 |                      |                                                                                                                                                                                                                                                                                                                                                                                |
| 12 |                                 |                      |                                                                                                                                                                                                                                                                                                                                                                                |
| 13 |                                 |                      |                                                                                                                                                                                                                                                                                                                                                                                |
| 14 | Interventions: modifications    | <a href="#">#11b</a> | Criteria for discontinuing or modifying allocated interventions for a given trial participant (eg, drug dose change in response to harms, participant request, or improving / worsening disease)                                                                                                                                                                               |
| 15 |                                 |                      |                                                                                                                                                                                                                                                                                                                                                                                |
| 16 |                                 |                      |                                                                                                                                                                                                                                                                                                                                                                                |
| 17 |                                 |                      |                                                                                                                                                                                                                                                                                                                                                                                |
| 18 |                                 |                      |                                                                                                                                                                                                                                                                                                                                                                                |
| 19 |                                 |                      |                                                                                                                                                                                                                                                                                                                                                                                |
| 20 |                                 |                      |                                                                                                                                                                                                                                                                                                                                                                                |
| 21 | Interventions: adherence        | <a href="#">#11c</a> | Strategies to improve adherence to intervention protocols, and any procedures for monitoring adherence (eg, drug tablet return; laboratory tests)                                                                                                                                                                                                                              |
| 22 |                                 |                      |                                                                                                                                                                                                                                                                                                                                                                                |
| 23 |                                 |                      |                                                                                                                                                                                                                                                                                                                                                                                |
| 24 |                                 |                      |                                                                                                                                                                                                                                                                                                                                                                                |
| 25 |                                 |                      |                                                                                                                                                                                                                                                                                                                                                                                |
| 26 |                                 |                      |                                                                                                                                                                                                                                                                                                                                                                                |
| 27 | Interventions: concomitant care | <a href="#">#11d</a> | Relevant concomitant care and interventions that are permitted or prohibited during the trial                                                                                                                                                                                                                                                                                  |
| 28 |                                 |                      |                                                                                                                                                                                                                                                                                                                                                                                |
| 29 |                                 |                      |                                                                                                                                                                                                                                                                                                                                                                                |
| 30 |                                 |                      |                                                                                                                                                                                                                                                                                                                                                                                |
| 31 | Outcomes                        | <a href="#">#12</a>  | Primary, secondary, and other outcomes, including the specific measurement variable (eg, systolic blood pressure), analysis metric (eg, change from baseline, final value, time to event), method of aggregation (eg, median, proportion), and time point for each outcome. Explanation of the clinical relevance of chosen efficacy and harm outcomes is strongly recommended |
| 32 |                                 |                      |                                                                                                                                                                                                                                                                                                                                                                                |
| 33 |                                 |                      |                                                                                                                                                                                                                                                                                                                                                                                |
| 34 |                                 |                      |                                                                                                                                                                                                                                                                                                                                                                                |
| 35 |                                 |                      |                                                                                                                                                                                                                                                                                                                                                                                |
| 36 |                                 |                      |                                                                                                                                                                                                                                                                                                                                                                                |
| 37 |                                 |                      |                                                                                                                                                                                                                                                                                                                                                                                |
| 38 |                                 |                      |                                                                                                                                                                                                                                                                                                                                                                                |
| 39 |                                 |                      |                                                                                                                                                                                                                                                                                                                                                                                |
| 40 |                                 |                      |                                                                                                                                                                                                                                                                                                                                                                                |
| 41 |                                 |                      |                                                                                                                                                                                                                                                                                                                                                                                |
| 42 | Participant timeline            | <a href="#">#13</a>  | Time schedule of enrolment, interventions (including any run-ins and washouts), assessments, and visits for participants. A schematic diagram is highly recommended (see Figure)                                                                                                                                                                                               |
| 43 |                                 |                      |                                                                                                                                                                                                                                                                                                                                                                                |
| 44 |                                 |                      |                                                                                                                                                                                                                                                                                                                                                                                |
| 45 |                                 |                      |                                                                                                                                                                                                                                                                                                                                                                                |
| 46 |                                 |                      |                                                                                                                                                                                                                                                                                                                                                                                |
| 47 |                                 |                      |                                                                                                                                                                                                                                                                                                                                                                                |
| 48 |                                 |                      |                                                                                                                                                                                                                                                                                                                                                                                |
| 49 | Sample size                     | <a href="#">#14</a>  | Estimated number of participants needed to achieve study objectives and how it was determined, including clinical and statistical assumptions supporting any sample size calculations                                                                                                                                                                                          |
| 50 |                                 |                      |                                                                                                                                                                                                                                                                                                                                                                                |
| 51 |                                 |                      |                                                                                                                                                                                                                                                                                                                                                                                |
| 52 |                                 |                      |                                                                                                                                                                                                                                                                                                                                                                                |
| 53 |                                 |                      |                                                                                                                                                                                                                                                                                                                                                                                |
| 54 |                                 |                      |                                                                                                                                                                                                                                                                                                                                                                                |
| 55 | Recruitment                     | <a href="#">#15</a>  | Strategies for achieving adequate participant enrolment to reach target sample size                                                                                                                                                                                                                                                                                            |
| 56 |                                 |                      |                                                                                                                                                                                                                                                                                                                                                                                |
| 57 |                                 |                      |                                                                                                                                                                                                                                                                                                                                                                                |
| 58 |                                 |                      |                                                                                                                                                                                                                                                                                                                                                                                |
| 59 |                                 |                      |                                                                                                                                                                                                                                                                                                                                                                                |
| 60 |                                 |                      |                                                                                                                                                                                                                                                                                                                                                                                |

1 **Methods:**

2 **Assignment of**  
3 **interventions (for**  
4 **controlled trials)**  
5  
6

7  
8 Allocation: sequence [#16a](#) Method of generating the allocation sequence (eg, n/a  
9 generation computer-generated random numbers), and list of any  
10 factors for stratification. To reduce predictability of a  
11 random sequence, details of any planned restriction (eg,  
12 blocking) should be provided in a separate document that  
13 is unavailable to those who enrol participants or assign  
14 interventions  
15  
16  
17  
18

19 Allocation [#16b](#) Mechanism of implementing the allocation sequence (eg, n/a  
20 concealment central telephone; sequentially numbered, opaque, sealed  
21 mechanism envelopes), describing any steps to conceal the sequence  
22 until interventions are assigned  
23  
24  
25

26 Allocation: [#16c](#) Who will generate the allocation sequence, who will enrol n/a  
27 implementation participants, and who will assign participants to  
28 interventions  
29  
30

31 Blinding (masking) [#17a](#) Who will be blinded after assignment to interventions (eg, n/a  
32 trial participants, care providers, outcome assessors, data  
33 analysts), and how  
34  
35

36 Blinding (masking): [#17b](#) If blinded, circumstances under which unblinding is n/a  
37 emergency unblinding permissible, and procedure for revealing a participant's  
38 allocated intervention during the trial  
39  
40

41 **Methods: Data**  
42 **collection,**  
43 **management, and**  
44 **analysis**  
45  
46  
47

48  
49 Data collection plan [#18a](#) Plans for assessment and collection of outcome, baseline, 18-24  
50 and other trial data, including any related processes to  
51 promote data quality (eg, duplicate measurements,  
52 training of assessors) and a description of study  
53 instruments (eg, questionnaires, laboratory tests) along  
54 with their reliability and validity, if known. Reference to  
55 where data collection forms can be found, if not in the  
56  
57  
58  
59



protocol

|    |                            |                      |                                                                |
|----|----------------------------|----------------------|----------------------------------------------------------------|
| 1  |                            |                      |                                                                |
| 2  |                            |                      |                                                                |
| 3  | Data collection plan:      | <a href="#">#18b</a> | Plans to promote participant retention and complete            |
| 4  | retention                  |                      | follow-up, including list of any outcome data to be            |
| 5  |                            |                      | collected for participants who discontinue or deviate from     |
| 6  |                            |                      | intervention protocols                                         |
| 7  |                            |                      |                                                                |
| 8  |                            |                      |                                                                |
| 9  | Data management            | <a href="#">#19</a>  | Plans for data entry, coding, security, and storage,           |
| 10 |                            |                      | including any related processes to promote data quality        |
| 11 |                            |                      | (eg, double data entry; range checks for data values).         |
| 12 |                            |                      | Reference to where details of data management                  |
| 13 |                            |                      | procedures can be found, if not in the protocol                |
| 14 |                            |                      |                                                                |
| 15 |                            |                      |                                                                |
| 16 |                            |                      |                                                                |
| 17 |                            |                      |                                                                |
| 18 | Statistics: outcomes       | <a href="#">#20a</a> | Statistical methods for analysing primary and secondary        |
| 19 |                            |                      | outcomes. Reference to where other details of the              |
| 20 |                            |                      | statistical analysis plan can be found, if not in the protocol |
| 21 |                            |                      |                                                                |
| 22 |                            |                      |                                                                |
| 23 | Statistics: additional     | <a href="#">#20b</a> | Methods for any additional analyses (eg, subgroup and          |
| 24 | analyses                   |                      | adjusted analyses)                                             |
| 25 |                            |                      |                                                                |
| 26 |                            |                      |                                                                |
| 27 | Statistics: analysis       | <a href="#">#20c</a> | Definition of analysis population relating to protocol non-    |
| 28 | population and             |                      | adherence (eg, as randomised analysis), and any                |
| 29 | missing data               |                      | statistical methods to handle missing data (eg, multiple       |
| 30 |                            |                      | imputation)                                                    |
| 31 |                            |                      |                                                                |
| 32 |                            |                      |                                                                |
| 33 | <b>Methods: Monitoring</b> |                      |                                                                |
| 34 |                            |                      |                                                                |
| 35 |                            |                      |                                                                |
| 36 | Data monitoring:           | <a href="#">#21a</a> | Composition of data monitoring committee (DMC);                |
| 37 | formal committee           |                      | summary of its role and reporting structure; statement of      |
| 38 |                            |                      | whether it is independent from the sponsor and competing       |
| 39 |                            |                      | interests; and reference to where further details about its    |
| 40 |                            |                      | charter can be found, if not in the protocol. Alternatively,   |
| 41 |                            |                      | an explanation of why a DMC is not needed                      |
| 42 |                            |                      |                                                                |
| 43 |                            |                      |                                                                |
| 44 |                            |                      |                                                                |
| 45 |                            |                      |                                                                |
| 46 | Data monitoring:           | <a href="#">#21b</a> | Description of any interim analyses and stopping               |
| 47 | interim analysis           |                      | guidelines, including who will have access to these interim    |
| 48 |                            |                      | results and make the final decision to terminate the trial     |
| 49 |                            |                      |                                                                |
| 50 |                            |                      |                                                                |
| 51 | Harms                      | <a href="#">#22</a>  | Plans for collecting, assessing, reporting, and managing       |
| 52 |                            |                      | solicited and spontaneously reported adverse events and        |
| 53 |                            |                      | other unintended effects of trial interventions or trial       |
| 54 |                            |                      | conduct                                                        |
| 55 |                            |                      |                                                                |
| 56 |                            |                      |                                                                |
| 57 |                            |                      |                                                                |
| 58 | Auditing                   | <a href="#">#23</a>  | Frequency and procedures for auditing trial conduct, if        |
| 59 |                            |                      | n/a                                                            |
| 60 |                            |                      |                                                                |

any, and whether the process will be independent from investigators and the sponsor

## Ethics and dissemination

|                                      |                      |                                                                                                                                                                                                                                                                                     |       |
|--------------------------------------|----------------------|-------------------------------------------------------------------------------------------------------------------------------------------------------------------------------------------------------------------------------------------------------------------------------------|-------|
| Research ethics approval             | <a href="#">#24</a>  | Plans for seeking research ethics committee / institutional review board (REC / IRB) approval                                                                                                                                                                                       | 27    |
| Protocol amendments                  | <a href="#">#25</a>  | Plans for communicating important protocol modifications (eg, changes to eligibility criteria, outcomes, analyses) to relevant parties (eg, investigators, REC / IRBs, trial participants, trial registries, journals, regulators)                                                  | 27    |
| Consent or assent                    | <a href="#">#26a</a> | Who will obtain informed consent or assent from potential trial participants or authorised surrogates, and how (see Item 32)                                                                                                                                                        | 13-14 |
| Consent or assent: ancillary studies | <a href="#">#26b</a> | Additional consent provisions for collection and use of participant data and biological specimens in ancillary studies, if applicable                                                                                                                                               | 13-14 |
| Confidentiality                      | <a href="#">#27</a>  | How personal information about potential and enrolled participants will be collected, shared, and maintained in order to protect confidentiality before, during, and after the trial                                                                                                | 24    |
| Declaration of interests             | <a href="#">#28</a>  | Financial and other competing interests for principal investigators for the overall trial and each study site                                                                                                                                                                       | 29    |
| Data access                          | <a href="#">#29</a>  | Statement of who will have access to the final trial dataset, and disclosure of contractual agreements that limit such access for investigators                                                                                                                                     | 29    |
| Ancillary and post trial care        | <a href="#">#30</a>  | Provisions, if any, for ancillary and post-trial care, and for compensation to those who suffer harm from trial participation                                                                                                                                                       | 24-25 |
| Dissemination policy: trial results  | <a href="#">#31a</a> | Plans for investigators and sponsor to communicate trial results to participants, healthcare professionals, the public, and other relevant groups (eg, via publication, reporting in results databases, or other data sharing arrangements), including any publication restrictions | 27    |
| Dissemination policy:                | <a href="#">#31b</a> | Authorship eligibility guidelines and any intended use of                                                                                                                                                                                                                           | 28    |

|   |                       |                      |                                                                    |
|---|-----------------------|----------------------|--------------------------------------------------------------------|
| 1 | authorship            | professional writers |                                                                    |
| 2 | Dissemination policy: | <a href="#">#31c</a> | Plans, if any, for granting public access to the full protocol, 29 |
| 3 | reproducible research |                      | participant-level dataset, and statistical code                    |
| 4 |                       |                      |                                                                    |
| 5 |                       |                      |                                                                    |

## 6 Appendices

|    |                      |                     |                                                               |     |
|----|----------------------|---------------------|---------------------------------------------------------------|-----|
| 8  | Informed consent     | <a href="#">#32</a> | Model consent form and other related documentation            | n/a |
| 9  | materials            |                     | given to participants and authorised surrogates               |     |
| 10 |                      |                     |                                                               |     |
| 11 |                      |                     |                                                               |     |
| 12 | Biological specimens | <a href="#">#33</a> | Plans for collection, laboratory evaluation, and storage of   | 24  |
| 13 |                      |                     | biological specimens for genetic or molecular analysis in     |     |
| 14 |                      |                     | the current trial and for future use in ancillary studies, if |     |
| 15 |                      |                     | applicable                                                    |     |
| 16 |                      |                     |                                                               |     |
| 17 |                      |                     |                                                               |     |
| 18 |                      |                     |                                                               |     |

19 None The SPIRIT checklist is distributed under the terms of the Creative Commons Attribution  
 20 License CC-BY-ND 3.0. This checklist can be completed online using <https://www.goodreports.org/>, a  
 21 tool made by the [EQUATOR Network](#) in collaboration with [Penelope.ai](#)  
 22  
 23  
 24  
 25  
 26  
 27  
 28  
 29  
 30  
 31  
 32  
 33  
 34  
 35  
 36  
 37  
 38  
 39  
 40  
 41  
 42  
 43  
 44  
 45  
 46  
 47  
 48  
 49  
 50  
 51  
 52  
 53  
 54  
 55  
 56  
 57  
 58  
 59  
 60

# BMJ Open

## Evaluating the Alimentary and Respiratory Tracts in Health and disease (EARTH) research program: a protocol for prospective, longitudinal, controlled, observational studies in children with chronic disease at an Australian tertiary paediatric hospital.

|                               |                                                                                                                                                                                                                                                                                                                                                                                                                                                                                                                                                                                                                                                                                                                                                                                                                                                                                                                                                                                                                                                                                                                                                                                                                                                                                                                                                                                                                                                                                                                                                                                                                                                                                                                                                                                                                                                                                                                                                                                                                                                                                                                                                                                                                                                                                |
|-------------------------------|--------------------------------------------------------------------------------------------------------------------------------------------------------------------------------------------------------------------------------------------------------------------------------------------------------------------------------------------------------------------------------------------------------------------------------------------------------------------------------------------------------------------------------------------------------------------------------------------------------------------------------------------------------------------------------------------------------------------------------------------------------------------------------------------------------------------------------------------------------------------------------------------------------------------------------------------------------------------------------------------------------------------------------------------------------------------------------------------------------------------------------------------------------------------------------------------------------------------------------------------------------------------------------------------------------------------------------------------------------------------------------------------------------------------------------------------------------------------------------------------------------------------------------------------------------------------------------------------------------------------------------------------------------------------------------------------------------------------------------------------------------------------------------------------------------------------------------------------------------------------------------------------------------------------------------------------------------------------------------------------------------------------------------------------------------------------------------------------------------------------------------------------------------------------------------------------------------------------------------------------------------------------------------|
| Journal:                      | <i>BMJ Open</i>                                                                                                                                                                                                                                                                                                                                                                                                                                                                                                                                                                                                                                                                                                                                                                                                                                                                                                                                                                                                                                                                                                                                                                                                                                                                                                                                                                                                                                                                                                                                                                                                                                                                                                                                                                                                                                                                                                                                                                                                                                                                                                                                                                                                                                                                |
| Manuscript ID                 | bmjopen-2019-033916.R2                                                                                                                                                                                                                                                                                                                                                                                                                                                                                                                                                                                                                                                                                                                                                                                                                                                                                                                                                                                                                                                                                                                                                                                                                                                                                                                                                                                                                                                                                                                                                                                                                                                                                                                                                                                                                                                                                                                                                                                                                                                                                                                                                                                                                                                         |
| Article Type:                 | Protocol                                                                                                                                                                                                                                                                                                                                                                                                                                                                                                                                                                                                                                                                                                                                                                                                                                                                                                                                                                                                                                                                                                                                                                                                                                                                                                                                                                                                                                                                                                                                                                                                                                                                                                                                                                                                                                                                                                                                                                                                                                                                                                                                                                                                                                                                       |
| Date Submitted by the Author: | 08-Jan-2020                                                                                                                                                                                                                                                                                                                                                                                                                                                                                                                                                                                                                                                                                                                                                                                                                                                                                                                                                                                                                                                                                                                                                                                                                                                                                                                                                                                                                                                                                                                                                                                                                                                                                                                                                                                                                                                                                                                                                                                                                                                                                                                                                                                                                                                                    |
| Complete List of Authors:     | <p>Coffey, Michael; University of New South Wales, Discipline of Paediatrics, School of Women's and Children's Health, Faculty of Medicine<br/> McKay, Isabelle; University of New South Wales, Discipline of Paediatrics, School of Women's and Children's Health, Faculty of Medicine<br/> Doumit, Michael; Sydney Children's Hospital Randwick, Department of Physiotherapy<br/> Chuang, Sandra; University of New South Wales, Discipline of Paediatrics, School of Women's and Children's Health, Faculty of Medicine; Sydney Children's Hospital Randwick, Department of Respiratory<br/> Adams, Susan; Sydney Children's Hospital Randwick &amp; Neuroscience Research Australia (NeuRA), Department of Surgery; University of New South Wales, Discipline of Paediatrics, School of Women's and Children's Health &amp; School of Medical Sciences, Faculty of Medicine<br/> Stelzer-Braid, Sacha; University of New South Wales, School of Medical Sciences; Prince of Wales Hospital, Virology Research Laboratory<br/> Waters, Shafagh A; University of New South Wales, Discipline of Paediatrics, School of Women's and Children's Health, Faculty of Medicine; Molecular and Integrative Cystic Fibrosis (miCF) Research Centre<br/> Kasparian, N; University of New South Wales, Discipline of Paediatrics, School of Women's and Children's Health, Faculty of Medicine; Cincinnati Children's Center for Heart Disease and the Developing Mind, Heart Institute and the Division of Behavioral Medicine and Clinical Psychology, Cincinnati Children's Hospital Medical Center &amp; Department of Pediatrics, University of Cincinnati<br/> Thomas, Torsten; University of New South Wales, Centre for Marine Science and Innovation, School of Biological, Earth and Environmental Sciences<br/> Jaffe, Adam; University of New South Wales, Discipline of Paediatrics, School of Women's and Children's Health, Faculty of Medicine; Sydney Children's Hospital Randwick, Molecular and Integrative Cystic Fibrosis (miCF) Research Centre &amp; Department of Respiratory<br/> Katz, Tamarah; Sydney Children's Hospital Randwick, Department of Nutrition and Dietetics<br/> Ooi, Chee Y.; University of New South Wales, Discipline of Paediatrics,</p> |

1  
2  
3  
4  
5  
6  
7  
8  
9  
10  
11  
12  
13  
14  
15  
16  
17  
18  
19  
20  
21  
22  
23  
24  
25  
26  
27  
28  
29  
30  
31  
32  
33  
34  
35  
36  
37  
38  
39  
40  
41  
42  
43  
44  
45  
46  
47  
48  
49  
50  
51  
52  
53  
54  
55  
56  
57  
58  
59  
60

|                                    |                                                                                                                                                                                                      |
|------------------------------------|------------------------------------------------------------------------------------------------------------------------------------------------------------------------------------------------------|
|                                    | School of Women's and Children's Health, Faculty of Medicine; Sydney Children's Hospital Randwick, Molecular and Integrative Cystic Fibrosis (miCF) Research Centre & Department of Gastroenterology |
| <b>Primary Subject Heading</b> :   | Paediatrics                                                                                                                                                                                          |
| <b>Secondary Subject Heading</b> : | Gastroenterology and hepatology, Respiratory medicine, Research methods                                                                                                                              |
| <b>Keywords</b> :                  | PAEDIATRICS, GASTROENTEROLOGY, RESPIRATORY MEDICINE (see Thoracic Medicine), NUTRITION & DIETETICS                                                                                                   |
|                                    |                                                                                                                                                                                                      |

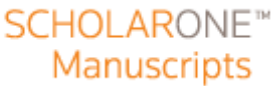



I, the Submitting Author has the right to grant and does grant on behalf of all authors of the Work (as defined in the below author licence), an exclusive licence and/or a non-exclusive licence for contributions from authors who are: i) UK Crown employees; ii) where BMJ has agreed a CC-BY licence shall apply, and/or iii) in accordance with the terms applicable for US Federal Government officers or employees acting as part of their official duties; on a worldwide, perpetual, irrevocable, royalty-free basis to BMJ Publishing Group Ltd ("BMJ") its licensees and where the relevant Journal is co-owned by BMJ to the co-owners of the Journal, to publish the Work in this journal and any other BMJ products and to exploit all rights, as set out in our [licence](#).

The Submitting Author accepts and understands that any supply made under these terms is made by BMJ to the Submitting Author unless you are acting as an employee on behalf of your employer or a postgraduate student of an affiliated institution which is paying any applicable article publishing charge ("APC") for Open Access articles. Where the Submitting Author wishes to make the Work available on an Open Access basis (and intends to pay the relevant APC), the terms of reuse of such Open Access shall be governed by a Creative Commons licence – details of these licences and which [Creative Commons](#) licence will apply to this Work are set out in our licence referred to above.

Other than as permitted in any relevant BMJ Author's Self Archiving Policies, I confirm this Work has not been accepted for publication elsewhere, is not being considered for publication elsewhere and does not duplicate material already published. I confirm all authors consent to publication of this Work and authorise the granting of this licence.

1  
2  
3  
4  
5  
6  
7  
8  
9  
10  
11  
12  
13  
14  
15  
16  
17  
18  
19  
20  
21  
22  
23  
24  
25  
26  
27  
28  
29  
30  
31  
32  
33  
34  
35  
36  
37  
38  
39  
40  
41  
42  
43  
44  
45  
46  
47  
48  
49  
50  
51  
52  
53  
54  
55  
56  
57  
58  
59  
60

**Evaluating the Alimentary and Respiratory Tracts in Health and  
disease(EARTH) research program: a protocol for prospective, longitudinal,  
controlled, observational studies in children with chronic disease at an Australian  
tertiary paediatric hospital.**

**Authors:**

Michael J Coffey,<sup>1</sup>Isabelle R McKay,<sup>1</sup>Michael Doumit,<sup>2</sup> Sandra Chuang,<sup>1,3</sup> Susan  
Adams,<sup>1,4,5,6</sup> Sacha Stelzer-Braid,<sup>5,7</sup> Shafagh A Waters,<sup>1,8</sup> Nadine A Kasparian,<sup>1,9,10</sup> Torsten  
Thomas,<sup>11</sup> Adam Jaffe,<sup>1,3,8</sup> Tamarah Katz,<sup>12</sup> Chee Y Ooi.<sup>1,7,13,\*</sup>

<sup>1</sup>Discipline of Paediatrics, School of Women's and Children's Health, University of New  
South Wales, Sydney, NSW, Australia.

<sup>2</sup>Department of Physiotherapy, Sydney Children's Hospital Randwick, Sydney, Australia.

<sup>3</sup>Department of Respiratory, Sydney Children's Hospital, High Street, Randwick NSW,  
Australia.

<sup>4</sup>Department of Surgery, Sydney Children's Hospital Randwick, Sydney, Australia.

<sup>5</sup>School of Medical Sciences, University of New South Wales, Sydney, NSW, Australia.

<sup>6</sup>Neuroscience Research Australia (NeuRA), Sydney, NSW, Australia.

<sup>7</sup>Virology Research Laboratory, Prince of Wales Hospital, Sydney, NSW, Australia.

<sup>8</sup>Molecular and Integrative Cystic Fibrosis (miCF) Research Centre, High Street, Randwick  
NSW, Australia.

<sup>9</sup>Cincinnati Children's Center for Heart Disease and the Developing Mind, Heart Institute and  
the Division of Behavioral Medicine & Clinical Psychology, Cincinnati Children's Hospital  
Medical Center, Cincinnati, OH, United States.

<sup>10</sup>Department of Pediatrics, University of Cincinnati, Cincinnati, OH, United States.

<sup>11</sup>Centre for Marine Science and Innovation, School of Biological, Earth and Environmental Sciences, University of New South Wales, Sydney NSW, Australia.

<sup>12</sup>Department of Nutrition and Dietetics, Sydney Children's Hospital, Sydney, Australia.

<sup>13</sup>Department of Gastroenterology, Sydney Children's Hospital, High Street, Randwick NSW, Australia.

\*Correspondence to Associate Professor Chee Y. (Keith) Ooi; [keith.ooi@unsw.edu.au](mailto:keith.ooi@unsw.edu.au)

### **Keywords**

Child; Chronic Disease; Diet Surveys; Microbiome, Human; Quality of Life.

### **Word Count**

3,769

**Study Start Date:** April 18, 2018

**Estimated Study End Date:** March 23, 2023



## ABSTRACT

### Introduction

Chronic gastrointestinal and respiratory conditions of childhood can have long-lasting physical, psychosocial, and economic effects on children and their families. Alterations in diet and intestinal and respiratory microbiomes may have important implications for physical and psychosocial health. Diet influences the intestinal microbiome and should be considered when exploring disease-specific alterations. The concepts of gut-brain and gut-lung axes provide novel perspectives for examining chronic childhood disease(s). We established the “Evaluating the Alimentary and Respiratory Tracts in Health and disease” (EARTH) research program to provide a structured, holistic evaluation of children with chronic gastrointestinal and/or respiratory conditions.

### Methods and analysis

The EARTH program provides a framework for a series of prospective, longitudinal, controlled, observational studies (comprised of individual sub-studies), conducted at an Australian tertiary paediatric hospital (the methodology is applicable to other settings). Children with a chronic gastrointestinal and/or respiratory condition will be compared to age and gender matched healthy controls (HC) across a 12-month period. The following will be collected at baseline, 6 and 12 months: (i) stool, (ii) oropharyngeal swab/sputum, (iii) semi-quantitative food frequency questionnaire, (iv) details of disease symptomatology, (v) health-related quality of life, and (vi) psychosocial factors. Data on the intestinal and respiratory microbiomes and diet will be compared between children with a condition and HC. Correlations between dietary intake (energy, macro- and micro-nutrients), intestinal and respiratory microbiomes within each group will be explored. Data on disease

1  
2  
3 symptomatology, quality of life and psychosocial factors will be compared between condition  
4  
5 and HC cohorts.  
6

7  
8 Results will be hypothesis-generating and direct future focused studies. There is future  
9  
10 potential for direct translation into clinical care, as diet is a highly modifiable factor.  
11  
12  
13

### 14 15 **Ethics and dissemination**

16  
17 Ethics approval: Sydney Children's Hospitals Network Human Research Ethics Committee  
18  
19 (HREC/18/SCHN/26). Results will be presented at international conferences and published in  
20  
21 peer-reviewed journals.  
22  
23  
24  
25

### 26 27 **Trial registration**

28  
29 NCT04071314  
30  
31  
32  
33  
34  
35

## 36 37 **ARTICLE SUMMARY**

### 38 39 **Strengths and limitations of this study**

- 40  
41
- 42 • The prospective, longitudinal, controlled, observational design of this research  
43 program provides a structured approach which can be simultaneously applied to  
44 multiple chronic gastrointestinal and/or respiratory conditions of childhood and  
45 utilises a universal control cohort (for age and gender matching).  
46  
47
  - 48 • This study will simultaneously evaluate dietary intake and the intestinal and  
49 respiratory microbiomes, which will tease out disease-causing alterations in the  
50 microbiomes, provide insights into the gut-lung axis and potentially identify  
51 modifiable dietary factors.  
52  
53  
54  
55  
56  
57  
58  
59  
60

- We will explore relationships between the primary outcomes (diet, intestinal and respiratory microbiomes) and health-related quality of life (including symptomatology), which may provide insights into the gut-brain axis and identify novel pathogenic mechanisms in these conditions.
- A limitation of this research program is that it currently includes a single centre, Sydney Children's Hospital Randwick, Australia, however it is a tertiary referral centre for a diverse group of children across the state of New South Wales, Australia.
- A further limitation is the arbitrary sample size targets given the exploratory nature of these studies.

## INTRODUCTION

The primary disease burden in childhood has shifted over the last century from infectious to chronic diseases.<sup>1</sup> Chronic childhood diseases, encompassing a wide spectrum of conditions with different pathogeneses, may have long-lasting physical, psychosocial, and economic effects on children and their families.<sup>2</sup> <sup>3</sup>The human microbiome is a collection of all microorganisms (bacteria, viruses, archaea and eukaryotes) living in association with the human body.<sup>4</sup> Our understanding of the human microbiomes in health and disease has begun to develop due to the advent of high-throughput sequencing and mass-spectrometry technologies, with the gut emerging as an ecosystem of particular interest. While the effects of an altered gut microbiome (dysbiosis) may not apply to all chronic diseases, there are conditions, disease-related complications and co-morbidities linked to gut microbial dysbiosis. This is especially true in chronic gastrointestinal and respiratory conditions. Affected children are at risk of an imbalanced diet as well as mental health difficulties, which in turn can influence eating behaviours, attitudes and nutritional intake.<sup>5,6</sup> Some of these conditions also require lifelong dietary modifications; for example, cystic fibrosis (CF).<sup>7</sup> Additionally, the complex interaction between microbiota (i.e. bacteria), available nutrients and the immune system is essential in maintaining homeostasis and fighting against invading pathogens at mucosal sites.<sup>8</sup> An important limitation common to most current publications on the human intestinal microbiome in chronic childhood disease(s) is the lack of quantifiable dietary data, as the diet has a marked influence on gut microbiota in health.<sup>9</sup>

The principles and framework of this research program were developed to be applicable to many chronic gastrointestinal and/or respiratory conditions of childhood. Due to the clinical and/or research expertise of the authors and for the purposes of this manuscript, we will describe this program based on three relevant chronic diseases: (i) CF, (ii) obstructive sleep

1  
2  
3 apnoea (OSA), and Hirschsprung's disease (HSCR). These conditions all have reported or  
4 expected changes in their intestinal and/or respiratory microbiomes.  
5  
6  
7  
8  
9

10 CF is the most common life-shortening recessive disease in Caucasians.<sup>10</sup> It is characterised  
11 by intestinal malabsorption, impaired growth and nutrition, and lung disease.<sup>11</sup> In CF, a high  
12 calorie, high fat diet (110-200% of recommended daily energy intake) is advised to prevent  
13 malnutrition and optimise growth.<sup>7</sup> Recent reports suggest that children tend to achieve the  
14 recommended CF diet primarily by overconsumption of energy-dense, nutrient-poor foods  
15 rather than nutrient-dense foods.<sup>12</sup> We have previously reported that children with CF, from  
16 as early as infancy, have alterations in their gut microbiota, impaired innate immunity and  
17 intestinal inflammation.<sup>13-17</sup> We have also observed that poor growth in children with CF  
18 is significantly correlated with the degree of intestinal inflammation.<sup>14</sup> The aetiology of gut  
19 microbial dysbiosis and inflammation in CF remains unclear. It is plausible that dietary  
20 intake plays a role, as enteric fat abundance (from a high-fat diet) may select for a pro-  
21 inflammatory microbiota.<sup>18,19</sup> Alterations in intestinal metabolomic<sup>20</sup> and proteomic<sup>21</sup> profiles  
22 have also been reported. As the life expectancy of CF patients improves, age-related diseases  
23 such as gastrointestinal malignancies and cardiovascular disease (e.g. myocardial infarcts in  
24 adults with CF) are a growing concern.<sup>22</sup> Thus, optimal strategies to optimise health and  
25 reduce disease risk factors need to be determined.  
26  
27  
28  
29  
30  
31  
32  
33  
34  
35  
36  
37  
38  
39  
40  
41  
42  
43  
44  
45  
46  
47  
48

49 In children, OSA can have cardiovascular, neurocognitive and behavioural consequences.<sup>23</sup>  
50 Murine studies suggest intermittent hypoxia, hypercapnia and sleep fragmentation promote  
51 intestinal dysbiosis, increased visceral fat mass, systemic inflammation and atherosclerosis.<sup>24-</sup>  
52  
53  
54  
55  
56  
57  
58  
59  
60  
27 Additionally, the inhibition of gut microbial metabolites attenuating atherosclerosis<sup>26</sup> and  
replication of hypertension after faecal transplant from hypertensive to normotensive OSA

1  
2  
3 rats<sup>28</sup>suggest the possibility of influencing clinical outcomes through affecting the gut  
4 microbiome. In adult studies, OSA is associated with gut epithelial damage,<sup>29</sup>and nasal  
5  
6 dysbiosis and inflammation.<sup>30</sup>  
7  
8  
9

10  
11  
12 HSCR is a congenital disorder where the distal intestine is aganglionic for a variable length.  
13  
14 This results in a functional bowel obstruction that usually presents in newborns. Following  
15  
16 corrective surgery, children often have ongoing intestinal symptoms, and Hirschsprung-  
17  
18 associated enterocolitis (HAEC) remains the most frequent complication. This may result in  
19  
20 frequent hospitalisations and even mortality. Children with and without HAEC often have an  
21  
22 altered intestinal microbiome<sup>31</sup> and altered composition of short chain fatty acids (SCFA).<sup>32</sup>  
23  
24  
25  
26  
27

28  
29 To the best of our knowledge, there are no publications on the intestinal virome (i.e. viruses)  
30  
31 in children with CF, OSA or HSCR. Bacteriophages (viruses which infect bacteria) can  
32  
33 influence bacterial populations via host lysis and horizontal gene transfer, as well as  
34  
35 indirectly regulate immune function and inflammation.<sup>33-36</sup>  
36  
37  
38  
39

40  
41 Despite accumulating evidence linking health, diet and the microbiomes, there is a paucity of  
42  
43 research exploring this simultaneously in the context of chronic paediatric  
44  
45 disease.<sup>37</sup>Furthermore, potential gut-brain<sup>38</sup> and gut-lung<sup>39</sup> axes have yet to be well  
46  
47 characterised in these conditions. The gut-brain-axis refers to the bi-directional  
48  
49 communication between the central nervous systems and gut microbiome, and is mediated by  
50  
51 neural, endocrine and immune pathways.<sup>40</sup> The gut-lung axis refers to the bi-directional  
52  
53 relationship between the gut and lungs, as there appears to be an immunological relationship  
54  
55 between them.<sup>39</sup> <sup>41</sup>Simultaneous, longitudinal studies using an integrated “omics” approach  
56  
57 will help to identify the functional consequences and pathogenic mechanisms that occur  
58  
59  
60

1  
2  
3 within the altered intestinal and respiratory milieu in chronic conditions. By exploring disease  
4 mechanisms and environmental interactions (e.g. diet) we may in turn develop insights into  
5 potential therapeutic strategies. Additionally, we may be able to identify whether diet may be  
6 amenable to specific modifications which may in turn benefit the intestinal microbiome.  
7  
8  
9  
10  
11  
12  
13

14 The EARTH Program has been established to provide a structured approach to analysing the  
15 gastrointestinal and respiratory microbiomes and diet in children with a chronic  
16 gastrointestinal and/or respiratory condition. The design improves efficiency by recruiting  
17 and assessing a healthy control (HC) group which can be used for comparison against each of  
18 the conditions (as opposed to recruiting a new HC group for each condition). Although our  
19 initial design is focused on CF, OSA and HSCR, the program framework is applicable to  
20 other chronic gastrointestinal and/or respiratory conditions of childhood.  
21  
22  
23  
24  
25  
26  
27  
28  
29  
30  
31  
32

## 33 **OBJECTIVES**

34  
35 The objective of this research program is to evaluate and compare children with a chronic  
36 gastrointestinal and/or respiratory condition and age and gender matched HC. The primary  
37 objectives include analysing the intestinal and respiratory microbiomes (using an integrated  
38 “omics” approach) and dietary intake using validated, parent-report tools (Table 1). The  
39 secondary objectives are also presented in Table 1 and include evaluating:  
40  
41  
42  
43  
44  
45  
46

- 47 1. Known inflammatory biomarkers.
  - 48 2. Symptomatology and health-related quality of life (HRQOL) using validated  
49 measures.
  - 50 3. Phenotypic and clinical information.
  - 51 4. Sociodemographic factors
- 52  
53  
54  
55  
56  
57  
58  
59  
60

1  
2  
3 Additional secondary objectives include correlating within children with the same condition:  
4

5 (i) dietary intake with the intestinal microbiome; (ii) dietary intake with the respiratory  
6 microbiome; and (iii) the intestinal and respiratory microbiomes.  
7  
8  
9

10  
11  
12 We hypothesise that:  
13

- 14 (i) Children with chronic gastrointestinal and/or respiratory conditions will have  
15 altered intestinal and respiratory microbiomes compared to healthy children, and  
16  
17 (ii) Diet plays a key role in influencing the intestinal and respiratory microbiomes and  
18 this may impact on clinical outcomes, biomarkers of disease, and health-related  
19 quality of life.  
20  
21  
22  
23  
24  
25  
26  
27  
28

29 To our knowledge, this program will enable the first series of studies comparing the intestinal  
30 and respiratory microbiomes and diet in children with chronic gastrointestinal and/or  
31 respiratory conditions. Initial results will be hypothesis-generating and used to direct future  
32 studies tailored to a specific focus or line of inquiry. Additionally, studies from this research  
33 program have potential for direct translation into clinical care as diet is a highly modifiable  
34 factor.  
35  
36  
37  
38  
39  
40  
41  
42  
43  
44  
45  
46  
47  
48  
49  
50  
51  
52  
53  
54  
55  
56  
57  
58  
59  
60



1  
2  
3  
4  
5  
6  
7  
8  
9  
10  
11  
12  
13  
14  
15  
16  
17  
18  
19  
20  
21  
22  
23  
24  
25  
26  
27  
28  
29  
30  
31  
32  
33  
34  
35  
36  
37  
38  
39  
40  
41  
42  
43  
44  
45  
46

| Domain                                                    | Data Source                                                                 | Technique                                                  | Outcome Measures                                                         | Between Group Analyses*                                                  | Within Group Analyses†                                                                                                                                     |
|-----------------------------------------------------------|-----------------------------------------------------------------------------|------------------------------------------------------------|--------------------------------------------------------------------------|--------------------------------------------------------------------------|------------------------------------------------------------------------------------------------------------------------------------------------------------|
| <b>Primary Objectives</b>                                 |                                                                             |                                                            |                                                                          |                                                                          |                                                                                                                                                            |
| 1. Intestinal Microbiome<br><br>2. Respiratory Microbiome | 1. Stool sample                                                             | Bacterial communities (16S rRNA (V4) <sup>13</sup> or MSS) | Alpha diversity (richness and Shannon index)                             | Student <i>t</i> -test or Wilcoxon signed-rank test                      | Pearson or Spearman correlations with:<br>• Gastrointestinal microbiome<br>• Respiratory microbiome<br>• Diet<br>• Secondary objectives<br><br>Descriptive |
|                                                           |                                                                             |                                                            | Beta diversity (UNIFRAC distances <sup>42</sup> )                        | PERMANOVA <sup>43</sup>                                                  |                                                                                                                                                            |
|                                                           |                                                                             |                                                            | Relative abundances of bacteria                                          | ANCOM <sup>44</sup>                                                      |                                                                                                                                                            |
|                                                           |                                                                             | Viral communities (metagenomic sequencing <sup>45</sup> )  | Alpha diversity (richness and Shannon index)                             | Student <i>t</i> -test or Wilcoxon signed-rank test                      |                                                                                                                                                            |
|                                                           |                                                                             |                                                            | Beta diversity (Bray-Curtis dissimilarities)                             | PERMANOVA <sup>43</sup>                                                  |                                                                                                                                                            |
|                                                           |                                                                             |                                                            | Relative abundances of viruses                                           | ANCOM <sup>44</sup>                                                      |                                                                                                                                                            |
|                                                           | 2. Oropharyngeal swab or sputum sample                                      | Proteomics (LC-MS <sup>21</sup> )                          | Protein z-score normalised LFQ intensities                               | Student <i>t</i> -test                                                   |                                                                                                                                                            |
|                                                           |                                                                             |                                                            | Pathway/network upregulation or downregulation                           | Condition/HC ratio                                                       |                                                                                                                                                            |
|                                                           |                                                                             | Metabolomics (UHPLC-MS/MS <sup>20</sup> )                  | Metabolite normalised abundance                                          | Student <i>t</i> -test                                                   |                                                                                                                                                            |
|                                                           |                                                                             |                                                            | Pathway/network upregulation or downregulation                           | Condition/HC ratio                                                       |                                                                                                                                                            |
| 3. Diet                                                   | i. ACAES (ages 2 to 18yr)<br><br>ii. 24-hour food recall (ages 0 up to 2yr) | Energy intake                                              | Student <i>t</i> -test, Wilcoxon signed-rank test or Fisher's Exact Test |                                                                          |                                                                                                                                                            |
|                                                           |                                                                             | Percent energy from core foods                             |                                                                          |                                                                          |                                                                                                                                                            |
|                                                           |                                                                             | Macronutrient intake                                       |                                                                          |                                                                          |                                                                                                                                                            |
|                                                           |                                                                             | Micronutrient intake                                       |                                                                          |                                                                          |                                                                                                                                                            |
|                                                           |                                                                             | Diet quality score <sup>‡</sup>                            |                                                                          |                                                                          |                                                                                                                                                            |
| <b>Secondary Objectives</b>                               |                                                                             |                                                            |                                                                          |                                                                          |                                                                                                                                                            |
| 1. Biomarkers                                             | Stool, oropharyngeal swab or sputum sample                                  | ELISA                                                      | Inflammation (calprotectin, M2-PK, CRP & interleukins)                   | Student <i>t</i> -test, Wilcoxon signed-rank test or Fisher's Exact Test | Descriptive                                                                                                                                                |

|                                      |                                                                                          |                                                                                                      |                                                                          |             |
|--------------------------------------|------------------------------------------------------------------------------------------|------------------------------------------------------------------------------------------------------|--------------------------------------------------------------------------|-------------|
| 2. Symptomatology & HRQOL            | PedsQL InfantScales (0-2yr) & Gastrointestinal Symptoms Module (2-18yr) <sup>46-48</sup> | HRQOL and gastrointestinal symptoms.                                                                 | Student <i>t</i> -test, Wilcoxon signed-rank test or Fisher's Exact Test | Descriptive |
|                                      | Rome IV Questionnaire <sup>49 50</sup>                                                   | Gastrointestinal symptoms                                                                            |                                                                          |             |
|                                      | Spence Children's Anxiety Scale <sup>51 52</sup>                                         | Anxiety symptoms                                                                                     |                                                                          |             |
|                                      | Short Mood and Feelings Questionnaires <sup>53 54</sup>                                  | Depressive symptoms                                                                                  |                                                                          |             |
| 3. Phenotypic & Clinical Information | Anthropometrics                                                                          | Z-scores; weight, length/height, weight-for-length (ages 0 to 2yr) and BMI (ages 2 to 20yr)          | Student <i>t</i> -test, Wilcoxon signed-rank test or Fisher's Exact Test | Descriptive |
|                                      | Clinical presentations                                                                   | Number and length of hospitalisations, emergency department presentations, medications, vaccinations |                                                                          |             |
|                                      | Results                                                                                  | Biochemistry, microbiology and imaging results                                                       |                                                                          |             |
|                                      | Perinatal factors                                                                        | Mode of delivery, feeding during infancy                                                             |                                                                          |             |
| 4. Socio-demographic factors         | Ethnicity                                                                                | Descriptive                                                                                          | Descriptive                                                              | Descriptive |
|                                      | SEIFA Code <sup>55</sup>                                                                 | Descriptive                                                                                          | Descriptive                                                              | Descriptive |

**Table 1.** Primary and secondary objectives with related outcome measures. All samples, questionnaires and data will be collected from all participants at each time-point. \*Between group analyses describe comparisons between a condition and healthy control groups. †Within group analyses describe analyses of two outcome measures within subjects of the same condition group. ‡ACAES only. ACAES, Australian Child and Adolescent Eating Survey; CRP, C-reactive protein; ELISA, enzyme-linked immunosorbent assay; HC, healthy control; LC-MS, liquid chromatography-mass spectrometry; HRQOL, health-related quality of life; MSS, metagenomic shotgun sequencing; M2-PK, M2 pyruvate kinase; PERMANOVA, permutational multivariate analysis of variance; SEIFA, Socio-Economic Indexes for Areas (a measure of relative socio-economic advantage and disadvantage in Australia).

## METHODS AND ANALYSES

### Study design

The EARTH program provides a framework for a series of prospective, longitudinal, controlled, observational studies, with each individual study comparing children with a chronic gastrointestinal and/or respiratory condition to HC. A single healthy control group will be used for comparison against all conditions and healthy controls are defined as children who are free of any chronic disease. The standardised methodological approach will also allow for comparisons between different health conditions. The SPIRIT reporting guidelines were used for this protocol.<sup>56</sup>

### Setting

Studies will be carried out at a single centre; the Sydney Children's Hospital (SCH) in Randwick, Australia. SCH is a tertiary paediatric hospital.

### Participants

Children are eligible if they:

- Are aged between 0 and 18 years;
- Have been diagnosed with a chronic gastrointestinal and/or respiratory condition defined by consensus diagnostic criteria; or
- Are free of any chronic health condition (healthy control group); and
- Have a parent(s)/carer(s) who provides informed consent, or are at least 16 years old and provide informed consent.

Ineligibility criteria include:

- Children with more than one concurrent or unrelated chronic disease;
- Inability to comply with study requirements;

- Parent(s)/guardian(s) are unable to speak English or do not have a reading level age of at least 12 years.

Participants with a chronic gastrointestinal and/or respiratory condition will be matched to a HC for gender and age (as closely as possible).

### **Recruitment Strategy**

Participants with chronic gastrointestinal and/or respiratory conditions will be approached at their routine clinic appointments in the outpatient department. Flyers will be placed in the hospital for recruitment of HC. Prior to study participation, detailed written and verbal information will be provided about the content and extent of the study. Written informed consent from the parent/legal guardian of each participant will be required. If the child is deemed Gillick competent,<sup>57</sup> they will be encouraged to sign a specific child assent form. Parents/legal guardians and participants may withdraw consent at any time.

### **Outcome Measures**

The outcomes measures are presented in Table 1. All samples, questionnaires and data will be collected from all participants at each time-point. Presented below is a simplified explanation of each outcome/variable included in the research program.

#### *Primary outcomes/variables*

1. Intestinal microbiome assessed from a stool sample using one or more of:
  - i. Bacterial community analysis (16S rRNA (V4)<sup>13</sup> or metagenomic shotgun sequencing):
    - a. Alpha diversity indices:
      - (i) Richness: the total number of unique species.<sup>58</sup>

- 1  
2  
3 (ii) Shannon index: a measure of both species abundance and  
4 evenness.<sup>59</sup>  
5  
6  
7  
8 b. Beta diversity indices:  
9  
10 (i) UniFrac: a distance metric used to compare biological  
11 communities that incorporates phylogenetic distances between  
12 observed organisms.<sup>42</sup>  
13  
14 (ii) Bray-Curtis dissimilarity: a count metric used to quantify the  
15 compositional dissimilarity between two different sites.<sup>60</sup>  
16  
17  
18 c. Relative abundance: the percent composition of an organism relative to  
19 the total number of organisms in the area.<sup>61</sup>  
20  
21  
22  
23  
24  
25  
26 ii. Viral community analysis(metagenomic sequencing<sup>45</sup>), as above for bacterial  
27 community analysis.  
28  
29  
30  
31 iii. Proteomics (liquid chromatography-mass spectrometry (LC-MS)<sup>21</sup>):  
32  
33 a. Protein z-score normalised label-free quantification (LFQ) intensities.  
34  
35 b. Pathway/network upregulation or downregulation based on the ratio of  
36 condition/HC.  
37  
38  
39  
40 iv. Metabolomics (ultra-highperformance liquid chromatography-tandem mass  
41 spectrometry (UHPLC-MS/MS)<sup>20</sup>):  
42  
43 a. Metabolite normalised abundance.  
44  
45 b. Pathway/network upregulation or downregulation based on the ratio of  
46 condition/HC.  
47  
48  
49  
50  
51 2. Respiratory microbiomeassessed from an oropharyngeal swab or sputum sample,  
52 using one or more of the techniques listed above (1a–d).  
53  
54  
55 i. A sputum sample will be obtained in children able to expectorate and an  
56 oropharyngeal swab will be collected in children unable to expectorate.  
57  
58  
59  
60

- 1  
2  
3 a. Associations with the intestinal microbiome (1) will be used to explore  
4  
5 the gut-lung axis.  
6  
7
- 8 3. Dietary intake assessed using a validated semi-quantitative food frequency  
9  
10 questionnaire (FFQ):  
11  
12 i. For participants aged 0 up to 2 years, a 24-hour food recall:  
13  
14 a. Energy intake, percentage energy from core foods, macronutrient  
15  
16 intake (total intake and proportion of energy intake) and micronutrient  
17  
18 intake (total intake and proportion of energy intake).  
19  
20  
21 ii. For participants aged 2 to 18 years, the Australian Child and Adolescent  
22  
23 Eating Survey (ACAES).<sup>62-65</sup>The ACAES is a validated food frequency  
24  
25 questionnaire (120 items, semi quantitative) used to quantify food and nutrient  
26  
27 intake over the preceding six months, developed and validated for use in  
28  
29 Australian children:  
30  
31 a. Energy intake, percentage energy from core foods, macronutrient  
32  
33 intake (total intake and proportion of energy intake), micronutrient  
34  
35 intake (total intake and proportion of energy intake) and overall diet  
36  
37 quality score.  
38  
39  
40  
41  
42  
43  
44

#### 45 *Secondary outcomes/variables*

- 46  
47 1. Faecal and respiratory inflammatory biomarkers, such as calprotectin, M2 pyruvate  
48  
49 kinase (M2-PK), C-reactive protein (CRP) and interleukins.  
50  
51  
52 2. Symptomatology and health-related quality of life (HRQOL) will be collected directly  
53  
54 from children where age-appropriate measures exist and/or parents using age-  
55  
56 appropriate measures:  
57  
58  
59  
60

- 1
- 2
- 3 a. PedsQL Infant Scales (0-2yr) & Gastrointestinal Symptoms Module (2-
- 4
- 5 18yr)<sup>46-48</sup> (HRQOL and gastrointestinal symptoms).
- 6
- 7
- 8 b. Rome IV Questionnaire<sup>49 50</sup>(gastrointestinal symptoms). Designed to diagnose
- 9
- 10 functional gastrointestinal disorders, which are defined as disorders of the gut-
- 11
- 12 brain interaction in children aged 0 to 18 years. These criteria capture
- 13
- 14 gastrointestinal symptoms which are relevant to motility disturbance, visceral
- 15
- 16 hypersensitivity, altered mucosal and immune function, altered gut bacteria
- 17
- 18 and altered central nervous system processing;
- 19
- 20
- 21 i. Associations with the intestinal microbiome (1) will be used to explore
- 22
- 23 the gut-brain axis.
- 24
- 25
- 26 c. Spence Children's Anxiety Scale<sup>51 52</sup> (anxiety symptoms);
- 27
- 28 i. Associations with the intestinal microbiome (1) will be used to explore
- 29
- 30 the gut-brain axis.
- 31
- 32
- 33 d. Short Mood and Feelings Questionnaires<sup>53 54</sup> (depressive symptoms).
- 34
- 35
- 36 i. Associations with the intestinal microbiome (1) will be used to explore
- 37
- 38 the gut-brain axis.
- 39
- 40 3. Anthropometrics, including z-scores for weight, length/height, weight-for-length (ages
- 41
- 42 0 to 2 years) and body mass index (BMI) (ages 2 to 20 years).
- 43
- 44
- 45 4. Z-scores; weight, length/height, weight-for-length (ages 0 to 2yr) and BMI (ages 2 to
- 46
- 47 20yr)
- 48
- 49 5. Clinical information and biochemical results obtained through routine care, such as
- 50
- 51 number and length of hospitalisations, emergency department presentations, perinatal
- 52
- 53 factors (mode of delivery, feeding type(s) in infancy), medications, vaccination status
- 54
- 55 (including timing of most recent vaccination), biochemistry, microbiology and
- 56
- 57 imaging results;
- 58
- 59
- 60

- 1  
2  
3 6. Sociodemographic factors such as ethnicity and Socio-Economic Indexes for Areas  
4 (SEIFA) code.<sup>55</sup>  
5  
6  
7  
8  
9

## 10 **Procedures**

11 Each participant will be assessed on three occasions over a 12-month period; at study entry, 6-  
12 and 12-month follow-up. At each time-point, the following will be collected:  
13  
14

- 15 • A stool sample;
- 16
- 17 • An oropharyngeal swab or sputum sample (a sputum sample will be obtained in  
18 children able to expectorate and an oropharyngeal swab will be collected in children  
19 unable to expectorate);
- 20
- 21 • Dietary intake measured using the ACAES (2 to 18 years) or 24-hour food recall (0 up  
22 to 2 years);
- 23
- 24 • A secure, password-protected online survey comprising:  
25
  - 26 i. PedsQL Infant Scales (0-2yr) & Gastrointestinal Symptoms Module (2-  
27 18yr),<sup>46-48</sup> tailored to age;
  - 28 ii. Rome IV Questionnaire<sup>49 50</sup> (0 to 18 years);
  - 29 iii. Spence Children's Anxiety Scale<sup>51 52</sup> (3 to 18 years);
  - 30 iv. Short Mood and Feelings Questionnaires<sup>53 54</sup> (6 to 18 years);
  - 31 v. Clinical and biochemical results obtained through routine care and  
32 hospitalisations (if available);
  - 33 vi. Sociodemographic factors (baseline survey only);
- 34
- 35 • Anthropometrics: height, weight and BMI z-scores.  
36  
37  
38  
39  
40  
41  
42  
43  
44  
45  
46  
47  
48  
49  
50  
51  
52  
53  
54  
55

56 *Details regarding sample and data collection*  
57  
58  
59  
60



1  
2  
3 Stool samples will be collected in a sterile specimen jar using a Feces Catcher (Abbexa Ltd,  
4 Cambridge, UK). Sputum samples will be collected from children who are able to  
5 expectorate and oropharyngeal swabs will be collected in those children who cannot  
6 expectorate sputum. All samples will be transported in a cooler bag (with a -18°C ice pack) to  
7 the hospital laboratory within 24 hours of collection. Stool, oropharyngeal swab and sputum  
8 samples will be aliquoted and stored at -80 °C. Where practical, samples will be collected at  
9 least four weeks after completion of oral/intravenous antibiotic therapy (excluding  
10 prophylactic antibiotics) or an acute infectious illness.  
11  
12  
13  
14  
15  
16  
17  
18  
19  
20  
21  
22  
23

24 For children aged 0 up to 2 years, a 24-hour dietary recall will be conducted by a study  
25 dietician. For children aged 2 to 18 years, the ACAES will be completed online by  
26 parents/guardians or by the child themselves if aged over 14 years.  
27  
28  
29  
30  
31  
32

33 Participant clinical information and questionnaires will be collected using the Qualtrics  
34 Online Survey Software Tool ([www.qualtrics.com](http://www.qualtrics.com)), which is distributed via a secure email  
35 link. Qualtrics is a secure, password-protected platform, which allows for the distribution of  
36 electronic surveys and collection of data. The surveys are programmed to be  
37 condition/control-specific and facilitate a personalised flow depending on the time-point of  
38 the study and the age of the participant (to facilitate administration of age-appropriate  
39 questionnaires). Further details on each of the measures used for evaluating symptomatology  
40 and HRQOL are presented in Table 2. Clinical and biochemical results will be obtained via  
41 the SCH electronic medical record system and recorded in a Qualtrics survey.  
42  
43  
44  
45  
46  
47  
48  
49  
50  
51  
52  
53

54  
55  
56 Participants will be measured for their height and weight using standardised methods.  
57  
58  
59  
60

| Measure                                                                                                             | Domains (Items)                                                                                                                                                                                                                                                                                                                                                            | Scoring                                                                     | Interpretation                         |
|---------------------------------------------------------------------------------------------------------------------|----------------------------------------------------------------------------------------------------------------------------------------------------------------------------------------------------------------------------------------------------------------------------------------------------------------------------------------------------------------------------|-----------------------------------------------------------------------------|----------------------------------------|
| <b><i>i. PedsQL</i></b>                                                                                             |                                                                                                                                                                                                                                                                                                                                                                            |                                                                             |                                        |
| Infant Scales - Parent report for infants (ages 1-12 months) <sup>48</sup>                                          | Total (36): 5-point LS. Physical Functioning (6), Physical Symptoms (10), Emotional Functioning (12), Social Functioning (4), Cognitive Functioning (4).                                                                                                                                                                                                                   | Items are reverse scored and linearly transformed on a scale from 0 to 100. | Higher scores indicate better HRQOL    |
| Infant Scales - Parent report for infants (ages 13-24 months) <sup>48</sup>                                         | Total (45): 5-point LS. Physical Functioning (9), Physical Symptoms (10), Emotional Functioning (12), Social Functioning (5), Cognitive Functioning (9).                                                                                                                                                                                                                   | Items are reverse scored and linearly transformed on a scale from 0 to 100. | Higher scores indicate better HRQOL    |
| 3.0 Gastrointestinal Symptoms Module – Parent report for toddlers (ages 2-4) <sup>46 47</sup>                       | Total (74): 5-point LS. Stomach Pain and Hurt (6), Stomach Discomfort When Eating (5), Food and Drink Limits (6), Trouble Swallowing (3), Heart Burn and Reflux (4), Nausea and Vomiting (4), Gas and Bloating (7), Constipation (14), Blood in Poop (2), Diarrhoea (7), Worry About Going Poop (5), Worry About Stomach Aches (2), Medicines (4), Communication (5).      | Items are reverse scored and linearly transformed on a scale from 0 to 100. | Higher scores indicate lower problems. |
| Gastrointestinal symptoms module (Acute Version 3.0) – Parent report for young children (ages 5-7) <sup>46 47</sup> | Total (74): 3- & 5-point LS. Stomach Pain and Hurt (6), Stomach Discomfort When Eating (5), Food and Drink Limits (6), Trouble Swallowing (3), Heart Burn and Reflux (4), Nausea and Vomiting (4), Gas and Bloating (7), Constipation (14), Blood in Poop (2), Diarrhoea (7), Worry About Going Poop (5), Worry About Stomach Aches (2), Medicines (4), Communication (5). | Items are reverse scored and linearly transformed on a scale from 0 to 100. | Higher scores indicate lower problems. |
| Gastrointestinal symptoms module (Acute Version 3.0) – Young child report (ages 5-7) <sup>46 47</sup>               | Total (74): 3- & 5-point LS. Stomach Pain and Hurt (6), Stomach Discomfort When Eating (5), Food and Drink Limits (6), Trouble Swallowing (3), Heart Burn and Reflux (4),                                                                                                                                                                                                  | Items are reverse scored and linearly transformed on a scale from 0 to 100. | Higher scores indicate lower problems. |

|                                                                                                              |                                                                                                                                                                                                                                     |                                                                                                                                                                                                                                                                                                                                                                                                              |                                                                                                  |
|--------------------------------------------------------------------------------------------------------------|-------------------------------------------------------------------------------------------------------------------------------------------------------------------------------------------------------------------------------------|--------------------------------------------------------------------------------------------------------------------------------------------------------------------------------------------------------------------------------------------------------------------------------------------------------------------------------------------------------------------------------------------------------------|--------------------------------------------------------------------------------------------------|
| 8-12) <sup>46 47</sup>                                                                                       | Nausea and Vomiting (4), Gas and Bloating (7), Constipation (14), Blood in Poop (Bowel Movement) (2), Diarrhoea (7), Worry About Going Poop (Bowel Movements) (5), Worry About Stomach Aches (2), Medicines (4), Communication (5). |                                                                                                                                                                                                                                                                                                                                                                                                              |                                                                                                  |
| Gastrointestinal symptoms module (Acute Version 3.0) – Child report (ages 8-12) <sup>46 47</sup>             |                                                                                                                                                                                                                                     |                                                                                                                                                                                                                                                                                                                                                                                                              |                                                                                                  |
| Gastrointestinal symptoms module (Acute Version 3.0) – Parent report for teens (ages 13-18) <sup>46 47</sup> |                                                                                                                                                                                                                                     |                                                                                                                                                                                                                                                                                                                                                                                                              |                                                                                                  |
| Gastrointestinal symptoms module (Acute Version 3.0) – Teens report (ages 13-18) <sup>46 47</sup>            |                                                                                                                                                                                                                                     |                                                                                                                                                                                                                                                                                                                                                                                                              |                                                                                                  |
| <b>ii. Rome IV</b>                                                                                           |                                                                                                                                                                                                                                     |                                                                                                                                                                                                                                                                                                                                                                                                              |                                                                                                  |
| Rome IV – Parent-Report Form for Infants and Toddlers (ages 0-3) (R49QG-toddler) <sup>49</sup>               | Total (29 for ages 0-12 months; 18 for ages 1-3 years):<br>Infant gastrointestinal problems (11), Vomiting (9), Bowel Movements (9)                                                                                                 | Defined diagnostic criteria for functional gastrointestinal disorders in neonates and toddlers: <sup>49</sup><br>Infant regurgitation, Infant rumination syndrome, Cyclic vomiting syndrome, Infant colic, Functional diarrhoea, Infant dyschezia, Functional constipation.                                                                                                                                  |                                                                                                  |
| Parent-Report Form for Children and Adolescents (4 years of age and older) (R4PDQ-child) <sup>50</sup>       | Total (42):<br>Belly ache and uncomfortable feelings above the belly button (12), Belly aches and abdominal pain around and below the belly button (10), Bowel movements (7), Nausea and vomiting (9), Other symptoms (4).          | Defined diagnostic criteria for functional gastrointestinal disorders in children and adolescents: <sup>50</sup><br>Cyclic vomiting syndrome, Functional nausea and functional vomiting, Rumination syndrome, Aerophagia, Functional dyspepsia, Irritable bowel syndrome, Abdominal migraine, Functional abdominal pain – not otherwise specified, Functional Constipation, Nonretentive fecal incontinence. |                                                                                                  |
| Self-Report Form for Children and Adolescents (10 years of age and older) (R4PDQ-child) <sup>50</sup>        |                                                                                                                                                                                                                                     |                                                                                                                                                                                                                                                                                                                                                                                                              |                                                                                                  |
| <b>iii. Spence Children's Anxiety Scale</b>                                                                  |                                                                                                                                                                                                                                     |                                                                                                                                                                                                                                                                                                                                                                                                              |                                                                                                  |
| Spence – Preschool Anxiety Scale (Parent Report) (ages 0 to 4) <sup>51 52</sup>                              | Total (34): 5-point LS.<br>Generalized anxiety (5), Social anxiety (6), Obsessive compulsive disorder (5), Physical injury                                                                                                          | Responses are scored 0 (Not true at all) to 4 (very often true). A                                                                                                                                                                                                                                                                                                                                           | A score 1 SD above mean for a subscale or total score warrants further clinical investigation. A |

|                                                                                                         |                                                                                                                                                                                                                                     |                                                                                                     |                                                                                                                                                                                     |
|---------------------------------------------------------------------------------------------------------|-------------------------------------------------------------------------------------------------------------------------------------------------------------------------------------------------------------------------------------|-----------------------------------------------------------------------------------------------------|-------------------------------------------------------------------------------------------------------------------------------------------------------------------------------------|
|                                                                                                         | fears (7), Separation anxiety (5).                                                                                                                                                                                                  | maximum possible score of 112.                                                                      | score of 0.5 SD above the mean on total score is indicative of an elevated, but not clinical level of anxiety.                                                                      |
| Spence Children's Anxiety Scale (Parent Report) (5 years and older) <sup>51 52</sup>                    | Total (38 scored, 39 total): 4-point LS. Panic attack and agoraphobia (9), Separation anxiety (6), Physical injury fears (5), Social phobia (6), Obsessive compulsive (6), Generalized anxiety disorder / overanxious disorder (6). | Responses are scored 0 (Never) to 3 (Always). A maximum possible score of 114. T-score calculation. | A score 1 SD above mean (T-score of $\geq 60$ ) for a subscale or total score is indicative of subclinical or elevated levels of anxiety warranting further clinical investigation. |
| Spence Children's Anxiety Scale (8 years and older) <sup>51 52</sup>                                    | Total (38 scores, 45 total): 4-point LS. Separation anxiety (6), Social phobia (6), Obsessive compulsive (6), Panic attack and agoraphobia (9), Physical injury fears (5), Generalized anxiety (6).                                 |                                                                                                     |                                                                                                                                                                                     |
| <b><i>iv. Short Mood and Feelings Questionnaire</i></b>                                                 |                                                                                                                                                                                                                                     |                                                                                                     |                                                                                                                                                                                     |
| Mood and Feelings Questionnaire: Short Version (Parent Report on Child) (ages 6-18) <sup>53 54 66</sup> | Total (13): 3-point LS. Depressive symptoms (13).                                                                                                                                                                                   | Responses are scored 0 (Not true) to 2 (True). A maximum possible score of 26.                      | Higher scores suggest more severe depressive symptoms. A score of $\geq 12$ may indicate the presence of depression in the respondent.                                              |
| Mood and Feelings Questionnaire: Short Version (Child Self-Report) (ages 6-18) <sup>53 54 66</sup>      | Total (13): 3-point LS. Depressive symptoms (13).                                                                                                                                                                                   |                                                                                                     |                                                                                                                                                                                     |

**Table 2.** Measures for symptomatology and health-related quality of life (HRQOL). All questionnaires will be collected from all participants at each time-point. LS, Likert scale; SD, standard deviation. N.B. Disease-specific questionnaires can be added into the Qualtrics data collection form i.e. the Paediatric Sleep Questionnaire: Sleep-Disordered Breathing Subscale,<sup>67</sup> for children with OSA.

### *Sample and data processing techniques*

Processing of stool, oropharyngeal swab and sputum samples is almost identical (sparing a few initial sample preparation steps). For bacterial community analysis, DNA will be extracted using QIAamp DNA kits (QIAGEN, Hildren, Germany) according to manufacturer's instructions. For 16S rRNA gene analysis specifically, amplification will be performed with primers 515F and 806R spanning the V4 region and sequencing data will be processed using USEARCH.<sup>68</sup>

In the instance where species resolution of bacterial communities is thought to be beneficial, metagenomic shotgun sequencing (MSS) will be performed as an alternative to 16S rRNA gene sequencing. For MSS, no amplification step will be performed prior to sequencing. Sequencing data will be processed using a custom in-house pipeline.

For viral community analysis specifically, sample preparation will follow an adjusted NetoVIR (Novel Enrichment Technique Of VIRomes) protocol.<sup>45</sup> All sequencing will be performed using the Illumina MiSeq platform at the Ramaciotti Centre for Genomics at the University of New South Wales (UNSW). Briefly, sequencing data will be processed using the Vipie platform<sup>69</sup> for taxonomic assignment and Virsorter pipeline<sup>70</sup> for functional annotation.

For untargeted proteomics, samples will undergo an adjusted Debyser et al. protocol for protein extraction, gel electrophoresis and analysed using LC-MS/MS at the Bioanalytical Mass Spectrometry Facility (BMSF), UNSW.<sup>21</sup> Briefly, proteomics data will be analysed using MaxQuant<sup>71</sup> and Ingenuity Pathway Analysis (Qiagen).

1  
2  
3 For untargeted metabolomics, metabolites will be extracted in 1:1 (v:v) acetonitrile:H<sub>2</sub>O and  
4 analysed using a U3000 UHPLC system coupled to a Q-Exactive mass spectrometer (MS;  
5 ThermoFisher Scientific) at the BMSF, UNSW. Briefly, metabolomics data will be analysed  
6 using Progenesis COMET (Waters/NonLinear Dynamics).  
7  
8  
9  
10  
11  
12  
13

14 Faecal and respiratory biomarkers (listed above) will be measured using enzyme-linked  
15 immunosorbent assays (ELISA).  
16  
17  
18  
19  
20

21 Nutrient intake data from the ACAES and 24-hour recall is computed using FoodWorks  
22 (Version 3.02.581) and the following databases: Australian AusNut 1999 database (All  
23 Foods) Revision 14 and AusFoods (Brands) Revision 5 (Xyris Software (Australia) Pty Ltd,  
24 FoodWorks Professional Version 3.02.581. 2004: Brisbane Australia). Outputs include a  
25 quantified estimate and the percentage of energy from a wide of range of macro- (protein, fat,  
26 carbohydrate) and micro-nutrients (vitamins A, B, C and minerals such as iron, zinc and  
27 calcium). In addition, overall diet quality score and the percentage of energy derived from  
28 nutrient rich core foods and energy-dense, nutrient-poor discretionary foods is calculated.  
29  
30  
31  
32  
33  
34  
35  
36  
37  
38  
39  
40  
41

#### 42 *Administration of patient records and data*

43  
44 At the time of consent and enrolment, participants will be assigned a unique study ID number  
45 (9 alphanumeric characters). All patient records, samples and data are deidentified using the  
46 unique study ID. Data will be stored securely as per ethics review board guidelines.  
47  
48  
49  
50  
51  
52

#### 53 *Handling of abnormal outcomes or distress*

54 The well-being of participants is of utmost importance. Participants and their  
55 parents/guardians will be advised to contact any of the study investigators if they have  
56  
57  
58  
59  
60

1  
2  
3 concerns regarding any aspects of their participation. It is possible that thinking about  
4 one's health or the health of one's child may elicit emotional distress in some participants.  
5  
6 Depending on the nature of the concern or level of distress communicated, a relevant study  
7  
8 investigator will contact the participant and/or his or her primary caregiver by telephone or  
9  
10 in-person to assess any concerns and arrange appropriate follow-up or referral as soon as  
11  
12 possible. Additionally, all Participant Information Sheets will provide the details for several,  
13  
14 free, age-appropriate 24-hour telephone-based support services. All individuals will be  
15  
16 clearly informed that choosing not to take part in the study, or withdrawing from the study at  
17  
18 any stage, will not adversely affect their or their child's health care or relationship with  
19  
20 hospital staff in any way.  
21  
22  
23  
24  
25  
26  
27

### 28 **Bias, confounding factors and handling of missing data**

29  
30 The single-centre nature of this study is a limitation due to the restricted recruitment pool  
31  
32 available and potential for selection bias; however, SCH is a tertiary referral centre for a  
33  
34 diverse group of children across the state of New South Wales, which is the most populous  
35  
36 state in Australia. Age and gender are known confounding factors for microbiome analyses  
37  
38 and are controlled for with matching. There are rapid changes in the intestinal microbiota  
39  
40 during the first 3 years of life, after which it becomes relatively stable.<sup>72-74</sup> Although we aim  
41  
42 to match participants as closely as possible, our criteria for acceptable matching is as follows:  
43  
44  
45

- 46 • For children less than one year, age to be matched within 3 months,
- 47
- 48 • For children aged one to three years, age to be matched within 6 months,
- 49
- 50 • For children aged four years and older, age to be matched within 2 years.
- 51

52  
53  
54  
55  
56 Additional confounding factors for microbiome analyses include perinatal factors and  
57  
58 ethnicity, for which sensitivity analyses will be performed. Condition specific medications  
59  
60

1  
2  
3 (e.g. pancreatic enzyme replacement therapy or antibiotic therapy in CF) are potential  
4  
5 confounders and attempts to control for these factors will be made at the analysis stage.  
6  
7 Vaccines may influence short-term cytokine production and analyses as a confounder will be  
8  
9 considered.<sup>75 76</sup> Missing data will be treated as missing and accounted for using linear mixed  
10  
11 models (see statistical methods below).  
12  
13  
14  
15  
16

### 17 **Study size**

18  
19 In an exploratory research program of this nature, with multiple conditions of interest, sample  
20  
21 size calculations for the primary outcomes are difficult. As an initial, arbitrary target,  
22  
23 three males and three females in each of the following age ranges (0 to 5, >5 to 10, >10 to 18  
24  
25 years) will be recruited to account for age- and gender-related changes in microbiomes and  
26  
27 diet. This calculation assumes that six participants will be required for most statistical tests of  
28  
29 interest and an analysis can be performed on the smallest subgroup (e.g. six CF vs. six HC  
30  
31 children aged 0 to 5 years). Therefore 18 participants for each condition and 18 HC (which  
32  
33 can be used for comparison against multiple conditions) are an initial target sample size.  
34  
35 Initial data from this sample size can then be utilised for subsequent power-focused study  
36  
37 designs.  
38  
39  
40  
41  
42  
43  
44

### 45 **Statistical methods**

46  
47 Statistical analyses will be performed in R v3.4.4. All outcome measures will be analysed  
48  
49 cross-sectionally and temporally. Descriptive statistics will be calculated for all outcome  
50  
51 parameters for each cohort according to normality of distribution. Given the sample size,  
52  
53 categorical variables will be compared using Fisher's Exact Test. Continuous variables will  
54  
55 be analysed according to distribution with a student *t*-test or Wilcoxon signed-rank test for  
56  
57 parametric and non-parametric data, respectively. A linear random-effects mixed model or  
58  
59  
60



1  
2  
3 variant of generalised linear-mixed model will be utilised to evaluate cross-sectional and  
4 temporal differences in outcome measures. This technique will allow for control of  
5 confounders and treatment of missing data as missing. Correlations between two continuous  
6 variables will be performed using Pearson or Spearman correlations according to distribution.  
7  
8 Alpha diversity indices will be measured by richness (number of taxa) and Shannon index.  
9  
10 Phylogeny- and taxonomy-based beta diversity will be calculated using UNIFRAC  
11 distances<sup>42</sup> and Bray-Curtis dissimilarities, respectively, and used to generate non-metric  
12 multidimensional scaling (NMDS) plots. Permutational multivariate analysis of variance  
13 (PERMANOVA) tests (permutations = 1000) will be utilised to test if beta diversity  
14 significantly differs between groups and age using the vegan function `adonis`.<sup>43</sup> A significant  
15 difference in abundance of taxa, proteins or metabolites between groups will be assessed  
16 using the ANCOM package v1.1-3.<sup>44</sup> For all analyses,  $p < 0.05$  (two-tailed) is considered  
17 significant except in the instance of multiple comparisons, in which case a Benjamini &  
18 Hochberg correction will be applied and  $q < 0.05$  will be considered significant.  
19  
20  
21  
22  
23  
24  
25  
26  
27  
28  
29  
30  
31  
32  
33  
34  
35  
36  
37  
38

## 39 **ETHICS AND DISSEMINATION**

40  
41 The EARTH Research Program received ethics approval from the Sydney Children's  
42 Hospitals Network Human Research Ethics Committee (HREC/18/SCHN/26). Any  
43 amendment to the protocol which may impact the conduct of the study will be approved by  
44 the ethics committee before implementation.  
45  
46  
47  
48  
49  
50  
51  
52

53 The results of studies from this research program will be presented in international  
54 conferences and will be published in peer-reviewed journals. Findings may also be presented  
55 as: (i) easy-to-read summaries for participants and the community; (ii) educational lectures  
56 and seminars for patients, families and the community; (iii) website and social media  
57  
58  
59  
60

1  
2  
3 postings; (iv) newsletter updates for study participants; (v) reports for relevant advocacy  
4  
5 groups and funding partners.  
6  
7  
8  
9

## 10 11 **EXPECTED OUTCOMES AND SIGNIFICANCE OF THE RESEARCH** 12 13 14 **PROJECT**

15  
16 To our knowledge the EARTH Research Program will be the first in children with a chronic  
17  
18 gastrointestinal and/or respiratory condition to simultaneously evaluate dietary intake and the  
19  
20 intestinal and respiratory microbiomes. By exploring disease mechanisms and environmental  
21  
22 interactions (i.e. diet) we may in turn develop insights into potential therapeutic  
23  
24 strategies. Studies from this program have the potential for direct translation into clinical care  
25  
26 as diet is a highly modifiable factor. This program also provides a structured approach for  
27  
28 performing prospective, longitudinal, controlled, observational studies which can be  
29  
30 simultaneously applied to multiple health conditions, and utilised a universal control cohort.  
31  
32  
33  
34  
35  
36

### 37 **Acknowledgements**

38  
39 The authors thank the future parents and families of our children at SCH and our healthy  
40  
41 participants. We thank the Westfield Research Lab SCH (Dr Steven Leach), the Ramaciotti  
42  
43 Centre for Genomics, UNSW Sydney, the Bioanalytical Mass Spectrometry Facility, UNSW  
44  
45 Sydney (Dr Ling Zhong, Dr Nadeem Kaakoush and Dr Russell Pickford), the Virology  
46  
47 Research Laboratory at Prince of Wales Hospital, the School of Biological, Earth and  
48  
49 Environmental Sciences (Dr Bernd Wemheuer), and the School of Women's and Children's  
50  
51 Health, Faculty of Medicine, UNSW Sydney (Equipment Grant 2018).  
52  
53  
54  
55  
56  
57  
58  
59  
60

### **Author Contributions**

MJC, TK and CYO jointly conceived and designed the research program. MJC wrote the study protocol. IRM, MD, SC, SA, SSB, SW, NK, TT and AJ refined the research program design. All authors will take part in study conduct, recruitment, data management and/or analysis. MJC, IRM and CYO prepared this manuscript and all authors read and approved the final version.

### **Funding Statement**

This is an investigator-initiated research program. Funding to support medical research students is available through the Independent Learning Project scheme (involves a research term for medical students) at the University of New South Wales Sydney. Additional funding will be sought through seed grants. Dr Coffey is the recipient of the Sydney Children's Hospital Foundation PhD Scholarship and the Australian Government Department of Education and Training Australian Postgraduate Award. A/Prof Kasparian is the recipient of a National Heart Foundation of Australia Future Leader Fellowship (101229), and a 2018-2019 Harkness Fellowship in Health Care Policy and Practice from the Commonwealth Fund.

### **Competing interests**

The authors declare no competing interests.

### **Data Sharing**

De-identified participant data that underlies the results of publications from the EARTH program will be shared with investigators whose proposed use of the data has been approved by an independent review committee.

1  
2  
3  
4  
5 **Patient and Public Involvement**  
6

7  
8 No patient involved.  
9  
10  
11  
12  
13  
14  
15  
16  
17  
18  
19  
20  
21  
22  
23  
24  
25  
26  
27  
28  
29  
30  
31  
32  
33  
34  
35  
36  
37  
38  
39  
40  
41  
42  
43  
44  
45  
46  
47  
48  
49  
50  
51  
52  
53  
54  
55  
56  
57  
58  
59  
60

For peer review only

## REFERENCES

1. Burns KH, Casey PH, Lyle RE, et al. Increasing prevalence of medically complex children in US hospitals. *Pediatrics* 2010;126(4):638-46. doi: 10.1542/peds.2009-1658 [published Online First: 2010/09/22]
2. Satterwhite BB. Impact of chronic illness on child and family: an overview based on five surveys with implications for management. *International journal of rehabilitation research Internationale Zeitschrift für Rehabilitationsforschung Revue internationale de recherches de readaptation* 1978;1(1):7-17. [published Online First: 1978/01/01]
3. Wijlaars LP, Gilbert R, Hardelid P. Chronic conditions in children and young people: learning from administrative data. *Archives of disease in childhood* 2016;101(10):881-5. doi: 10.1136/archdischild-2016-310716 [published Online First: 2016/06/02]
4. Peterson J, Garges S, Giovanni M, et al. The NIH Human Microbiome Project. *Genome research* 2009;19(12):2317-23. doi: 10.1101/gr.096651.109 [published Online First: 2009/10/13]
5. Pinquart M, Shen Y. Depressive symptoms in children and adolescents with chronic physical illness: an updated meta-analysis. *Journal of pediatric psychology* 2011;36(4):375-84. doi: 10.1093/jpepsy/jsq104 [published Online First: 2010/11/23]
6. Conviser JH, Fisher SD, McColley SA. Are children with chronic illnesses requiring dietary therapy at risk for disordered eating or eating disorders? A systematic review. *The International journal of eating disorders* 2018;51(3):187-213. doi: 10.1002/eat.22831 [published Online First: 2018/02/23]
7. Saxby N, Painter C, Kench A, et al. Nutrition Guidelines for Cystic Fibrosis in Australia and New Zealand, ed. Scott C. Bell, Thoracic Society of Australia and New Zealand. Sydney2017.
8. Statovci D, Aguilera M, MacSharry J, et al. The Impact of Western Diet and Nutrients on the Microbiota and Immune Response at Mucosal Interfaces. *Frontiers in immunology* 2017;8:838. doi: 10.3389/fimmu.2017.00838 [published Online First: 2017/08/15]
9. Valdes AM, Walter J, Segal E, et al. Role of the gut microbiota in nutrition and health. *BMJ (Clinical research ed)* 2018;361:k2179. doi: 10.1136/bmj.k2179 [published Online First: 2018/06/15]
10. Farrell PM, Rosenstein BJ, White TB, et al. Guidelines for diagnosis of cystic fibrosis in newborns through older adults: Cystic Fibrosis Foundation consensus report. *The Journal of pediatrics* 2008;153(2):S4-S14. doi: 10.1016/j.jpeds.2008.05.005 [published Online First: 2008/07/22]
11. Massie RJ, Olsen M, Glazner J, et al. Newborn screening for cystic fibrosis in Victoria: 10 years' experience (1989-1998). *The Medical journal of Australia* 2000;172(12):584-7. [published Online First: 2000/07/29]
12. Sutherland R, Katz T, Liu V, et al. Dietary intake of energy-dense, nutrient-poor and nutrient-dense food sources in children with cystic fibrosis. *Journal of cystic fibrosis : official journal of the European Cystic Fibrosis Society* 2018;17(6):804-10. doi: 10.1016/j.jcf.2018.03.011 [published Online First: 2018/05/05]
13. Nielsen S, Needham B, Leach ST, et al. Disrupted progression of the intestinal microbiota with age in children with cystic fibrosis. *Scientific reports* 2016;6:24857. doi: 10.1038/srep24857 [published Online First: 2016/05/05]
14. Dhaliwal J, Leach S, Katz T, et al. Intestinal inflammation and impact on growth in children with cystic fibrosis. *Journal of pediatric gastroenterology and nutrition*

- 2015;60(4):521-6. doi: 10.1097/mpg.0000000000000683 [published Online First: 2014/12/30]
15. Pang T, Leach ST, Katz T, et al. Elevated fecal M2-pyruvate kinase in children with cystic fibrosis: a clue to the increased risk of intestinal malignancy in adulthood? *Journal of gastroenterology and hepatology* 2015;30(5):866-71. doi: 10.1111/jgh.12842 [published Online First: 2014/11/08]
  16. Ooi CY, Pang T, Leach ST, et al. Fecal Human beta-Defensin 2 in Children with Cystic Fibrosis: Is There a Diminished Intestinal Innate Immune Response? *Digestive diseases and sciences* 2015;60(10):2946-52. doi: 10.1007/s10620-015-3842-2 [published Online First: 2015/08/15]
  17. Lee JM, Leach ST, Katz T, et al. Update of faecal markers of inflammation in children with cystic fibrosis. *Mediators of inflammation* 2012;2012:948367. doi: 10.1155/2012/948367 [published Online First: 2012/09/19]
  18. Coffey MJ, Nightingale S, Ooi CY. Predicting a biliary aetiology in paediatric acute pancreatitis. *Archives of disease in childhood* 2013;98(12):965-9. doi: 10.1136/archdischild-2013-304462 [published Online First: 2013/09/10]
  19. Coffey MJ, Nightingale S, Ooi CY. Serum lipase as an early predictor of severity in pediatric acute pancreatitis. *Journal of pediatric gastroenterology and nutrition* 2013;56(6):602-8. doi: 10.1097/MPG.0b013e31828b36d8 [published Online First: 2013/02/14]
  20. Kaakoush NO, Pickford R, Jaffe A, et al. Is there a role for stool metabolomics in cystic fibrosis? *Pediatrics international : official journal of the Japan Pediatric Society* 2016;58(8):808-11. doi: 10.1111/ped.13063 [published Online First: 2016/08/25]
  21. Debyser G, Mesuere B, Clement L, et al. Faecal proteomics: A tool to investigate dysbiosis and inflammation in patients with cystic fibrosis. *Journal of cystic fibrosis : official journal of the European Cystic Fibrosis Society* 2016;15(2):242-50. doi: 10.1016/j.jcf.2015.08.003 [published Online First: 2015/09/04]
  22. Kosorok MR, Zeng L, West SE, et al. Acceleration of lung disease in children with cystic fibrosis after *Pseudomonas aeruginosa* acquisition. *Pediatric pulmonology* 2001;32(4):277-87. [published Online First: 2001/09/25]
  23. Nixon GM, Davey M. Sleep apnoea in the child. *Australian family physician* 2015;44(6):352-5. [published Online First: 2015/07/27]
  24. Moreno-Indias I, Torres M, Montserrat JM, et al. Intermittent hypoxia alters gut microbiota diversity in a mouse model of sleep apnoea. *The European respiratory journal* 2015;45(4):1055-65. doi: 10.1183/09031936.00184314 [published Online First: 2014/12/30]
  25. Poroyko VA, Carreras A, Khalyfa A, et al. Chronic Sleep Disruption Alters Gut Microbiota, Induces Systemic and Adipose Tissue Inflammation and Insulin Resistance in Mice. *Scientific reports* 2016;6:35405. doi: 10.1038/srep35405 [published Online First: 2016/10/16]
  26. Xue J, Zhou D, Poulsen O, et al. Intermittent Hypoxia and Hypercapnia Accelerate Atherosclerosis, Partially via Trimethylamine-Oxide. *American journal of respiratory cell and molecular biology* 2017;57(5):581-88. doi: 10.1165/rcmb.2017-0086OC [published Online First: 2017/07/06]
  27. Tripathi A, Melnik AV, Xue J, et al. Intermittent Hypoxia and Hypercapnia, a Hallmark of Obstructive Sleep Apnea, Alters the Gut Microbiome and Metabolome. *mSystems* 2018;3(3) doi: 10.1128/mSystems.00020-18 [published Online First: 2018/06/14]
  28. Durgan DJ, Ganesh BP, Cope JL, et al. Role of the Gut Microbiome in Obstructive Sleep Apnea-Induced Hypertension. *Hypertension (Dallas, Tex : 1979)* 2016;67(2):469-74. doi: 10.1161/hypertensionaha.115.06672 [published Online First: 2015/12/30]

29. Barcelo A, Esquinas C, Robles J, et al. Gut epithelial barrier markers in patients with obstructive sleep apnea. *Sleep medicine* 2016;26:12-15. doi: 10.1016/j.sleep.2016.01.019 [published Online First: 2016/12/23]
30. Wu BG, Sulaiman I, Wang J, et al. Severe Obstructive Sleep Apnea Is Associated with Alterations in the Nasal Microbiome and an Increase in Inflammation. *American journal of respiratory and critical care medicine* 2019;199(1):99-109. doi: 10.1164/rccm.201801-0119OC [published Online First: 2018/07/04]
31. Frykman PK, Nordenskjold A, Kawaguchi A, et al. Characterization of Bacterial and Fungal Microbiome in Children with Hirschsprung Disease with and without a History of Enterocolitis: A Multicenter Study. *PloS one* 2015;10(4):e0124172. doi: 10.1371/journal.pone.0124172 [published Online First: 2015/04/25]
32. Demehri FR, Frykman PK, Cheng Z, et al. Altered fecal short chain fatty acid composition in children with a history of Hirschsprung-associated enterocolitis. *Journal of pediatric surgery* 2016;51(1):81-6. doi: 10.1016/j.jpedsurg.2015.10.012 [published Online First: 2015/11/13]
33. Barr JJ, Auro R, Furlan M, et al. Bacteriophage adhering to mucus provide a non-host-derived immunity. *Proceedings of the National Academy of Sciences of the United States of America* 2013;110(26):10771-6. doi: 10.1073/pnas.1305923110 [published Online First: 2013/05/22]
34. Zuo T, Lu XJ, Zhang Y, et al. Gut mucosal virome alterations in ulcerative colitis. *Gut* 2019 doi: 10.1136/gutjnl-2018-318131 [published Online First: 2019/03/08]
35. Minot S, Sinha R, Chen J, et al. The human gut virome: inter-individual variation and dynamic response to diet. *Genome research* 2011;21(10):1616-25. doi: 10.1101/gr.122705.111 [published Online First: 2011/09/02]
36. Rodriguez-Brito B, Li L, Wegley L, et al. Viral and microbial community dynamics in four aquatic environments. *The ISME journal* 2010;4(6):739-51. doi: 10.1038/ismej.2010.1 [published Online First: 2010/02/12]
37. Kan JM, Cowan CSM, Ooi CY, et al. What can the gut microbiome teach us about the connections between child physical and mental health? A systematic review. *Developmental psychobiology* 2019;61(5):700-13. doi: 10.1002/dev.21819 [published Online First: 2019/01/09]
38. Dinan TG, Cryan JF. The Microbiome-Gut-Brain Axis in Health and Disease. *Gastroenterology clinics of North America* 2017;46(1):77-89. doi: 10.1016/j.gtc.2016.09.007 [published Online First: 2017/02/07]
39. He Y, Wen Q, Yao F, et al. Gut-lung axis: The microbial contributions and clinical implications. *Critical reviews in microbiology* 2017;43(1):81-95. doi: 10.1080/1040841x.2016.1176988 [published Online First: 2016/10/27]
40. Callaghan BL, Fields A, Gee DG, et al. Mind and gut: Associations between mood and gastrointestinal distress in children exposed to adversity. *Development and psychopathology* 2019:1-20. doi: 10.1017/s0954579419000087 [published Online First: 2019/03/29]
41. Barfod KK, Roggenbuck M, Hansen LH, et al. The murine lung microbiome in relation to the intestinal and vaginal bacterial communities. *BMC microbiology* 2013;13:303. doi: 10.1186/1471-2180-13-303 [published Online First: 2014/01/01]
42. Lozupone CA, Hamady M, Kelley ST, et al. Quantitative and qualitative beta diversity measures lead to different insights into factors that structure microbial communities. *Applied and environmental microbiology* 2007;73(5):1576-85. doi: 10.1128/aem.01996-06 [published Online First: 2007/01/16]
43. Anderson JL, Miles C, Tierney AC. Effect of probiotics on respiratory, gastrointestinal and nutritional outcomes in patients with cystic fibrosis: A systematic review. *Journal*

- 1  
2  
3  
4  
5  
6  
7  
8  
9  
10  
11  
12  
13  
14  
15  
16  
17  
18  
19  
20  
21  
22  
23  
24  
25  
26  
27  
28  
29  
30  
31  
32  
33  
34  
35  
36  
37  
38  
39  
40  
41  
42  
43  
44  
45  
46  
47  
48  
49  
50  
51  
52  
53  
54  
55  
56  
57  
58  
59  
60
- of cystic fibrosis : official journal of the European Cystic Fibrosis Society* 2017;16(2):186-97. doi: 10.1016/j.jcf.2016.09.004 [published Online First: 2016/10/04]
44. Mandal S, Van Treuren W, White RA, et al. Analysis of composition of microbiomes: a novel method for studying microbial composition. *Microbial ecology in health and disease* 2015;26:27663. doi: 10.3402/mehd.v26.27663 [published Online First: 2015/06/02]
45. Conceicao-Neto N, Zeller M, Lefrere H, et al. Modular approach to customise sample preparation procedures for viral metagenomics: a reproducible protocol for virome analysis. *Scientific reports* 2015;5:16532. doi: 10.1038/srep16532 [published Online First: 2015/11/13]
46. Varni JW, Bendo CB, Denham J, et al. PedsQL gastrointestinal symptoms module: feasibility, reliability, and validity. *Journal of pediatric gastroenterology and nutrition* 2014;59(3):347-55. doi: 10.1097/mpg.0000000000000414 [published Online First: 2014/05/09]
47. Varni JW, Kay MT, Limbers CA, et al. PedsQL gastrointestinal symptoms module item development: qualitative methods. *Journal of pediatric gastroenterology and nutrition* 2012;54(5):664-71. doi: 10.1097/MPG.0b013e31823c9b88 [published Online First: 2011/10/20]
48. Varni JW, Limbers CA, Neighbors K, et al. The PedsQL Infant Scales: feasibility, internal consistency reliability, and validity in healthy and ill infants. *Quality of life research : an international journal of quality of life aspects of treatment, care and rehabilitation* 2011;20(1):45-55. doi: 10.1007/s11136-010-9730-5 [published Online First: 2010/08/24]
49. Benninga MA, Faure C, Hyman PE, et al. Childhood Functional Gastrointestinal Disorders: Neonate/Toddler. *Gastroenterology* 2016 doi: 10.1053/j.gastro.2016.02.016 [published Online First: 2016/05/05]
50. Hyams JS, Di Lorenzo C, Saps M, et al. Functional Disorders: Children and Adolescents. *Gastroenterology* 2016 doi: 10.1053/j.gastro.2016.02.015 [published Online First: 2016/05/05]
51. Nauta MH, Scholing A, Rapee RM, et al. A parent-report measure of children's anxiety: psychometric properties and comparison with child-report in a clinic and normal sample. *Behaviour research and therapy* 2004;42(7):813-39. doi: 10.1016/s0005-7967(03)00200-6 [published Online First: 2004/05/20]
52. Spence SH. Structure of anxiety symptoms among children: a confirmatory factor-analytic study. *Journal of abnormal psychology* 1997;106(2):280-97. [published Online First: 1997/05/01]
53. Angold A, Costello, E. J., Messer, S. C., Pickles, A., Winder, F., & Silver, D. The development of a short questionnaire for use in epidemiological studies of depression in children and adolescents. *International Journal of Methods in Psychiatric Research* 1995;5:237 - 49.
54. Messer SC, Angold, A., Costello, E.J., Loeber, R., Van Kammen, W., & Stouthamer-Loeber, M. Development of a short questionnaire for use in epidemiological studies of depression in children and adolescents: Factor composition and structure across development. *International Journal of Methods in Psychiatric Research* 1995;5:251-62.
55. Australian Bureau of Statistics. Socio-Economic Indexes for Areas (SEIFA) Technical Paper 2016. ABS, Canberra, 2016.



- 1
  - 2
  - 3
  - 4
  - 5
  - 6
  - 7
  - 8
  - 9
  - 10
  - 11
  - 12
  - 13
  - 14
  - 15
  - 16
  - 17
  - 18
  - 19
  - 20
  - 21
  - 22
  - 23
  - 24
  - 25
  - 26
  - 27
  - 28
  - 29
  - 30
  - 31
  - 32
  - 33
  - 34
  - 35
  - 36
  - 37
  - 38
  - 39
  - 40
  - 41
  - 42
  - 43
  - 44
  - 45
  - 46
  - 47
  - 48
  - 49
  - 50
  - 51
  - 52
  - 53
  - 54
  - 55
  - 56
  - 57
  - 58
  - 59
  - 60
56. Chan AW, Tetzlaff JM, Altman DG, et al. SPIRIT 2013 statement: defining standard protocol items for clinical trials. *Annals of internal medicine* 2013;158(3):200-7. doi: 10.7326/0003-4819-158-3-201302050-00583 [published Online First: 2013/01/09]
57. Wheeler R. Gillick or Fraser? A plea for consistency over competence in children. *BMJ (Clinical research ed)* 2006;332(7545):807. doi: 10.1136/bmj.332.7545.807 [published Online First: 2006/04/08]
58. Whittaker RH. EVOLUTION AND MEASUREMENT OF SPECIES DIVERSITY. *TAXON* 1972;21(2-3):213-51. doi: 10.2307/1218190
59. Shannon CE. A Mathematical Theory of Communication. *Bell System Technical Journal* 1948;27(3):379-423. doi: 10.1002/j.1538-7305.1948.tb01338.x
60. Bray JR, Curtis JT. An Ordination of the Upland Forest Communities of Southern Wisconsin. *Ecological Monographs* 1957;27(4):325-49. doi: 10.2307/1942268
61. Hubbell SP. The unified neutral theory of biodiversity and biogeography: Princeton University Press, Princeton, N.J 2001.
62. Watson JF, Collins CE, Sibbritt DW, et al. Reproducibility and comparative validity of a food frequency questionnaire for Australian children and adolescents. *The international journal of behavioral nutrition and physical activity* 2009;6:62. doi: 10.1186/1479-5868-6-62 [published Online First: 2009/09/12]
63. Burrows T, Berthon B, Garg ML, et al. A comparative validation of a child food frequency questionnaire using red blood cell membrane fatty acids. *European journal of clinical nutrition* 2012;66(7):825-9. doi: 10.1038/ejcn.2012.26 [published Online First: 2012/03/02]
64. Burrows TL, Warren JM, Colyvas K, et al. Validation of overweight children's fruit and vegetable intake using plasma carotenoids. *Obesity (Silver Spring, Md)* 2009;17(1):162-8. doi: 10.1038/oby.2008.495 [published Online First: 2008/11/11]
65. Collins CE, Burrows TL, Truby H, et al. Comparison of energy intake in toddlers assessed by food frequency questionnaire and total energy expenditure measured by the doubly labeled water method. *Journal of the Academy of Nutrition and Dietetics* 2013;113(3):459-63. doi: 10.1016/j.jand.2012.09.021 [published Online First: 2013/01/16]
66. Daviss WB, Birmaher B, Melhem NA, et al. Criterion validity of the Mood and Feelings Questionnaire for depressive episodes in clinic and non-clinic subjects. *Journal of child psychology and psychiatry, and allied disciplines* 2006;47(9):927-34. doi: 10.1111/j.1469-7610.2006.01646.x [published Online First: 2006/08/26]
67. Chervin RD, Hedger K, Dillon JE, et al. Pediatric sleep questionnaire (PSQ): validity and reliability of scales for sleep-disordered breathing, snoring, sleepiness, and behavioral problems. *Sleep medicine* 2000;1(1):21-32. [published Online First: 2000/03/25]
68. Edgar RC. Search and clustering orders of magnitude faster than BLAST. *Bioinformatics (Oxford, England)* 2010;26(19):2460-61. doi: 10.1093/bioinformatics/btq461
69. Lin J, Kramna L, Autio R, et al. Vipie: web pipeline for parallel characterization of viral populations from multiple NGS samples. *BMC genomics* 2017;18(1):378. doi: 10.1186/s12864-017-3721-7 [published Online First: 2017/05/17]
70. Roux S, Enault F, Hurwitz BL, et al. VirSorter: mining viral signal from microbial genomic data. *PeerJ* 2015;3:e985. doi: 10.7717/peerj.985 [published Online First: 2015/06/04]
71. Cox J, Mann M. MaxQuant enables high peptide identification rates, individualized p.p.b.-range mass accuracies and proteome-wide protein quantification. *Nature biotechnology* 2008;26(12):1367-72. doi: 10.1038/nbt.1511 [published Online First: 2008/11/26]

- 1  
2  
3 72. Yatsunenکو T, Rey FE, Manary MJ, et al. Human gut microbiome viewed across age and  
4 geography. *Nature* 2012;486(7402):222-7. doi: 10.1038/nature11053 [published  
5 Online First: 2012/06/16]  
6  
7 73. Derrien M, Alvarez AS, de Vos WM. The Gut Microbiota in the First Decade of Life.  
8 *Trends in microbiology* 2019;27(12):997-1010. doi: 10.1016/j.tim.2019.08.001  
9 [published Online First: 2019/09/03]  
10  
11 74. Milani C, Duranti S, Bottacini F, et al. The First Microbial Colonizers of the Human Gut:  
12 Composition, Activities, and Health Implications of the Infant Gut Microbiota.  
13 *Microbiol Mol Biol Rev* 2017;81(4) doi: 10.1128/membr.00036-17 [published Online  
14 First: 2017/11/10]  
15  
16 75. Simon WL, Salk HM, Ovsyannikova IG, et al. Cytokine production associated with  
17 smallpox vaccine responses. *Immunotherapy* 2014;6(10):1097-112. doi:  
18 10.2217/imt.14.72 [published Online First: 2014/11/28]  
19  
20 76. Talaat KR, Halsey NA, Cox AB, et al. Rapid changes in serum cytokines and chemokines  
21 in response to inactivated influenza vaccination. *Influenza Other Respir Viruses*  
22 2018;12(2):202-10. doi: 10.1111/irv.12509 [published Online First: 2017/10/11]  
23  
24  
25  
26  
27  
28  
29  
30  
31  
32  
33  
34  
35  
36  
37  
38  
39  
40  
41  
42  
43  
44  
45  
46  
47  
48  
49  
50  
51  
52  
53  
54  
55  
56  
57  
58  
59  
60

# Reporting checklist for protocol of a clinical trial.

Based on the SPIRIT guidelines.

## Instructions to authors

Complete this checklist by entering the page numbers from your manuscript where readers will find each of the items listed below.

Your article may not currently address all the items on the checklist. Please modify your text to include the missing information. If you are certain that an item does not apply, please write "n/a" and provide a short explanation.

Upload your completed checklist as an extra file when you submit to a journal.

In your methods section, say that you used the SPIRIT reporting guidelines, and cite them as:

Chan A-W, Tetzlaff JM, Altman DG, Laupacis A, Gøtzsche PC, Krleža-Jerić K, Hróbjartsson A, Mann H, Dickersin K, Berlin J, Doré C, Parulekar W, Summerskill W, Groves T, Schulz K, Sox H, Rockhold FW, Rennie D, Moher D. SPIRIT 2013 Statement: Defining standard protocol items for clinical trials. *Ann Intern Med.* 2013;158(3):200-207

|                                             |                     | Reporting Item                                                                                               | Page Number |
|---------------------------------------------|---------------------|--------------------------------------------------------------------------------------------------------------|-------------|
| <b>Administrative information</b>           |                     |                                                                                                              |             |
| Title                                       | <a href="#">#1</a>  | Descriptive title identifying the study design, population, interventions, and, if applicable, trial acronym | 1           |
| Trial registration                          | <a href="#">#2a</a> | Trial identifier and registry name. If not yet registered, name of intended registry                         | 2           |
| Trial registration: data set                | <a href="#">#2b</a> | All items from the World Health Organization Trial Registration Data Set                                     | n/a         |
| Protocol version                            | <a href="#">#3</a>  | Date and version identifier                                                                                  | n/a         |
| Funding                                     | <a href="#">#4</a>  | Sources and types of financial, material, and other support                                                  | 29          |
| Roles and responsibilities: contributorship | <a href="#">#5a</a> | Names, affiliations, and roles of protocol contributors                                                      | 1, 2, 29    |

|    |                           |                     |                                                              |      |
|----|---------------------------|---------------------|--------------------------------------------------------------|------|
| 1  | Roles and                 | <a href="#">#5b</a> | Name and contact information for the trial sponsor           | n/a  |
| 2  | responsibilities:         |                     |                                                              |      |
| 3  | sponsor contact           |                     |                                                              |      |
| 4  | information               |                     |                                                              |      |
| 5  |                           |                     |                                                              |      |
| 6  |                           |                     |                                                              |      |
| 7  | Roles and                 | <a href="#">#5c</a> | Role of study sponsor and funders, if any, in study design;  | n/a  |
| 8  | responsibilities:         |                     | collection, management, analysis, and interpretation of      |      |
| 9  | sponsor and funder        |                     | data; writing of the report; and the decision to submit the  |      |
| 10 |                           |                     | report for publication, including whether they will have     |      |
| 11 |                           |                     | ultimate authority over any of these activities              |      |
| 12 |                           |                     |                                                              |      |
| 13 |                           |                     |                                                              |      |
| 14 |                           |                     |                                                              |      |
| 15 |                           |                     |                                                              |      |
| 16 | Roles and                 | <a href="#">#5d</a> | Composition, roles, and responsibilities of the coordinating | 29   |
| 17 | responsibilities:         |                     | centre, steering committee, endpoint adjudication            |      |
| 18 | committees                |                     | committee, data management team, and other individuals       |      |
| 19 |                           |                     | or groups overseeing the trial, if applicable (see Item 21a  |      |
| 20 |                           |                     | for data monitoring committee)                               |      |
| 21 |                           |                     |                                                              |      |
| 22 |                           |                     |                                                              |      |
| 23 |                           |                     |                                                              |      |
| 24 | <b>Introduction</b>       |                     |                                                              |      |
| 25 |                           |                     |                                                              |      |
| 26 | Background and            | <a href="#">#6a</a> | Description of research question and justification for       | 6-9  |
| 27 | rationale                 |                     | undertaking the trial, including summary of relevant         |      |
| 28 |                           |                     | studies (published and unpublished) examining benefits       |      |
| 29 |                           |                     | and harms for each intervention                              |      |
| 30 |                           |                     |                                                              |      |
| 31 |                           |                     |                                                              |      |
| 32 |                           |                     |                                                              |      |
| 33 | Background and            | <a href="#">#6b</a> | Explanation for choice of comparators                        | 6-9  |
| 34 | rationale: choice of      |                     |                                                              |      |
| 35 | comparators               |                     |                                                              |      |
| 36 |                           |                     |                                                              |      |
| 37 |                           |                     |                                                              |      |
| 38 | Objectives                | <a href="#">#7</a>  | Specific objectives or hypotheses                            | 9-12 |
| 39 |                           |                     |                                                              |      |
| 40 |                           |                     |                                                              |      |
| 41 | Trial design              | <a href="#">#8</a>  | Description of trial design including type of trial (eg,     | 13   |
| 42 |                           |                     | parallel group, crossover, factorial, single group),         |      |
| 43 |                           |                     | allocation ratio, and framework (eg, superiority,            |      |
| 44 |                           |                     | equivalence, non-inferiority, exploratory)                   |      |
| 45 |                           |                     |                                                              |      |
| 46 |                           |                     |                                                              |      |
| 47 |                           |                     |                                                              |      |
| 48 | <b>Methods:</b>           |                     |                                                              |      |
| 49 | <b>Participants,</b>      |                     |                                                              |      |
| 50 | <b>interventions, and</b> |                     |                                                              |      |
| 51 | <b>outcomes</b>           |                     |                                                              |      |
| 52 |                           |                     |                                                              |      |
| 53 |                           |                     |                                                              |      |
| 54 | Study setting             | <a href="#">#9</a>  | Description of study settings (eg, community clinic,         | 13   |
| 55 |                           |                     | academic hospital) and list of countries where data will be  |      |
| 56 |                           |                     | collected. Reference to where list of study sites can be     |      |
| 57 |                           |                     |                                                              |      |
| 58 |                           |                     |                                                              |      |
| 59 |                           |                     |                                                              |      |
| 60 |                           |                     |                                                              |      |

obtained

|    |                                 |                      |                                                                                                                                                                                                                                                                                                                                                                                |
|----|---------------------------------|----------------------|--------------------------------------------------------------------------------------------------------------------------------------------------------------------------------------------------------------------------------------------------------------------------------------------------------------------------------------------------------------------------------|
| 1  |                                 |                      |                                                                                                                                                                                                                                                                                                                                                                                |
| 2  |                                 |                      |                                                                                                                                                                                                                                                                                                                                                                                |
| 3  | Eligibility criteria            | <a href="#">#10</a>  | Inclusion and exclusion criteria for participants. If applicable, eligibility criteria for study centres and individuals who will perform the interventions (eg, surgeons, psychotherapists)                                                                                                                                                                                   |
| 4  |                                 |                      |                                                                                                                                                                                                                                                                                                                                                                                |
| 5  |                                 |                      |                                                                                                                                                                                                                                                                                                                                                                                |
| 6  |                                 |                      |                                                                                                                                                                                                                                                                                                                                                                                |
| 7  |                                 |                      |                                                                                                                                                                                                                                                                                                                                                                                |
| 8  |                                 |                      |                                                                                                                                                                                                                                                                                                                                                                                |
| 9  | Interventions: description      | <a href="#">#11a</a> | Interventions for each group with sufficient detail to allow replication, including how and when they will be administered                                                                                                                                                                                                                                                     |
| 10 |                                 |                      |                                                                                                                                                                                                                                                                                                                                                                                |
| 11 |                                 |                      |                                                                                                                                                                                                                                                                                                                                                                                |
| 12 |                                 |                      |                                                                                                                                                                                                                                                                                                                                                                                |
| 13 |                                 |                      |                                                                                                                                                                                                                                                                                                                                                                                |
| 14 | Interventions: modifications    | <a href="#">#11b</a> | Criteria for discontinuing or modifying allocated interventions for a given trial participant (eg, drug dose change in response to harms, participant request, or improving / worsening disease)                                                                                                                                                                               |
| 15 |                                 |                      |                                                                                                                                                                                                                                                                                                                                                                                |
| 16 |                                 |                      |                                                                                                                                                                                                                                                                                                                                                                                |
| 17 |                                 |                      |                                                                                                                                                                                                                                                                                                                                                                                |
| 18 |                                 |                      |                                                                                                                                                                                                                                                                                                                                                                                |
| 19 |                                 |                      |                                                                                                                                                                                                                                                                                                                                                                                |
| 20 |                                 |                      |                                                                                                                                                                                                                                                                                                                                                                                |
| 21 | Interventions: adherence        | <a href="#">#11c</a> | Strategies to improve adherence to intervention protocols, and any procedures for monitoring adherence (eg, drug tablet return; laboratory tests)                                                                                                                                                                                                                              |
| 22 |                                 |                      |                                                                                                                                                                                                                                                                                                                                                                                |
| 23 |                                 |                      |                                                                                                                                                                                                                                                                                                                                                                                |
| 24 |                                 |                      |                                                                                                                                                                                                                                                                                                                                                                                |
| 25 |                                 |                      |                                                                                                                                                                                                                                                                                                                                                                                |
| 26 |                                 |                      |                                                                                                                                                                                                                                                                                                                                                                                |
| 27 | Interventions: concomitant care | <a href="#">#11d</a> | Relevant concomitant care and interventions that are permitted or prohibited during the trial                                                                                                                                                                                                                                                                                  |
| 28 |                                 |                      |                                                                                                                                                                                                                                                                                                                                                                                |
| 29 |                                 |                      |                                                                                                                                                                                                                                                                                                                                                                                |
| 30 |                                 |                      |                                                                                                                                                                                                                                                                                                                                                                                |
| 31 | Outcomes                        | <a href="#">#12</a>  | Primary, secondary, and other outcomes, including the specific measurement variable (eg, systolic blood pressure), analysis metric (eg, change from baseline, final value, time to event), method of aggregation (eg, median, proportion), and time point for each outcome. Explanation of the clinical relevance of chosen efficacy and harm outcomes is strongly recommended |
| 32 |                                 |                      |                                                                                                                                                                                                                                                                                                                                                                                |
| 33 |                                 |                      |                                                                                                                                                                                                                                                                                                                                                                                |
| 34 |                                 |                      |                                                                                                                                                                                                                                                                                                                                                                                |
| 35 |                                 |                      |                                                                                                                                                                                                                                                                                                                                                                                |
| 36 |                                 |                      |                                                                                                                                                                                                                                                                                                                                                                                |
| 37 |                                 |                      |                                                                                                                                                                                                                                                                                                                                                                                |
| 38 |                                 |                      |                                                                                                                                                                                                                                                                                                                                                                                |
| 39 |                                 |                      |                                                                                                                                                                                                                                                                                                                                                                                |
| 40 |                                 |                      |                                                                                                                                                                                                                                                                                                                                                                                |
| 41 |                                 |                      |                                                                                                                                                                                                                                                                                                                                                                                |
| 42 | Participant timeline            | <a href="#">#13</a>  | Time schedule of enrolment, interventions (including any run-ins and washouts), assessments, and visits for participants. A schematic diagram is highly recommended (see Figure)                                                                                                                                                                                               |
| 43 |                                 |                      |                                                                                                                                                                                                                                                                                                                                                                                |
| 44 |                                 |                      |                                                                                                                                                                                                                                                                                                                                                                                |
| 45 |                                 |                      |                                                                                                                                                                                                                                                                                                                                                                                |
| 46 |                                 |                      |                                                                                                                                                                                                                                                                                                                                                                                |
| 47 |                                 |                      |                                                                                                                                                                                                                                                                                                                                                                                |
| 48 |                                 |                      |                                                                                                                                                                                                                                                                                                                                                                                |
| 49 | Sample size                     | <a href="#">#14</a>  | Estimated number of participants needed to achieve study objectives and how it was determined, including clinical and statistical assumptions supporting any sample size calculations                                                                                                                                                                                          |
| 50 |                                 |                      |                                                                                                                                                                                                                                                                                                                                                                                |
| 51 |                                 |                      |                                                                                                                                                                                                                                                                                                                                                                                |
| 52 |                                 |                      |                                                                                                                                                                                                                                                                                                                                                                                |
| 53 |                                 |                      |                                                                                                                                                                                                                                                                                                                                                                                |
| 54 |                                 |                      |                                                                                                                                                                                                                                                                                                                                                                                |
| 55 | Recruitment                     | <a href="#">#15</a>  | Strategies for achieving adequate participant enrolment to reach target sample size                                                                                                                                                                                                                                                                                            |
| 56 |                                 |                      |                                                                                                                                                                                                                                                                                                                                                                                |
| 57 |                                 |                      |                                                                                                                                                                                                                                                                                                                                                                                |
| 58 |                                 |                      |                                                                                                                                                                                                                                                                                                                                                                                |
| 59 |                                 |                      |                                                                                                                                                                                                                                                                                                                                                                                |
| 60 |                                 |                      |                                                                                                                                                                                                                                                                                                                                                                                |

1 **Methods:**

2 **Assignment of**  
3 **interventions (for**  
4 **controlled trials)**  
5  
6

7  
8 Allocation: sequence [#16a](#) Method of generating the allocation sequence (eg, n/a  
9 generation computer-generated random numbers), and list of any  
10 factors for stratification. To reduce predictability of a  
11 random sequence, details of any planned restriction (eg,  
12 blocking) should be provided in a separate document that  
13 is unavailable to those who enrol participants or assign  
14 interventions  
15  
16  
17  
18

19 Allocation [#16b](#) Mechanism of implementing the allocation sequence (eg, n/a  
20 concealment central telephone; sequentially numbered, opaque, sealed  
21 mechanism envelopes), describing any steps to conceal the sequence  
22 until interventions are assigned  
23  
24  
25

26 Allocation: [#16c](#) Who will generate the allocation sequence, who will enrol n/a  
27 implementation participants, and who will assign participants to  
28 interventions  
29  
30

31 Blinding (masking) [#17a](#) Who will be blinded after assignment to interventions (eg, n/a  
32 trial participants, care providers, outcome assessors, data  
33 analysts), and how  
34  
35

36 Blinding (masking): [#17b](#) If blinded, circumstances under which unblinding is n/a  
37 emergency unblinding permissible, and procedure for revealing a participant's  
38 allocated intervention during the trial  
39  
40

41 **Methods: Data**  
42 **collection,**  
43 **management, and**  
44 **analysis**  
45  
46  
47

48  
49 Data collection plan [#18a](#) Plans for assessment and collection of outcome, baseline, 18-24  
50 and other trial data, including any related processes to  
51 promote data quality (eg, duplicate measurements,  
52 training of assessors) and a description of study  
53 instruments (eg, questionnaires, laboratory tests) along  
54 with their reliability and validity, if known. Reference to  
55 where data collection forms can be found, if not in the  
56  
57  
58  
59

protocol

|    |                            |                      |                                                                |
|----|----------------------------|----------------------|----------------------------------------------------------------|
| 1  |                            |                      |                                                                |
| 2  |                            |                      |                                                                |
| 3  | Data collection plan:      | <a href="#">#18b</a> | Plans to promote participant retention and complete            |
| 4  | retention                  |                      | follow-up, including list of any outcome data to be            |
| 5  |                            |                      | collected for participants who discontinue or deviate from     |
| 6  |                            |                      | intervention protocols                                         |
| 7  |                            |                      |                                                                |
| 8  |                            |                      |                                                                |
| 9  | Data management            | <a href="#">#19</a>  | Plans for data entry, coding, security, and storage,           |
| 10 |                            |                      | including any related processes to promote data quality        |
| 11 |                            |                      | (eg, double data entry; range checks for data values).         |
| 12 |                            |                      | Reference to where details of data management                  |
| 13 |                            |                      | procedures can be found, if not in the protocol                |
| 14 |                            |                      |                                                                |
| 15 |                            |                      |                                                                |
| 16 |                            |                      |                                                                |
| 17 |                            |                      |                                                                |
| 18 | Statistics: outcomes       | <a href="#">#20a</a> | Statistical methods for analysing primary and secondary        |
| 19 |                            |                      | outcomes. Reference to where other details of the              |
| 20 |                            |                      | statistical analysis plan can be found, if not in the protocol |
| 21 |                            |                      |                                                                |
| 22 |                            |                      |                                                                |
| 23 | Statistics: additional     | <a href="#">#20b</a> | Methods for any additional analyses (eg, subgroup and          |
| 24 | analyses                   |                      | adjusted analyses)                                             |
| 25 |                            |                      |                                                                |
| 26 |                            |                      |                                                                |
| 27 | Statistics: analysis       | <a href="#">#20c</a> | Definition of analysis population relating to protocol non-    |
| 28 | population and             |                      | adherence (eg, as randomised analysis), and any                |
| 29 | missing data               |                      | statistical methods to handle missing data (eg, multiple       |
| 30 |                            |                      | imputation)                                                    |
| 31 |                            |                      |                                                                |
| 32 |                            |                      |                                                                |
| 33 | <b>Methods: Monitoring</b> |                      |                                                                |
| 34 |                            |                      |                                                                |
| 35 |                            |                      |                                                                |
| 36 | Data monitoring:           | <a href="#">#21a</a> | Composition of data monitoring committee (DMC);                |
| 37 | formal committee           |                      | summary of its role and reporting structure; statement of      |
| 38 |                            |                      | whether it is independent from the sponsor and competing       |
| 39 |                            |                      | interests; and reference to where further details about its    |
| 40 |                            |                      | charter can be found, if not in the protocol. Alternatively,   |
| 41 |                            |                      | an explanation of why a DMC is not needed                      |
| 42 |                            |                      |                                                                |
| 43 |                            |                      |                                                                |
| 44 |                            |                      |                                                                |
| 45 |                            |                      |                                                                |
| 46 | Data monitoring:           | <a href="#">#21b</a> | Description of any interim analyses and stopping               |
| 47 | interim analysis           |                      | guidelines, including who will have access to these interim    |
| 48 |                            |                      | results and make the final decision to terminate the trial     |
| 49 |                            |                      |                                                                |
| 50 |                            |                      |                                                                |
| 51 | Harms                      | <a href="#">#22</a>  | Plans for collecting, assessing, reporting, and managing       |
| 52 |                            |                      | solicited and spontaneously reported adverse events and        |
| 53 |                            |                      | other unintended effects of trial interventions or trial       |
| 54 |                            |                      | conduct                                                        |
| 55 |                            |                      |                                                                |
| 56 |                            |                      |                                                                |
| 57 |                            |                      |                                                                |
| 58 | Auditing                   | <a href="#">#23</a>  | Frequency and procedures for auditing trial conduct, if        |
| 59 |                            |                      | n/a                                                            |
| 60 |                            |                      |                                                                |

any, and whether the process will be independent from investigators and the sponsor

## Ethics and dissemination

|                                      |                      |                                                                                                                                                                                                                                                                                     |       |
|--------------------------------------|----------------------|-------------------------------------------------------------------------------------------------------------------------------------------------------------------------------------------------------------------------------------------------------------------------------------|-------|
| Research ethics approval             | <a href="#">#24</a>  | Plans for seeking research ethics committee / institutional review board (REC / IRB) approval                                                                                                                                                                                       | 27    |
| Protocol amendments                  | <a href="#">#25</a>  | Plans for communicating important protocol modifications (eg, changes to eligibility criteria, outcomes, analyses) to relevant parties (eg, investigators, REC / IRBs, trial participants, trial registries, journals, regulators)                                                  | 27    |
| Consent or assent                    | <a href="#">#26a</a> | Who will obtain informed consent or assent from potential trial participants or authorised surrogates, and how (see Item 32)                                                                                                                                                        | 13-14 |
| Consent or assent: ancillary studies | <a href="#">#26b</a> | Additional consent provisions for collection and use of participant data and biological specimens in ancillary studies, if applicable                                                                                                                                               | 13-14 |
| Confidentiality                      | <a href="#">#27</a>  | How personal information about potential and enrolled participants will be collected, shared, and maintained in order to protect confidentiality before, during, and after the trial                                                                                                | 24    |
| Declaration of interests             | <a href="#">#28</a>  | Financial and other competing interests for principal investigators for the overall trial and each study site                                                                                                                                                                       | 29    |
| Data access                          | <a href="#">#29</a>  | Statement of who will have access to the final trial dataset, and disclosure of contractual agreements that limit such access for investigators                                                                                                                                     | 29    |
| Ancillary and post trial care        | <a href="#">#30</a>  | Provisions, if any, for ancillary and post-trial care, and for compensation to those who suffer harm from trial participation                                                                                                                                                       | 24-25 |
| Dissemination policy: trial results  | <a href="#">#31a</a> | Plans for investigators and sponsor to communicate trial results to participants, healthcare professionals, the public, and other relevant groups (eg, via publication, reporting in results databases, or other data sharing arrangements), including any publication restrictions | 27    |
| Dissemination policy:                | <a href="#">#31b</a> | Authorship eligibility guidelines and any intended use of                                                                                                                                                                                                                           | 28    |



|   |                       |                      |                                                                    |
|---|-----------------------|----------------------|--------------------------------------------------------------------|
| 1 | authorship            | professional writers |                                                                    |
| 2 | Dissemination policy: | <a href="#">#31c</a> | Plans, if any, for granting public access to the full protocol, 29 |
| 3 | reproducible research |                      | participant-level dataset, and statistical code                    |
| 4 |                       |                      |                                                                    |
| 5 |                       |                      |                                                                    |

## 6 Appendices

|    |                      |                     |                                                               |     |
|----|----------------------|---------------------|---------------------------------------------------------------|-----|
| 8  | Informed consent     | <a href="#">#32</a> | Model consent form and other related documentation            | n/a |
| 9  | materials            |                     | given to participants and authorised surrogates               |     |
| 10 |                      |                     |                                                               |     |
| 11 |                      |                     |                                                               |     |
| 12 | Biological specimens | <a href="#">#33</a> | Plans for collection, laboratory evaluation, and storage of   | 24  |
| 13 |                      |                     | biological specimens for genetic or molecular analysis in     |     |
| 14 |                      |                     | the current trial and for future use in ancillary studies, if |     |
| 15 |                      |                     | applicable                                                    |     |
| 16 |                      |                     |                                                               |     |
| 17 |                      |                     |                                                               |     |
| 18 |                      |                     |                                                               |     |

19 None The SPIRIT checklist is distributed under the terms of the Creative Commons Attribution  
 20 License CC-BY-ND 3.0. This checklist can be completed online using <https://www.goodreports.org/>, a  
 21 tool made by the [EQUATOR Network](#) in collaboration with [Penelope.ai](#)  
 22  
 23  
 24  
 25  
 26  
 27  
 28  
 29  
 30  
 31  
 32  
 33  
 34  
 35  
 36  
 37  
 38  
 39  
 40  
 41  
 42  
 43  
 44  
 45  
 46  
 47  
 48  
 49  
 50  
 51  
 52  
 53  
 54  
 55  
 56  
 57  
 58  
 59  
 60
